# Supplementary material
Source: publisher figshare collection journal article supplement (https://acs.figshare.com/ndownloader/files/5121886)
Supplement: Supplementary file 1 [file 5121886]

 
data_ELEK
 
#-- [Cu4(C16H13N4O2)4] (ClO4)2 (NO3)2 (H2O)4 ------------------------------- 
 
_audit_creation_date               '2002-04-19'
_audit_creation_method             from_xtal_archive_file_using_CIFIO
_audit_update_record               '2004-07-08'
_audit_conform_dict_name           'cif_core.dic'
_audit_conform_dict_version        '2.0.1'
 
#--------------------------------------------------------------------------- 

_publ_requested_journal            'Inorg. Chem.'
 
 
_publ_contact_author                                                   

;
     Alan F. Williams'
     Department of Inorganic, Analytical and  Applied Chemistry
     University of Geneva
     30, quai E. Ansermet
     CH - 1211 Geneva 4
     Switzerland
;

_publ_contact_author_email          Alan.Williams@chiam.unige.ch
_publ_contact_author_phone          '41 22 379 64 25'
_publ_contact_author_fax            '41 22 379 68 30'
 
 
  
loop_
_publ_author_name
_publ_author_address
 
   ' Katharina Isele'
;    Department of Inorganic, Analytical and  Applied Chemistry
     University of Geneva
     30, quai E. Ansermet
     CH - 1211 Geneva 4
     Switzerland
;

   ' Patrick Franz'
;    Department of Chemistry
     Universitat Bern
     Freistrasse 9
     CH - 3009 Bern
     Switzerland
;

   ' Gerald Bernardinelli'
;    Laboratoiry of X-ray Crystallography
     University de Geneva
     24, quai E. Ansermet
     CH - 1211 Geneva 4
     Switzerland
;

   ' Silvio Decurtins'
;    Department of Chemistry
     Universitat Bern
     Freistrasse 9
     CH - 3009 Bern
     Switzerland
;

   ' Alan F. Williams'
;    Department of Inorganic, Analytical and  Applied Chemistry
     University of Geneva
     30, quai E. Ansermet
     CH - 1211 Geneva 4
     Switzerland
;


_publ_section_title
;
Self-assembly and Interconversion of Tetranuclear Copper(II) Complexes
;

 
_chemical_formula_moiety           
'Cu4 (C16 H13 N4 O2)4 ; (Cl O4)2 ; (N O3)2 ; (H2 O)4'

_chemical_formula_sum              'C64 H60 Cl2 Cu4 N18 O26'
_chemical_formula_weight           1822.5
_chemical_absolute_configuration   ad  
 
 
_symmetry_cell_setting             orthorhombic
_symmetry_space_group_name_H-M     'P 21 21 21'
_symmetry_space_group_name_Hall    'P 2AC 2AB'

loop_
_symmetry_equiv_pos_as_xyz
  +x,+y,+z  1/2-x,-y,1/2+z  1/2+x,1/2-y,-z  -x,1/2+y,1/2-z
_cell_length_a                     16.8565(6)
_cell_length_b                     17.3548(9)
_cell_length_c                     24.6059(11)
_cell_angle_alpha                  90.00000
_cell_angle_beta                   90.00000
_cell_angle_gamma                  90.00000
_cell_volume                       7198.2(6)
_cell_formula_units_Z              4
_exptl_crystal_density_diffrn        1.682
_exptl_crystal_density_meas        not_measured
_diffrn_radiation_type             'MoK\a'
_diffrn_radiation_wavelength       .71073
_cell_measurement_reflns_used      7996
_cell_measurement_theta_min        4.0
_cell_measurement_theta_max        25.98
_cell_measurement_temperature      200
_exptl_absorpt_coefficient_mu      1.34
_exptl_crystal_F_000               3712
_exptl_crystal_description         prism
_exptl_crystal_size_max            .25
_exptl_crystal_size_mid            .194
_exptl_crystal_size_min            .173
_exptl_crystal_colour              blue
 
_diffrn_measurement_device_type    'Stoe Ipds'
_diffrn_measurement_method         \f
_diffrn_detector_area_resol_mean   6
_exptl_absorpt_correction_type     numerical
_exptl_absorpt_process_details     'XRED; Stoe & Cie, 1999'
_exptl_absorpt_correction_T_min    .7566
_exptl_absorpt_correction_T_max    .8355
_diffrn_reflns_number              91133
_reflns_number_total               14056
_reflns_number_gt                  6810
_reflns_Friedel_coverage           .914   

_reflns_threshold_expression       'refl observed if Fo > 3.99 \s(Fo)'
_diffrn_reflns_theta_max             25.98
_diffrn_measured_fraction_theta_max  1.0
_diffrn_reflns_theta_full            25.98
_diffrn_measured_fraction_theta_full 1.0
_diffrn_reflns_av_R_equivalents       .079
_diffrn_reflns_limit_h_min         -20
_diffrn_reflns_limit_h_max         20
_diffrn_reflns_limit_k_min         -21
_diffrn_reflns_limit_k_max         21
_diffrn_reflns_limit_l_min         -30
_diffrn_reflns_limit_l_max         30
_diffrn_standards_decay_%          0
 
_refine_ls_structure_factor_coef   F
_refine_ls_R_factor_gt                .032
_refine_ls_wR_factor_ref              .032
_refine_ls_goodness_of_fit_ref       1.24(1)
_refine_ls_number_reflns           6810
_refine_ls_number_parameters       1035
_refine_ls_weighting_scheme        calc
_refine_ls_weighting_details       '\w=1/[\s^2^(Fo)+0.0003(Fo^2^)]'
_refine_ls_hydrogen_treatment      noref
_refine_ls_shift/su_max               .0372
_refine_diff_density_max              .828
_refine_diff_density_min              -.702
_refine_ls_extinction_method       none
_refine_ls_extinction_coef         .00000
_refine_ls_abs_structure_details   Flack_xabs_refined
_refine_ls_abs_structure_Flack     -.01(1)

_refine_special_details
;
Disorders:
   The nitrate h is disordered on two positions (with the N atom in common)
   which have been refined with population parameters of 0.70 and 0.30.

Hydrogen treatment:
   Hydrogen atoms of water molecules and those of -OH groups (O2a, O2b, O2c, 
   O2d) have not been observed nor calculated. 
   (=> i.e. 12 H less by asymmetric unit) 

   Other hydrogen atomic coordinates have been calculated.
;

_computing_data_collection         'EXPOSE (Stoe & Cie, 1999)'
_computing_cell_refinement         'CELL (Stoe & Cie, 1999)'
_computing_data_reduction          'XRED (Stoe & Cie, 1999)'
_computing_structure_solution      'SHELXS 97'
_computing_structure_refinement    xtal_CRYLSQ
_computing_molecular_graphics      xtal_gx3
_computing_publication_material    xtal_CIFIO
 
 
loop_
_atom_type_symbol
_atom_type_scat_source
_atom_type_scat_dispersion_real
_atom_type_scat_dispersion_imag
  C  Int._Tables_Vol_IV_Tables_2.2B_and_2.3.1  .002  .002
  H  Int._Tables_Vol_IV_Tables_2.2B_and_2.3.1  0  0
  N  Int._Tables_Vol_IV_Tables_2.2B_and_2.3.1  .004  .003
  O  Int._Tables_Vol_IV_Tables_2.2B_and_2.3.1  .008  .006
  Cl  Int._Tables_Vol_IV_Tables_2.2B_and_2.3.1  .132  .159
  Cu  Int._Tables_Vol_IV_Tables_2.2B_and_2.3.1  .263   1.266
 
 
loop_
_atom_site_label
_atom_site_fract_x
_atom_site_fract_y
_atom_site_fract_z
_atom_site_U_iso_or_equiv
_atom_site_occupancy
_atom_site_adp_type
  Cu1  -.05981(7)  .56098(12)  .49440(10)  .0296(9)  1.00000  Uani
  Cu2  .03077(9)  .58172(12)  .60223(9)  .0317(11)  1.00000  Uani
  Cu3  .07083(8)  .43509(12)  .49497(10)  .0296(9)  1.00000  Uani
  Cu4  -.02548(9)  .41499(12)  .59988(9)  .0307(11)  1.00000  Uani
  O1a  -.0730(5)  .5577(6)  .5742(5)  .030(6)  1.00000  Uani
  O2a  -.2242(6)  .6103(8)  .6764(6)  .065(8)  1.00000  Uani
  N1a  -.1393(6)  .4183(8)  .6107(7)  .040(7)  1.00000  Uani
  N2a  -.2614(6)  .4665(9)  .6153(6)  .043(8)  1.00000  Uani
  N3a  -.0076(7)  .5915(8)  .6771(6)  .036(8)  1.00000  Uani
  N4a  -.0988(8)  .6127(10)  .7426(6)  .056(9)  1.00000  Uani
  C1a  -.1932(8)  .3545(10)  .6192(8)  .041(9)  1.00000  Uani
  C2a  -.1782(10)  .2773(10)  .6262(10)  .059(11)  1.00000  Uani
  C3a  -.2461(11)  .2310(10)  .6329(9)  .061(10)  1.00000  Uani
  C4a  -.3248(12)  .2635(13)  .6333(11)  .082(15)  1.00000  Uani
  C5a  -.3356(9)  .3389(13)  .6297(11)  .068(12)  1.00000  Uani
  C6a  -.2693(9)  .3871(11)  .6220(9)  .051(11)  1.00000  Uani
  C7a  -.1822(8)  .4811(10)  .6098(7)  .035(8)  1.00000  Uani
  C8a  -.1492(7)  .5614(10)  .5981(7)  .036(8)  1.00000  Uani
  C9a  -.1510(9)  .6154(11)  .6472(8)  .051(11)  1.00000  Uani
  C10a  -.0855(9)  .6047(11)  .6894(9)  .049(11)  1.00000  Uani
  C11a  .0291(9)  .5889(11)  .7290(8)  .045(10)  1.00000  Uani
  C12a  .1077(10)  .5760(13)  .7431(9)  .062(11)  1.00000  Uani
  C13a  .1267(11)  .5790(17)  .7984(10)  .089(14)  1.00000  Uani
  C14a  .0697(13)  .589(2)  .8369(8)  .112(17)  1.00000  Uani
  C15a  -.0071(12)  .6041(17)  .8234(9)  .095(15)  1.00000  Uani
  C16a  -.0270(10)  .6059(12)  .7691(9)  .063(11)  1.00000  Uani
  O1b  .0809(5)  .4391(7)  .5757(5)  .036(6)  1.00000  Uani
  O2b  .2221(6)  .3877(7)  .6835(6)  .052(6)  1.00000  Uani
  N1b  .1458(6)  .5778(8)  .6151(6)  .034(7)  1.00000  Uani
  N2b  .2665(7)  .5272(9)  .6180(7)  .051(9)  1.00000  Uani
  N3b  .0082(7)  .4060(8)  .6763(7)  .039(9)  1.00000  Uani
  N4b  .0901(9)  .3793(10)  .7420(8)  .060(10)  1.00000  Uani
  C1b  .2014(9)  .6351(10)  .6237(9)  .042(9)  1.00000  Uani
  C2b  .1882(11)  .7147(11)  .6284(9)  .056(11)  1.00000  Uani
  C3b  .2583(12)  .7579(12)  .6358(11)  .081(14)  1.00000  Uani
  C4b  .3308(12)  .7269(14)  .6356(11)  .082(15)  1.00000  Uani
  C5b  .3448(10)  .6490(13)  .6296(10)  .064(11)  1.00000  Uani
  C6b  .2773(9)  .6059(11)  .6236(8)  .045(10)  1.00000  Uani
  C7b  .1884(8)  .5103(9)  .6132(7)  .038(8)  1.00000  Uani
  C8b  .1546(7)  .4333(9)  .6025(8)  .033(8)  1.00000  Uani
  C9b  .1522(8)  .3792(9)  .6518(7)  .033(8)  1.00000  Uani
  C10b  .0808(9)  .3912(9)  .6884(7)  .037(9)  1.00000  Uani
  C11b  -.0348(9)  .4049(11)  .7243(8)  .047(10)  1.00000  Uani
  C12b  -.1160(9)  .4200(13)  .7363(8)  .056(10)  1.00000  Uani
  C13b  -.1387(11)  .4155(18)  .7901(9)  .085(13)  1.00000  Uani
  C14b  -.0855(13)  .3950(17)  .8313(10)  .097(15)  1.00000  Uani
  C15b  -.0073(12)  .3815(16)  .8213(11)  .088(14)  1.00000  Uani
  C16b  .0141(11)  .3923(14)  .7659(8)  .069(12)  1.00000  Uani
  O1c  .0437(5)  .5856(6)  .5227(5)  .034(6)  1.00000  Uani
  O2c  .1516(5)  .7017(7)  .4217(6)  .048(6)  1.00000  Uani
  N1c  .1697(6)  .4923(7)  .4852(6)  .029(6)  1.00000  Uani
  N2c  .2519(5)  .5911(7)  .4811(6)  .040(6)  1.00000  Uani
  N3c  -.0303(6)  .5851(8)  .4182(6)  .034(6)  1.00000  Uani
  N4c  .0377(7)  .6427(8)  .3547(7)  .044(7)  1.00000  Uani
  C1c  .2472(7)  .4616(9)  .4813(7)  .032(7)  1.00000  Uani
  C2c  .2758(7)  .3885(9)  .4784(7)  .036(8)  1.00000  Uani
  C3c  .3577(7)  .3772(10)  .4783(8)  .044(8)  1.00000  Uani
  C4c  .4081(7)  .4410(10)  .4789(9)  .057(9)  1.00000  Uani
  C5c  .3816(7)  .5142(10)  .4794(8)  .055(9)  1.00000  Uani
  C6c  .2990(7)  .5272(9)  .4783(8)  .038(7)  1.00000  Uani
  C7c  .1768(7)  .5689(10)  .4856(7)  .037(8)  1.00000  Uani
  C8c  .1084(7)  .6245(9)  .4962(7)  .030(7)  1.00000  Uani
  C9c  .0828(7)  .6705(9)  .4471(8)  .035(8)  1.00000  Uani
  C10c  .0314(7)  .6310(10)  .4089(7)  .037(8)  1.00000  Uani
  C11c  -.0655(8)  .5654(10)  .3696(9)  .040(9)  1.00000  Uani
  C12c  -.1299(9)  .5204(11)  .3548(7)  .045(9)  1.00000  Uani
  C13c  -.1467(10)  .5140(13)  .2993(9)  .062(11)  1.00000  Uani
  C14c  -.1031(12)  .5506(14)  .2582(9)  .071(13)  1.00000  Uani
  C15c  -.0395(11)  .5961(13)  .2727(10)  .066(12)  1.00000  Uani
  C16c  -.0224(9)  .6020(10)  .3279(8)  .046(10)  1.00000  Uani
  O1d  -.0356(5)  .4097(6)  .5195(5)  .028(5)  1.00000  Uani
  O2d  -.1393(5)  .2983(7)  .4166(6)  .047(6)  1.00000  Uani
  N1d  -.1576(6)  .5055(8)  .4821(6)  .033(7)  1.00000  Uani
  N2d  -.2401(6)  .4057(8)  .4727(6)  .039(7)  1.00000  Uani
  N3d  .0448(6)  .4127(7)  .4180(6)  .032(6)  1.00000  Uani
  N4d  -.0228(7)  .3578(8)  .3500(6)  .041(7)  1.00000  Uani
  C1d  -.2360(7)  .5326(9)  .4748(7)  .029(7)  1.00000  Uani
  C2d  -.2628(7)  .6089(10)  .4777(8)  .042(9)  1.00000  Uani
  C3d  -.3436(8)  .6190(9)  .4735(9)  .046(9)  1.00000  Uani
  C4d  -.3954(8)  .5571(11)  .4672(9)  .057(9)  1.00000  Uani
  C5d  -.3681(8)  .4827(9)  .4635(8)  .052(9)  1.00000  Uani
  C6d  -.2870(7)  .4729(10)  .4697(8)  .040(8)  1.00000  Uani
  C7d  -.1645(6)  .4287(10)  .4812(7)  .031(7)  1.00000  Uani
  C8d  -.0982(7)  .3732(8)  .4935(8)  .036(8)  1.00000  Uani
  C9d  -.0696(7)  .3242(9)  .4440(8)  .031(7)  1.00000  Uani
  C10d  -.0149(7)  .3681(9)  .4043(7)  .032(7)  1.00000  Uani
  C11d  .0791(8)  .4343(10)  .3677(8)  .036(8)  1.00000  Uani
  C12d  .1437(8)  .4831(10)  .3553(9)  .045(9)  1.00000  Uani
  C13d  .1612(9)  .4955(11)  .3011(9)  .054(10)  1.00000  Uani
  C14d  .1183(11)  .4580(12)  .2606(9)  .061(11)  1.00000  Uani
  C15d  .0564(10)  .4117(12)  .2712(8)  .058(10)  1.00000  Uani
  C16d  .0360(9)  .3991(11)  .3246(8)  .048(10)  1.00000  Uani
  Cl1e  .0850(3)  .2386(3)  .5416(3)  .051(3)  1.00000  Uani
  O1e  .1130(6)  .2981(7)  .5087(6)  .054(7)  1.00000  Uani
  O2e  .1516(6)  .2077(8)  .5708(6)  .069(8)  1.00000  Uani
  O3e  .0502(8)  .1828(8)  .5072(7)  .086(9)  1.00000  Uani
  O4e  .0252(6)  .2635(8)  .5780(7)  .076(9)  1.00000  Uani
  Cl1f  -.0723(3)  .7615(3)  .5402(3)  .052(3)  1.00000  Uani
  O1f  -.1011(6)  .6993(6)  .5060(7)  .055(7)  1.00000  Uani
  O2f  -.1385(7)  .7978(7)  .5667(6)  .070(8)  1.00000  Uani
  O3f  -.0190(7)  .7338(7)  .5801(8)  .079(9)  1.00000  Uani
  O4f  -.0324(7)  .8167(8)  .5055(9)  .090(9)  1.00000  Uani
  N1g  .4165(7)  .3855(6)  .6171(5)  .055(6)  1.00000  Uani
  O1g  .4710(6)  .3423(6)  .6114(6)  .102(8)  1.00000  Uani
  O2g  .3491(6)  .3602(8)  .6087(6)  .076(8)  1.00000  Uani
  O3g  .4246(8)  .4560(6)  .6303(5)  .081(8)  1.00000  Uani
  N1h  .3631(10)  .2418(16)  .7527(12)  .078(10)  1.00000  Uani
  O1h  .3463(10)  .2937(16)  .7868(11)  .112(17)  .70000  Uani
  O2h  .3463(16)  .2513(11)  .7034(8)  .118(16)  .70000  Uani
  O3h  .4170(19)  .2137(18)  .7694(13)  .164(11)  .70000  Uiso
  O1h'  .300(9)  .243(9)  .784(6)  .33(8)  .30000  Uiso
  O2h'  .378(5)  .307(5)  .738(4)  .15(3)  .30000  Uiso
  O3h'  .360(3)  .190(4)  .729(3)  .082(12)  .30000  Uiso
  O1w  .2117(9)  .1548(13)  .6788(8)  .135(14)  1.00000  Uani
  O2w  -.2000(9)  .8343(15)  .6752(9)  .154(17)  1.00000  Uani
  O3w  -.3718(11)  .6616(9)  .6250(8)  .138(14)  1.00000  Uani
  O4w  -.4269(8)  .5233(8)  .5997(6)  .100(9)  1.00000  Uani
  H02a  -.30427  .50378  .61540  .04000  1.00000  Uiso
  H04a  -.14971  .62590  .75989  .04000  1.00000  Uiso
  H2a  -.12428  .25519  .62588  .04000  1.00000  Uiso
  H3a  -.24052  .17383  .63613  .04000  1.00000  Uiso
  H4a  -.37084  .23129  .63986  .04000  1.00000  Uiso
  H5a  -.38946  .35748  .63027  .04000  1.00000  Uiso
  H8a  -.18590  .58303  .57054  .04000  1.00000  Uiso
  H9a  -.14271  .66683  .63014  .04000  1.00000  Uiso
  H12a  .14794  .56236  .71704  .04000  1.00000  Uiso
  H13a  .18274  .57080  .80962  .04000  1.00000  Uiso
  H14a  .08406  .59841  .87531  .04000  1.00000  Uiso
  H15a  -.04868  .61397  .84952  .04000  1.00000  Uiso
  H02b  .30911  .48915  .61563  .04000  1.00000  Uiso
  H04b  .13825  .36774  .76039  .04000  1.00000  Uiso
  H2b  .13434  .73781  .62827  .04000  1.00000  Uiso
  H3b  .25246  .81282  .64232  .04000  1.00000  Uiso
  H4b  .37698  .76337  .63628  .04000  1.00000  Uiso
  H5b  .39781  .62547  .63286  .04000  1.00000  Uiso
  H8b  .19146  .40585  .58031  .04000  1.00000  Uiso
  H9b  .14947  .32860  .63672  .04000  1.00000  Uiso
  H12b  -.15486  .43040  .70557  .04000  1.00000  Uiso
  H13b  -.19354  .42787  .79946  .04000  1.00000  Uiso
  H14b  -.10816  .39288  .86691  .04000  1.00000  Uiso
  H15b  .02931  .37262  .85221  .04000  1.00000  Uiso
  H02c  .26970  .64393  .47944  .04000  1.00000  Uiso
  H04c  .07766  .67512  .33685  .04000  1.00000  Uiso
  H2c  .23981  .34401  .47908  .04000  1.00000  Uiso
  H3c  .38004  .32601  .47756  .04000  1.00000  Uiso
  H4c  .46474  .43186  .47854  .04000  1.00000  Uiso
  H5c  .41769  .55675  .48039  .04000  1.00000  Uiso
  H8c  .13024  .66409  .52090  .04000  1.00000  Uiso
  H9c  .04790  .71275  .46107  .04000  1.00000  Uiso
  H12c  -.16210  .49458  .38261  .04000  1.00000  Uiso
  H13c  -.19207  .48176  .28852  .04000  1.00000  Uiso
  H14c  -.11791  .54362  .22115  .04000  1.00000  Uiso
  H15c  -.00912  .62521  .24520  .04000  1.00000  Uiso
  H02d  -.25918  .35297  .47057  .04000  1.00000  Uiso
  H04d  -.06345  .32792  .33189  .04000  1.00000  Uiso
  H2d  -.22672  .65153  .47868  .04000  1.00000  Uiso
  H3d  -.36460  .67184  .47625  .04000  1.00000  Uiso
  H4d  -.45218  .56643  .46515  .04000  1.00000  Uiso
  H5d  -.40353  .43870  .45566  .04000  1.00000  Uiso
  H8d  -.12047  .33479  .51711  .04000  1.00000  Uiso
  H9d  -.03659  .28336  .45724  .04000  1.00000  Uiso
  H12d  .17559  .50871  .38424  .04000  1.00000  Uiso
  H13d  .20551  .53087  .29084  .04000  1.00000  Uiso
  H14d  .13450  .46576  .22186  .04000  1.00000  Uiso
  H15d  .02381  .38878  .24173  .04000  1.00000  Uiso
 
 
loop_
_atom_site_aniso_label
_atom_site_aniso_U_11
_atom_site_aniso_U_22
_atom_site_aniso_U_33
_atom_site_aniso_U_12
_atom_site_aniso_U_13
_atom_site_aniso_U_23
  Cu1  .0244(6)  .0361(10)  .0283(12)  -.0013(6)  -.0006(7)  .0008(10)
  Cu2  .0303(8)  .0352(12)  .0297(13)  .0003(7)  -.0012(8)  -.0029(10)
  Cu3  .0231(6)  .0369(10)  .0288(12)  -.0028(6)  .0005(7)  .0002(10)
  Cu4  .0240(8)  .0392(12)  .0290(13)  -.0008(7)  .0032(8)  .0002(10)
  O1a  .031(4)  .035(6)  .024(7)  .007(4)  .006(4)  .001(5)
  O2a  .042(5)  .089(10)  .064(9)  .017(5)  .016(6)  -.019(7)
  N1a  .028(5)  .044(8)  .047(9)  -.001(5)  .002(6)  -.001(7)
  N2a  .026(6)  .068(10)  .036(9)  .005(5)  .006(6)  -.003(7)
  N3a  .040(6)  .038(8)  .029(9)  .009(6)  .003(6)  -.015(8)
  N4a  .054(8)  .092(11)  .023(8)  .002(7)  .012(6)  -.009(8)
  C1a  .030(6)  .054(10)  .039(10)  -.010(6)  .005(6)  .003(7)
  C2a  .061(9)  .034(9)  .082(15)  -.012(7)  .017(10)  -.001(9)
  C3a  .073(10)  .043(8)  .069(12)  -.005(7)  .026(9)  .008(8)
  C4a  .078(12)  .076(13)  .093(18)  -.047(11)  .014(13)  .001(13)
  C5a  .037(8)  .084(14)  .084(15)  -.027(8)  .024(9)  -.008(11)
  C6a  .035(7)  .058(11)  .061(14)  -.013(7)  .013(8)  -.006(10)
  C7a  .032(6)  .052(9)  .022(8)  -.011(6)  .011(6)  -.010(7)
  C8a  .033(7)  .053(10)  .023(8)  .006(6)  -.009(6)  -.005(8)
  C9a  .046(9)  .053(11)  .053(13)  .020(7)  .018(8)  .008(10)
  C10a  .046(8)  .049(11)  .052(14)  -.003(7)  .017(9)  .010(9)
  C11a  .050(8)  .058(11)  .028(10)  -.005(7)  -.020(8)  -.000(8)
  C12a  .063(9)  .082(13)  .040(10)  -.019(9)  .005(8)  .004(10)
  C13a  .067(10)  .15(2)  .046(12)  -.003(12)  -.020(9)  -.029(13)
  C14a  .084(13)  .23(3)  .019(9)  -.025(16)  -.016(9)  -.014(13)
  C15a  .077(12)  .19(3)  .019(10)  -.014(12)  .001(8)  -.015(12)
  C16a  .051(8)  .089(13)  .047(13)  -.010(8)  .023(9)  -.035(10)
  O1b  .018(4)  .051(7)  .038(8)  -.002(4)  .000(5)  .004(6)
  O2b  .040(5)  .068(8)  .046(7)  .006(5)  -.012(5)  .010(6)
  N1b  .031(5)  .042(8)  .029(7)  -.000(5)  -.005(5)  -.006(7)
  N2b  .026(6)  .066(10)  .062(11)  -.007(6)  -.008(7)  .006(9)
  N3b  .034(6)  .044(9)  .038(11)  -.005(6)  .012(6)  -.003(8)
  N4b  .049(7)  .075(10)  .054(12)  -.009(7)  -.003(7)  .022(8)
  C1b  .056(9)  .035(8)  .036(9)  -.008(6)  -.010(7)  .012(6)
  C2b  .067(10)  .055(12)  .048(11)  -.009(8)  -.005(8)  -.000(9)
  C3b  .074(12)  .072(13)  .098(16)  -.042(10)  -.017(12)  .021(12)
  C4b  .068(12)  .098(17)  .079(17)  -.048(11)  -.028(12)  .027(14)
  C5b  .049(8)  .084(13)  .058(12)  -.014(8)  -.014(8)  .021(10)
  C6b  .039(7)  .065(12)  .032(10)  -.017(7)  -.005(7)  .007(9)
  C7b  .026(6)  .058(10)  .030(9)  .011(6)  .004(6)  -.005(8)
  C8b  .019(5)  .042(9)  .038(10)  .005(5)  -.010(6)  -.006(8)
  C9b  .040(7)  .035(8)  .023(8)  .003(6)  .002(6)  .015(7)
  C10b  .047(8)  .036(9)  .028(10)  .002(6)  .002(7)  .020(8)
  C11b  .051(8)  .054(11)  .034(10)  -.011(7)  -.013(8)  .005(8)
  C12b  .043(7)  .089(13)  .035(9)  .000(8)  .011(7)  .009(9)
  C13b  .055(9)  .16(2)  .036(10)  -.012(11)  .017(8)  .001(12)
  C14b  .079(12)  .17(2)  .044(13)  -.034(13)  .018(11)  .017(13)
  C15b  .079(13)  .140(17)  .046(13)  -.003(11)  .003(10)  .020(12)
  C16b  .063(10)  .122(17)  .022(11)  -.001(9)  .013(8)  .003(10)
  O1c  .023(4)  .035(6)  .043(7)  -.002(4)  -.003(4)  .002(5)
  O2c  .037(5)  .048(6)  .060(8)  -.008(4)  .008(5)  .022(6)
  N1c  .026(5)  .032(7)  .030(7)  -.005(4)  -.003(5)  .004(5)
  N2c  .024(4)  .031(6)  .065(9)  -.008(4)  .006(5)  .004(6)
  N3c  .028(5)  .044(7)  .029(7)  .005(5)  -.003(5)  .009(6)
  N4c  .044(6)  .048(8)  .038(8)  .006(5)  -.009(6)  .009(6)
  C1c  .024(5)  .043(8)  .030(8)  .002(5)  -.004(5)  -.003(6)
  C2c  .031(6)  .035(8)  .041(10)  -.001(5)  .009(6)  .010(7)
  C3c  .026(6)  .054(9)  .053(10)  .005(6)  .008(6)  .004(7)
  C4c  .027(5)  .046(8)  .097(13)  .006(6)  .013(7)  .009(8)
  C5c  .016(5)  .060(9)  .088(13)  -.003(5)  .006(6)  .004(8)
  C6c  .028(6)  .034(7)  .052(9)  -.012(5)  .003(6)  .000(6)
  C7c  .032(6)  .044(9)  .036(9)  .006(6)  .000(6)  -.002(7)
  C8c  .029(5)  .042(8)  .020(7)  -.008(5)  -.001(6)  .008(7)
  C9c  .024(6)  .037(8)  .045(10)  .000(5)  .008(6)  .008(7)
  C10c  .027(6)  .050(9)  .033(9)  .007(5)  .005(6)  .017(7)
  C11c  .043(7)  .043(9)  .033(10)  .014(6)  -.001(6)  .002(8)
  C12c  .041(7)  .067(11)  .027(9)  .008(7)  .001(7)  -.001(8)
  C13c  .054(9)  .085(13)  .048(12)  .005(8)  -.014(8)  -.017(10)
  C14c  .074(11)  .106(17)  .034(11)  .010(11)  -.015(9)  .002(11)
  C15c  .059(9)  .095(14)  .044(12)  .009(9)  .002(9)  .016(10)
  C16c  .052(9)  .049(10)  .036(11)  .019(7)  -.015(8)  .000(8)
  O1d  .026(4)  .033(5)  .025(6)  -.002(4)  -.004(4)  -.004(4)
  O2d  .034(5)  .055(7)  .053(7)  -.008(4)  -.004(5)  -.013(6)
  N1d  .029(5)  .038(8)  .032(8)  -.001(5)  -.007(5)  .003(6)
  N2d  .022(5)  .042(7)  .054(8)  -.006(5)  -.003(5)  -.002(6)
  N3d  .027(5)  .032(6)  .037(8)  .004(4)  -.001(5)  .004(6)
  N4d  .040(6)  .055(8)  .028(7)  .006(5)  -.007(6)  -.013(6)
  C1d  .027(6)  .041(8)  .019(7)  .003(5)  -.003(5)  -.007(6)
  C2d  .031(6)  .048(10)  .048(11)  .002(6)  -.007(6)  .011(8)
  C3d  .041(7)  .039(8)  .057(11)  .015(6)  -.007(7)  .000(7)
  C4d  .031(6)  .056(10)  .084(12)  .007(6)  -.007(7)  .005(9)
  C5d  .028(6)  .051(8)  .076(11)  -.008(6)  .003(7)  -.006(7)
  C6d  .025(6)  .054(9)  .041(8)  .003(6)  -.005(6)  .005(7)
  C7d  .023(5)  .043(9)  .027(8)  -.009(5)  -.002(5)  -.009(7)
  C8d  .026(5)  .022(7)  .061(12)  -.000(5)  -.006(7)  .011(8)
  C9d  .023(5)  .036(7)  .034(8)  .001(5)  -.008(6)  -.009(6)
  C10d  .030(6)  .037(7)  .028(8)  .008(5)  .009(6)  .003(6)
  C11d  .037(6)  .043(10)  .029(9)  .010(6)  .012(6)  .000(8)
  C12d  .038(7)  .045(9)  .053(12)  .000(6)  .014(7)  .002(8)
  C13d  .058(9)  .058(9)  .046(11)  -.002(7)  .021(8)  .006(8)
  C14d  .071(10)  .079(12)  .031(10)  -.002(8)  .006(8)  .003(9)
  C15d  .063(10)  .082(12)  .028(10)  -.003(9)  .001(8)  -.002(8)
  C16d  .040(8)  .068(12)  .036(11)  .011(7)  -.010(7)  -.007(9)
  Cl1e  .0462(18)  .039(3)  .069(4)  .0012(15)  .000(2)  .001(3)
  O1e  .053(5)  .044(6)  .065(9)  .001(5)  .022(6)  .013(7)
  O2e  .051(6)  .086(9)  .069(9)  .038(6)  -.009(6)  -.027(7)
  O3e  .108(9)  .061(8)  .088(10)  -.033(6)  -.032(9)  .006(8)
  O4e  .042(6)  .088(10)  .097(11)  .012(6)  .036(7)  .050(9)
  Cl1f  .0412(17)  .032(2)  .083(4)  .0050(14)  -.0032(19)  -.011(3)
  O1f  .046(5)  .030(6)  .090(10)  .005(4)  -.012(7)  -.013(7)
  O2f  .071(7)  .067(8)  .072(9)  .039(6)  .009(7)  -.014(7)
  O3f  .064(7)  .052(7)  .123(14)  .025(6)  -.045(8)  -.025(9)
  O4f  .064(6)  .050(7)  .158(15)  -.011(5)  .027(10)  -.007(9)
  N1g  .050(6)  .050(6)  .063(7)  .011(5)  .001(6)  -.002(5)
  O1g  .057(6)  .067(6)  .183(13)  .023(5)  -.005(8)  -.046(7)
  O2g  .050(6)  .098(8)  .082(8)  .020(5)  .011(6)  -.014(7)
  O3g  .113(9)  .057(6)  .072(8)  .019(6)  -.003(7)  -.017(5)
  N1h  .123(11)  .066(12)  .045(8)  .004(10)  .008(12)  -.017(8)
  O1h  .055(9)  .16(3)  .12(2)  .026(11)  -.018(10)  -.123(18)
  O2h  .21(3)  .094(14)  .050(11)  -.063(14)  .022(12)  -.046(10)
  O1w  .080(9)  .27(3)  .056(10)  -.022(11)  .003(8)  .049(12)
  O2w  .074(9)  .29(3)  .095(15)  -.045(13)  -.008(10)  -.022(16)
  O3w  .167(15)  .082(9)  .163(17)  -.029(9)  -.034(13)  .063(10)
  O4w  .093(8)  .112(10)  .095(10)  .020(7)  .005(8)  .034(8)
 
 
 
 
loop_
_geom_bond_atom_site_label_1
_geom_bond_atom_site_label_2
_geom_bond_site_symmetry_1
_geom_bond_site_symmetry_2
_geom_bond_distance
  Cu1  Cu2  .  .  3.082(3)
  Cu1  Cu3  .  .  3.102(3)
  Cu1  Cu4  .  .  3.673(3)
  Cu1  O1a  .  .  1.976(11)
  Cu1  O1c  .  .  1.926(9)
  Cu1  N3c  .  .  1.984(14)
  Cu1  O1d  .  .  2.729(10)
  Cu1  N1d  .  .  1.933(11)
  Cu1  O1f  .  .  2.515(11)
  Cu2  Cu3  .  .  3.728(3)
  Cu2  Cu4  .  .  3.045(3)
  Cu2  O1a  .  .  1.927(9)
  Cu2  N3a  .  .  1.960(14)
  Cu2  O1b  .  .  2.694(11)
  Cu2  N1b  .  .  1.965(10)
  Cu2  O1c  .  .  1.971(12)
  Cu2  O3f  .  .  2.823(12)
  Cu3  Cu4  .  .  3.069(3)
  Cu3  O1b  .  .  1.996(12)
  Cu3  O1c  .  .  2.739(10)
  Cu3  N1c  .  .  1.955(10)
  Cu3  O1d  .  .  1.943(8)
  Cu3  N3d  .  .  1.983(14)
  Cu3  O1e  .  .  2.504(11)
  Cu4  O1a  .  .  2.679(10)
  Cu4  N1a  .  .  1.937(10)
  Cu4  O1b  .  .  1.934(9)
  Cu4  N3b  .  .  1.969(16)
  Cu4  C10b  .  .  2.851(16)
  Cu4  O1d  .  .  1.987(11)
  Cu4  O4e  .  .  2.817(13)
  O1a  C8a  .  .  1.414(15)
  O2a  C9a  .  .  1.43(2)
  N1a  C1a  .  .  1.448(19)
  N1a  C7a  .  .  1.31(2)
  N2a  C6a  .  .  1.39(3)
  N2a  C7a  .  .  1.365(17)
  N3a  C10a  .  .  1.366(19)
  N3a  C11a  .  .  1.42(3)
  N4a  C10a  .  .  1.34(3)
  N4a  C16a  .  .  1.38(3)
  C1a  C2a  .  .  1.38(3)
  C1a  C6a  .  .  1.40(2)
  C2a  C3a  .  .  1.41(3)
  C3a  C4a  .  .  1.44(3)
  C4a  C5a  .  .  1.32(4)
  C5a  C6a  .  .  1.41(3)
  C7a  C8a  .  .  1.53(3)
  C8a  C9a  .  .  1.53(3)
  C9a  C10a  .  .  1.53(3)
  C11a  C12a  .  .  1.39(3)
  C11a  C16a  .  .  1.40(3)
  C12a  C13a  .  .  1.40(4)
  C13a  C14a  .  .  1.36(3)
  C14a  C15a  .  .  1.36(3)
  C15a  C16a  .  .  1.38(3)
  O1b  C8b  .  .  1.411(15)
  O2b  C9b  .  .  1.420(17)
  N1b  C1b  .  .  1.38(2)
  N1b  C7b  .  .  1.37(2)
  N2b  C6b  .  .  1.39(3)
  N2b  C7b  .  .  1.355(17)
  N3b  C10b  .  .  1.286(18)
  N3b  C11b  .  .  1.39(3)
  N4b  C10b  .  .  1.34(3)
  N4b  C16b  .  .  1.43(3)
  C1b  C2b  .  .  1.41(3)
  C1b  C6b  .  .  1.38(3)
  C2b  C3b  .  .  1.41(3)
  C3b  C4b  .  .  1.34(3)
  C4b  C5b  .  .  1.38(4)
  C5b  C6b  .  .  1.37(3)
  C7b  C8b  .  .  1.48(3)
  C8b  C9b  .  .  1.53(3)
  C9b  C10b  .  .  1.52(3)
  C11b  C12b  .  .  1.42(3)
  C11b  C16b  .  .  1.33(3)
  C12b  C13b  .  .  1.38(3)
  C13b  C14b  .  .  1.40(4)
  C14b  C15b  .  .  1.36(3)
  C15b  C16b  .  .  1.42(4)
  O1c  C8c  .  .  1.438(16)
  O2c  C9c  .  .  1.424(17)
  N1c  C1c  .  .  1.413(15)
  N1c  C7c  .  .  1.33(3)
  N2c  C6c  .  .  1.365(18)
  N2c  C7c  .  .  1.329(15)
  N3c  C10c  .  .  1.330(17)
  N3c  C11c  .  .  1.38(3)
  N4c  C10c  .  .  1.35(3)
  N4c  C16c  .  .  1.40(3)
  C1c  C2c  .  .  1.36(3)
  C1c  C6c  .  .  1.44(2)
  C2c  C3c  .  .  1.394(17)
  C3c  C4c  .  .  1.40(3)
  C4c  C5c  .  .  1.35(3)
  C5c  C6c  .  .  1.410(17)
  C7c  C8c  .  .  1.526(19)
  C8c  C9c  .  .  1.51(3)
  C9c  C10c  .  .  1.45(3)
  C11c  C12c  .  .  1.38(3)
  C11c  C16c  .  .  1.41(3)
  C12c  C13c  .  .  1.40(3)
  C13c  C14c  .  .  1.40(3)
  C14c  C15c  .  .  1.38(3)
  C15c  C16c  .  .  1.39(3)
  O1d  C8d  .  .  1.387(16)
  O2d  C9d  .  .  1.428(17)
  N1d  C1d  .  .  1.414(15)
  N1d  C7d  .  .  1.34(3)
  N2d  C6d  .  .  1.41(2)
  N2d  C7d  .  .  1.352(15)
  N3d  C10d  .  .  1.314(17)
  N3d  C11d  .  .  1.41(3)
  N4d  C10d  .  .  1.35(3)
  N4d  C16d  .  .  1.37(3)
  C1d  C2d  .  .  1.40(3)
  C1d  C6d  .  .  1.35(3)
  C2d  C3d  .  .  1.377(18)
  C3d  C4d  .  .  1.39(3)
  C4d  C5d  .  .  1.37(3)
  C5d  C6d  .  .  1.386(18)
  C7d  C8d  .  .  1.506(18)
  C8d  C9d  .  .  1.56(3)
  C9d  C10d  .  .  1.54(3)
  C11d  C12d  .  .  1.41(3)
  C11d  C16d  .  .  1.42(3)
  C12d  C13d  .  .  1.38(3)
  C13d  C14d  .  .  1.39(3)
  C14d  C15d  .  .  1.34(3)
  C15d  C16d  .  .  1.38(3)
  Cl1e  O1e  .  .  1.395(13)
  Cl1e  O2e  .  .  1.435(13)
  Cl1e  O3e  .  .  1.415(15)
  Cl1e  O4e  .  .  1.416(14)
  Cl1f  O1f  .  .  1.452(13)
  Cl1f  O2f  .  .  1.438(13)
  Cl1f  O3f  .  .  1.414(16)
  Cl1f  O4f  .  .  1.451(17)
  N1g  O1g  .  .  1.193(14)
  N1g  O2g  .  .  1.236(15)
  N1g  O3g  .  .  1.273(14)
  N1h  O1h  .  .  1.26(4)
  N1h  O2h  .  .  1.26(4)
  N1h  O3h  .  .  1.11(4)
  N1h  O1h'  .  .  1.31(15)
  N1h  O2h'  .  .  1.21(9)
  N1h  O3h'  .  .  1.07(6)
  O1h  O1h'  .  .  1.17(15)
  O1h  O2h'  .  .  1.34(9)
  O2h  O2h'  .  .  1.39(9)
  O2h  O3h'  .  .  1.26(6)
  O3h  O3h'  .  .  1.44(6)
 
 
loop_
_geom_angle_atom_site_label_1
_geom_angle_atom_site_label_2
_geom_angle_atom_site_label_3
_geom_angle_site_symmetry_1
_geom_angle_site_symmetry_2
_geom_angle_site_symmetry_3
_geom_angle
  Cu2  Cu1  Cu3  .  .  .  74.14(7)
  Cu2  Cu1  Cu4  .  .  .  52.72(6)
  Cu2  Cu1  O1a  .  .  .  37.3(3)
  Cu2  Cu1  O1c  .  .  .  38.2(4)
  Cu2  Cu1  N3c  .  .  .  131.7(3)
  Cu2  Cu1  O1d  .  .  .  81.0(3)
  Cu2  Cu1  N1d  .  .  .  128.0(5)
  Cu2  Cu1  O1f  .  .  .  85.9(4)
  Cu3  Cu1  Cu4  .  .  .  53.07(6)
  Cu3  Cu1  O1a  .  .  .  93.2(3)
  Cu3  Cu1  O1c  .  .  .  60.8(3)
  Cu3  Cu1  N3c  .  .  .  88.6(4)
  Cu3  Cu1  O1d  .  .  .  38.26(17)
  Cu3  Cu1  N1d  .  .  .  104.8(4)
  Cu3  Cu1  O1f  .  .  .  150.2(3)
  Cu4  Cu1  O1a  .  .  .  45.2(3)
  Cu4  Cu1  O1c  .  .  .  75.8(4)
  Cu4  Cu1  N3c  .  .  .  140.7(4)
  Cu4  Cu1  O1d  .  .  .  32.1(3)
  Cu4  Cu1  N1d  .  .  .  84.3(4)
  Cu4  Cu1  O1f  .  .  .  128.5(4)
  O1a  Cu1  O1c  .  .  .  75.5(4)
  O1a  Cu1  N3c  .  .  .  166.6(5)
  O1a  Cu1  O1d  .  .  .  76.4(4)
  O1a  Cu1  N1d  .  .  .  92.6(5)
  O1a  Cu1  O1f  .  .  .  83.3(5)
  O1c  Cu1  N3c  .  .  .  93.9(5)
  O1c  Cu1  O1d  .  .  .  89.8(4)
  O1c  Cu1  N1d  .  .  .  160.0(5)
  O1c  Cu1  O1f  .  .  .  89.9(4)
  N3c  Cu1  O1d  .  .  .  112.3(5)
  N3c  Cu1  N1d  .  .  .  99.9(6)
  N3c  Cu1  O1f  .  .  .  88.5(5)
  O1d  Cu1  N1d  .  .  .  71.6(4)
  O1d  Cu1  O1f  .  .  .  159.1(5)
  N1d  Cu1  O1f  .  .  .  104.9(4)
  Cu1  Cu2  Cu3  .  .  .  53.17(6)
  Cu1  Cu2  Cu4  .  .  .  73.65(7)
  Cu1  Cu2  O1a  .  .  .  38.4(4)
  Cu1  Cu2  N3a  .  .  .  131.0(4)
  Cu1  Cu2  O1b  .  .  .  80.8(3)
  Cu1  Cu2  N1b  .  .  .  128.6(4)
  Cu1  Cu2  O1c  .  .  .  37.2(3)
  Cu1  Cu2  O3f  .  .  .  78.2(4)
  Cu3  Cu2  Cu4  .  .  .  52.73(6)
  Cu3  Cu2  O1a  .  .  .  76.3(3)
  Cu3  Cu2  N3a  .  .  .  141.6(4)
  Cu3  Cu2  O1b  .  .  .  31.3(3)
  Cu3  Cu2  N1b  .  .  .  84.9(4)
  Cu3  Cu2  O1c  .  .  .  45.6(3)
  Cu3  Cu2  O3f  .  .  .  123.7(4)
  Cu4  Cu2  O1a  .  .  .  60.3(3)
  Cu4  Cu2  N3a  .  .  .  89.8(4)
  Cu4  Cu2  O1b  .  .  .  38.78(19)
  Cu4  Cu2  N1b  .  .  .  106.1(4)
  Cu4  Cu2  O1c  .  .  .  92.8(3)
  Cu4  Cu2  O3f  .  .  .  142.4(3)
  O1a  Cu2  N3a  .  .  .  93.2(5)
  O1a  Cu2  O1b  .  .  .  89.9(4)
  O1a  Cu2  N1b  .  .  .  161.1(5)
  O1a  Cu2  O1c  .  .  .  75.6(4)
  O1a  Cu2  O3f  .  .  .  82.1(4)
  N3a  Cu2  O1b  .  .  .  114.2(5)
  N3a  Cu2  N1b  .  .  .  100.2(6)
  N3a  Cu2  O1c  .  .  .  165.3(5)
  N3a  Cu2  O3f  .  .  .  90.2(5)
  O1b  Cu2  N1b  .  .  .  72.4(5)
  O1b  Cu2  O1c  .  .  .  75.9(4)
  O1b  Cu2  O3f  .  .  .  154.8(5)
  N1b  Cu2  O1c  .  .  .  93.0(5)
  N1b  Cu2  O3f  .  .  .  110.9(5)
  O1c  Cu2  O3f  .  .  .  79.0(5)
  Cu1  Cu3  Cu2  .  .  .  52.69(6)
  Cu1  Cu3  Cu4  .  .  .  73.04(7)
  Cu1  Cu3  O1b  .  .  .  92.3(3)
  Cu1  Cu3  O1c  .  .  .  37.87(18)
  Cu1  Cu3  N1c  .  .  .  104.3(4)
  Cu1  Cu3  O1d  .  .  .  60.4(3)
  Cu1  Cu3  N3d  .  .  .  88.7(4)
  Cu1  Cu3  O1e  .  .  .  150.5(3)
  Cu2  Cu3  Cu4  .  .  .  52.15(6)
  Cu2  Cu3  O1b  .  .  .  44.5(3)
  Cu2  Cu3  O1c  .  .  .  30.9(3)
  Cu2  Cu3  N1c  .  .  .  84.0(4)
  Cu2  Cu3  O1d  .  .  .  76.6(3)
  Cu2  Cu3  N3d  .  .  .  140.4(4)
  Cu2  Cu3  O1e  .  .  .  127.2(4)
  Cu4  Cu3  O1b  .  .  .  37.9(3)
  Cu4  Cu3  O1c  .  .  .  79.1(3)
  Cu4  Cu3  N1c  .  .  .  127.8(4)
  Cu4  Cu3  O1d  .  .  .  39.2(3)
  Cu4  Cu3  N3d  .  .  .  131.6(3)
  Cu4  Cu3  O1e  .  .  .  85.9(3)
  O1b  Cu3  O1c  .  .  .  74.5(4)
  O1b  Cu3  N1c  .  .  .  91.9(5)
  O1b  Cu3  O1d  .  .  .  77.1(4)
  O1b  Cu3  N3d  .  .  .  167.7(5)
  O1b  Cu3  O1e  .  .  .  82.8(5)
  O1c  Cu3  N1c  .  .  .  71.9(4)
  O1c  Cu3  O1d  .  .  .  89.1(4)
  O1c  Cu3  N3d  .  .  .  112.8(5)
  O1c  Cu3  O1e  .  .  .  156.9(4)
  N1c  Cu3  O1d  .  .  .  160.2(5)
  N1c  Cu3  N3d  .  .  .  99.8(5)
  N1c  Cu3  O1e  .  .  .  104.9(4)
  O1d  Cu3  N3d  .  .  .  92.8(5)
  O1d  Cu3  O1e  .  .  .  90.2(4)
  N3d  Cu3  O1e  .  .  .  90.3(5)
  Cu1  Cu4  Cu2  .  .  .  53.63(6)
  Cu1  Cu4  Cu3  .  .  .  53.89(6)
  Cu1  Cu4  O1a  .  .  .  31.6(3)
  Cu1  Cu4  N1a  .  .  .  85.5(5)
  Cu1  Cu4  O1b  .  .  .  77.3(4)
  Cu1  Cu4  N3b  .  .  .  140.7(4)
  Cu1  Cu4  C10b  .  .  .  137.6(4)
  Cu1  Cu4  O1d  .  .  .  46.8(3)
  Cu1  Cu4  O4e  .  .  .  123.8(4)
  Cu2  Cu4  Cu3  .  .  .  75.13(7)
  Cu2  Cu4  O1a  .  .  .  38.67(19)
  Cu2  Cu4  N1a  .  .  .  106.1(4)
  Cu2  Cu4  O1b  .  .  .  60.8(4)
  Cu2  Cu4  N3b  .  .  .  88.1(4)
  Cu2  Cu4  C10b  .  .  .  85.8(4)
  Cu2  Cu4  O1d  .  .  .  95.1(3)
  Cu2  Cu4  O4e  .  .  .  142.8(3)
  Cu3  Cu4  O1a  .  .  .  81.6(3)
  Cu3  Cu4  N1a  .  .  .  129.5(5)
  Cu3  Cu4  O1b  .  .  .  39.4(4)
  Cu3  Cu4  N3b  .  .  .  131.2(4)
  Cu3  Cu4  C10b  .  .  .  109.1(4)
  Cu3  Cu4  O1d  .  .  .  38.1(3)
  Cu3  Cu4  O4e  .  .  .  77.6(3)
  O1a  Cu4  N1a  .  .  .  73.1(5)
  O1a  Cu4  O1b  .  .  .  90.3(4)
  O1a  Cu4  N3b  .  .  .  112.6(5)
  O1a  Cu4  C10b  .  .  .  120.1(4)
  O1a  Cu4  O1d  .  .  .  77.4(4)
  O1a  Cu4  O4e  .  .  .  155.3(4)
  N1a  Cu4  O1b  .  .  .  162.4(6)
  N1a  Cu4  N3b  .  .  .  99.0(6)
  N1a  Cu4  C10b  .  .  .  121.4(6)
  N1a  Cu4  O1d  .  .  .  93.1(5)
  N1a  Cu4  O4e  .  .  .  110.7(5)
  O1b  Cu4  N3b  .  .  .  92.5(5)
  O1b  Cu4  C10b  .  .  .  71.6(5)
  O1b  Cu4  O1d  .  .  .  77.5(5)
  O1b  Cu4  O4e  .  .  .  82.1(4)
  N3b  Cu4  C10b  .  .  .  22.8(5)
  N3b  Cu4  O1d  .  .  .  166.1(5)
  N3b  Cu4  O4e  .  .  .  91.2(5)
  C10b  Cu4  O1d  .  .  .  143.9(4)
  C10b  Cu4  O4e  .  .  .  79.7(5)
  O1d  Cu4  O4e  .  .  .  78.0(5)
  Cu1  O1a  Cu2  .  .  .  104.3(5)
  Cu1  O1a  Cu4  .  .  .  103.2(4)
  Cu1  O1a  C8a  .  .  .  121.0(9)
  Cu2  O1a  Cu4  .  .  .  81.0(4)
  Cu2  O1a  C8a  .  .  .  131.7(10)
  Cu4  O1a  C8a  .  .  .  102.5(9)
  Cu4  N1a  C1a  .  .  .  128.2(10)
  Cu4  N1a  C7a  .  .  .  124.7(10)
  C1a  N1a  C7a  .  .  .  107.0(11)
  C6a  N2a  C7a  .  .  .  106.8(12)
  Cu2  N3a  C10a  .  .  .  122.6(12)
  Cu2  N3a  C11a  .  .  .  134.3(10)
  C10a  N3a  C11a  .  .  .  103.1(14)
  C10a  N4a  C16a  .  .  .  107.9(14)
  N1a  C1a  C2a  .  .  .  130.4(13)
  N1a  C1a  C6a  .  .  .  105.8(14)
  C2a  C1a  C6a  .  .  .  123.7(15)
  C1a  C2a  C3a  .  .  .  115.0(15)
  C2a  C3a  C4a  .  .  .  121.7(17)
  C3a  C4a  C5a  .  .  .  120.9(18)
  C4a  C5a  C6a  .  .  .  119.1(16)
  N2a  C6a  C1a  .  .  .  107.7(13)
  N2a  C6a  C5a  .  .  .  132.8(15)
  C1a  C6a  C5a  .  .  .  119.4(17)
  N1a  C7a  N2a  .  .  .  112.6(14)
  N1a  C7a  C8a  .  .  .  124.2(12)
  N2a  C7a  C8a  .  .  .  123.0(13)
  O1a  C8a  C7a  .  .  .  111.5(12)
  O1a  C8a  C9a  .  .  .  112.0(12)
  C7a  C8a  C9a  .  .  .  113.8(14)
  O2a  C9a  C8a  .  .  .  112.1(13)
  O2a  C9a  C10a  .  .  .  105.9(15)
  C8a  C9a  C10a  .  .  .  116.6(14)
  N3a  C10a  N4a  .  .  .  113.3(16)
  N3a  C10a  C9a  .  .  .  124.4(17)
  N4a  C10a  C9a  .  .  .  122.2(14)
  N3a  C11a  C12a  .  .  .  130.2(16)
  N3a  C11a  C16a  .  .  .  109.5(14)
  C12a  C11a  C16a  .  .  .  120.2(17)
  C11a  C12a  C13a  .  .  .  117.1(17)
  C12a  C13a  C14a  .  .  .  121.3(18)
  C13a  C14a  C15a  .  .  .  122(2)
  C14a  C15a  C16a  .  .  .  118.2(19)
  N4a  C16a  C11a  .  .  .  106.1(17)
  N4a  C16a  C15a  .  .  .  132.4(17)
  C11a  C16a  C15a  .  .  .  121.0(17)
  Cu2  O1b  Cu3  .  .  .  104.3(5)
  Cu2  O1b  Cu4  .  .  .  80.5(4)
  Cu2  O1b  C8b  .  .  .  103.3(9)
  Cu3  O1b  Cu4  .  .  .  102.7(5)
  Cu3  O1b  C8b  .  .  .  122.5(9)
  Cu4  O1b  C8b  .  .  .  131.1(10)
  Cu2  N1b  C1b  .  .  .  131.9(11)
  Cu2  N1b  C7b  .  .  .  122.7(10)
  C1b  N1b  C7b  .  .  .  105.3(11)
  C6b  N2b  C7b  .  .  .  110.4(13)
  Cu4  N3b  C10b  .  .  .  120.8(12)
  Cu4  N3b  C11b  .  .  .  131.7(10)
  C10b  N3b  C11b  .  .  .  107.2(15)
  C10b  N4b  C16b  .  .  .  106.0(14)
  N1b  C1b  C2b  .  .  .  127.8(14)
  N1b  C1b  C6b  .  .  .  111.5(14)
  C2b  C1b  C6b  .  .  .  120.6(15)
  C1b  C2b  C3b  .  .  .  113.6(16)
  C2b  C3b  C4b  .  .  .  124(2)
  C3b  C4b  C5b  .  .  .  124(2)
  C4b  C5b  C6b  .  .  .  113.8(16)
  N2b  C6b  C1b  .  .  .  103.9(13)
  N2b  C6b  C5b  .  .  .  131.1(15)
  C1b  C6b  C5b  .  .  .  124.9(18)
  N1b  C7b  N2b  .  .  .  108.8(13)
  N1b  C7b  C8b  .  .  .  125.2(11)
  N2b  C7b  C8b  .  .  .  125.8(13)
  O1b  C8b  C7b  .  .  .  110.9(12)
  O1b  C8b  C9b  .  .  .  112.9(11)
  C7b  C8b  C9b  .  .  .  115.1(14)
  O2b  C9b  C8b  .  .  .  110.4(11)
  O2b  C9b  C10b  .  .  .  108.5(13)
  C8b  C9b  C10b  .  .  .  113.9(12)
  Cu4  C10b  N3b  .  .  .  36.4(9)
  Cu4  C10b  N4b  .  .  .  147.7(11)
  Cu4  C10b  C9b  .  .  .  93.7(10)
  N3b  C10b  N4b  .  .  .  111.7(15)
  N3b  C10b  C9b  .  .  .  130.1(16)
  N4b  C10b  C9b  .  .  .  117.9(13)
  N3b  C11b  C12b  .  .  .  132.4(17)
  N3b  C11b  C16b  .  .  .  109.6(14)
  C12b  C11b  C16b  .  .  .  117.8(17)
  C11b  C12b  C13b  .  .  .  117.0(17)
  C12b  C13b  C14b  .  .  .  122.1(18)
  C13b  C14b  C15b  .  .  .  122(3)
  C14b  C15b  C16b  .  .  .  113(3)
  N4b  C16b  C11b  .  .  .  105.3(16)
  N4b  C16b  C15b  .  .  .  127.0(17)
  C11b  C16b  C15b  .  .  .  127.0(17)
  Cu1  O1c  Cu2  .  .  .  104.5(5)
  Cu1  O1c  Cu3  .  .  .  81.3(4)
  Cu1  O1c  C8c  .  .  .  128.8(9)
  Cu2  O1c  Cu3  .  .  .  103.5(5)
  Cu2  O1c  C8c  .  .  .  123.4(9)
  Cu3  O1c  C8c  .  .  .  102.0(8)
  Cu3  N1c  C1c  .  .  .  127.2(10)
  Cu3  N1c  C7c  .  .  .  125.5(8)
  C1c  N1c  C7c  .  .  .  107.1(10)
  C6c  N2c  C7c  .  .  .  108.8(12)
  Cu1  N3c  C10c  .  .  .  119.0(11)
  Cu1  N3c  C11c  .  .  .  131.3(10)
  C10c  N3c  C11c  .  .  .  109.6(14)
  C10c  N4c  C16c  .  .  .  109.3(13)
  N1c  C1c  C2c  .  .  .  133.1(13)
  N1c  C1c  C6c  .  .  .  105.5(12)
  C2c  C1c  C6c  .  .  .  121.4(11)
  C1c  C2c  C3c  .  .  .  118.8(13)
  C2c  C3c  C4c  .  .  .  119.5(14)
  C3c  C4c  C5c  .  .  .  123.1(12)
  C4c  C5c  C6c  .  .  .  118.6(13)
  N2c  C6c  C1c  .  .  .  106.7(11)
  N2c  C6c  C5c  .  .  .  134.7(14)
  C1c  C6c  C5c  .  .  .  118.2(13)
  N1c  C7c  N2c  .  .  .  111.9(12)
  N1c  C7c  C8c  .  .  .  124.4(11)
  N2c  C7c  C8c  .  .  .  123.4(14)
  O1c  C8c  C7c  .  .  .  110.7(12)
  O1c  C8c  C9c  .  .  .  113.2(10)
  C7c  C8c  C9c  .  .  .  114.4(13)
  O2c  C9c  C8c  .  .  .  108.6(11)
  O2c  C9c  C10c  .  .  .  112.5(15)
  C8c  C9c  C10c  .  .  .  116.0(13)
  N3c  C10c  N4c  .  .  .  108.8(13)
  N3c  C10c  C9c  .  .  .  129.7(16)
  N4c  C10c  C9c  .  .  .  121.3(13)
  N3c  C11c  C12c  .  .  .  134.8(17)
  N3c  C11c  C16c  .  .  .  107.3(13)
  C12c  C11c  C16c  .  .  .  117.9(17)
  C11c  C12c  C13c  .  .  .  117.3(16)
  C12c  C13c  C14c  .  .  .  124.2(18)
  C13c  C14c  C15c  .  .  .  119(2)
  C14c  C15c  C16c  .  .  .  117.2(19)
  N4c  C16c  C11c  .  .  .  105.0(16)
  N4c  C16c  C15c  .  .  .  130.3(17)
  C11c  C16c  C15c  .  .  .  124.7(16)
  Cu1  O1d  Cu3  .  .  .  81.3(4)
  Cu1  O1d  Cu4  .  .  .  101.1(4)
  Cu1  O1d  C8d  .  .  .  102.8(8)
  Cu3  O1d  Cu4  .  .  .  102.7(4)
  Cu3  O1d  C8d  .  .  .  131.5(10)
  Cu4  O1d  C8d  .  .  .  123.0(10)
  Cu1  N1d  C1d  .  .  .  130.6(10)
  Cu1  N1d  C7d  .  .  .  124.9(8)
  C1d  N1d  C7d  .  .  .  104.4(10)
  C6d  N2d  C7d  .  .  .  107.0(12)
  Cu3  N3d  C10d  .  .  .  122.0(11)
  Cu3  N3d  C11d  .  .  .  133.9(9)
  C10d  N3d  C11d  .  .  .  104.1(13)
  C10d  N4d  C16d  .  .  .  107.9(13)
  N1d  C1d  C2d  .  .  .  127.6(13)
  N1d  C1d  C6d  .  .  .  110.5(13)
  C2d  C1d  C6d  .  .  .  121.6(12)
  C1d  C2d  C3d  .  .  .  115.8(14)
  C2d  C3d  C4d  .  .  .  122.0(15)
  C3d  C4d  C5d  .  .  .  121.5(12)
  C4d  C5d  C6d  .  .  .  116.0(14)
  N2d  C6d  C1d  .  .  .  105.8(11)
  N2d  C6d  C5d  .  .  .  131.4(14)
  C1d  C6d  C5d  .  .  .  122.9(15)
  N1d  C7d  N2d  .  .  .  112.2(12)
  N1d  C7d  C8d  .  .  .  124.7(11)
  N2d  C7d  C8d  .  .  .  122.8(14)
  O1d  C8d  C7d  .  .  .  111.4(11)
  O1d  C8d  C9d  .  .  .  111.9(10)
  C7d  C8d  C9d  .  .  .  114.9(14)
  O2d  C9d  C8d  .  .  .  106.6(10)
  O2d  C9d  C10d  .  .  .  110.4(14)
  C8d  C9d  C10d  .  .  .  114.2(12)
  N3d  C10d  N4d  .  .  .  113.9(13)
  N3d  C10d  C9d  .  .  .  125.8(15)
  N4d  C10d  C9d  .  .  .  120.1(12)
  N3d  C11d  C12d  .  .  .  131.5(16)
  N3d  C11d  C16d  .  .  .  109.3(13)
  C12d  C11d  C16d  .  .  .  119.2(17)
  C11d  C12d  C13d  .  .  .  117.8(16)
  C12d  C13d  C14d  .  .  .  120.5(16)
  C13d  C14d  C15d  .  .  .  123.0(19)
  C14d  C15d  C16d  .  .  .  118.3(18)
  N4d  C16d  C11d  .  .  .  104.7(15)
  N4d  C16d  C15d  .  .  .  134.2(17)
  C11d  C16d  C15d  .  .  .  121.1(16)
  O1e  Cl1e  O2e  .  .  .  107.6(7)
  O1e  Cl1e  O3e  .  .  .  107.4(9)
  O1e  Cl1e  O4e  .  .  .  112.5(8)
  O2e  Cl1e  O3e  .  .  .  111.6(8)
  O2e  Cl1e  O4e  .  .  .  110.8(9)
  O3e  Cl1e  O4e  .  .  .  107.0(8)
  Cu3  O1e  Cl1e  .  .  .  133.3(7)
  Cu4  O4e  Cl1e  .  .  .  128.4(8)
  O1f  Cl1f  O2f  .  .  .  109.3(7)
  O1f  Cl1f  O3f  .  .  .  111.3(8)
  O1f  Cl1f  O4f  .  .  .  107.7(10)
  O2f  Cl1f  O3f  .  .  .  109.1(10)
  O2f  Cl1f  O4f  .  .  .  109.7(8)
  O3f  Cl1f  O4f  .  .  .  109.7(8)
  Cu1  O1f  Cl1f  .  .  .  133.0(7)
  Cu2  O3f  Cl1f  .  .  .  129.8(8)
  O1g  N1g  O2g  .  .  .  117.7(11)
  O1g  N1g  O3g  .  .  .  123.4(11)
  O2g  N1g  O3g  .  .  .  118.8(12)
  O1h  N1h  O2h  .  .  .  120(3)
  O1h  N1h  O3h  .  .  .  105(3)
  O2h  N1h  O3h  .  .  .  127(3)
  O1h'  N1h  O2h'  .  .  .  109(8)
  O1h'  N1h  O3h'  .  .  .  107(7)
  O2h'  N1h  O3h'  .  .  .  129(6)
 
 
loop_
_geom_torsion_atom_site_label_1
_geom_torsion_atom_site_label_2
_geom_torsion_atom_site_label_3
_geom_torsion_atom_site_label_4
_geom_torsion_site_symmetry_1
_geom_torsion_site_symmetry_2
_geom_torsion_site_symmetry_3
_geom_torsion_site_symmetry_4
_geom_torsion
  C7a  N1a  C1a  C2a  .  .  .  .  -176(3)
  C7a  N1a  C1a  C6a  .  .  .  .  0(2)
  C1a  N1a  C7a  N2a  .  .  .  .  -2(2)
  C1a  N1a  C7a  C8a  .  .  .  .  -175.9(15)
  C7a  N2a  C6a  C1a  .  .  .  .  -1(3)
  C7a  N2a  C6a  C5a  .  .  .  .  180(3)
  C6a  N2a  C7a  N1a  .  .  .  .  2(3)
  C6a  N2a  C7a  C8a  .  .  .  .  176.2(16)
  C11a  N3a  C10a  N4a  .  .  .  .  2.1(19)
  C11a  N3a  C10a  C9a  .  .  .  .  177.7(17)
  C10a  N3a  C11a  C12a  .  .  .  .  179(3)
  C10a  N3a  C11a  C16a  .  .  .  .  -4.1(19)
  C16a  N4a  C10a  N3a  .  .  .  .  0(3)
  C16a  N4a  C10a  C9a  .  .  .  .  -175.0(17)
  C10a  N4a  C16a  C11a  .  .  .  .  -3(3)
  C10a  N4a  C16a  C15a  .  .  .  .  -175(3)
  N1a  C1a  C2a  C3a  .  .  .  .  -179.4(19)
  C6a  C1a  C2a  C3a  .  .  .  .  4(4)
  N1a  C1a  C6a  N2a  .  .  .  .  0(3)
  N1a  C1a  C6a  C5a  .  .  .  .  179(2)
  C2a  C1a  C6a  N2a  .  .  .  .  177.4(19)
  C2a  C1a  C6a  C5a  .  .  .  .  -3(4)
  C1a  C2a  C3a  C4a  .  .  .  .  -1(4)
  C2a  C3a  C4a  C5a  .  .  .  .  -3(4)
  C3a  C4a  C5a  C6a  .  .  .  .  4(4)
  C4a  C5a  C6a  N2a  .  .  .  .  178(3)
  C4a  C5a  C6a  C1a  .  .  .  .  -1(4)
  N1a  C7a  C8a  O1a  .  .  .  .  16(3)
  N1a  C7a  C8a  C9a  .  .  .  .  -111.8(17)
  N2a  C7a  C8a  O1a  .  .  .  .  -157.5(15)
  N2a  C7a  C8a  C9a  .  .  .  .  74.6(19)
  O1a  C8a  C9a  O2a  .  .  .  .  -171.0(13)
  O1a  C8a  C9a  C10a  .  .  .  .  -49(2)
  C7a  C8a  C9a  O2a  .  .  .  .  -43.3(18)
  C7a  C8a  C9a  C10a  .  .  .  .  78.9(16)
  O2a  C9a  C10a  N3a  .  .  .  .  167.3(16)
  O2a  C9a  C10a  N4a  .  .  .  .  -17(3)
  C8a  C9a  C10a  N3a  .  .  .  .  42(3)
  C8a  C9a  C10a  N4a  .  .  .  .  -142.9(17)
  C16a  C11a  C12a  C13a  .  .  .  .  2(4)
  N3a  C11a  C16a  N4a  .  .  .  .  5(3)
  N3a  C11a  C16a  C15a  .  .  .  .  177(2)
  C12a  C11a  C16a  N4a  .  .  .  .  -178.0(18)
  C12a  C11a  C16a  C15a  .  .  .  .  -5(4)
  C11a  C12a  C13a  C14a  .  .  .  .  4(4)
  C12a  C13a  C14a  C15a  .  .  .  .  -6(5)
  C13a  C14a  C15a  C16a  .  .  .  .  2(5)
  C14a  C15a  C16a  N4a  .  .  .  .  174(3)
  C14a  C15a  C16a  C11a  .  .  .  .  4(4)
  C7b  N1b  C1b  C2b  .  .  .  .  180(2)
  C7b  N1b  C1b  C6b  .  .  .  .  4(3)
  C1b  N1b  C7b  N2b  .  .  .  .  -2.6(19)
  C1b  N1b  C7b  C8b  .  .  .  .  -177.4(17)
  C7b  N2b  C6b  C1b  .  .  .  .  2(3)
  C7b  N2b  C6b  C5b  .  .  .  .  180(3)
  C6b  N2b  C7b  N1b  .  .  .  .  0(2)
  C6b  N2b  C7b  C8b  .  .  .  .  175.2(17)
  C11b  N3b  C10b  N4b  .  .  .  .  .6(19)
  C11b  N3b  C10b  C9b  .  .  .  .  174.8(16)
  C10b  N3b  C11b  C12b  .  .  .  .  177(2)
  C10b  N3b  C11b  C16b  .  .  .  .  3(3)
  C16b  N4b  C10b  N3b  .  .  .  .  -3(2)
  C16b  N4b  C10b  C9b  .  .  .  .  -178.3(15)
  C10b  N4b  C16b  C11b  .  .  .  .  5(3)
  C10b  N4b  C16b  C15b  .  .  .  .  175(3)
  N1b  C1b  C2b  C3b  .  .  .  .  -179(2)
  C6b  C1b  C2b  C3b  .  .  .  .  -3(3)
  N1b  C1b  C6b  N2b  .  .  .  .  -4(3)
  N1b  C1b  C6b  C5b  .  .  .  .  178.2(19)
  C2b  C1b  C6b  N2b  .  .  .  .  -179.6(18)
  C2b  C1b  C6b  C5b  .  .  .  .  2(4)
  C1b  C2b  C3b  C4b  .  .  .  .  3(4)
  C2b  C3b  C4b  C5b  .  .  .  .  -2(5)
  C3b  C4b  C5b  C6b  .  .  .  .  0(4)
  C4b  C5b  C6b  N2b  .  .  .  .  -178(3)
  C4b  C5b  C6b  C1b  .  .  .  .  0(4)
  N1b  C7b  C8b  O1b  .  .  .  .  21(3)
  N1b  C7b  C8b  C9b  .  .  .  .  -108.6(17)
  N2b  C7b  C8b  O1b  .  .  .  .  -152.7(16)
  N2b  C7b  C8b  C9b  .  .  .  .  78(2)
  O1b  C8b  C9b  O2b  .  .  .  .  -167.9(12)
  O1b  C8b  C9b  C10b  .  .  .  .  -45.5(18)
  C7b  C8b  C9b  O2b  .  .  .  .  -39.1(16)
  C7b  C8b  C9b  C10b  .  .  .  .  83.2(14)
  O2b  C9b  C10b  N3b  .  .  .  .  162.6(16)
  O2b  C9b  C10b  N4b  .  .  .  .  -23.6(19)
  C8b  C9b  C10b  N3b  .  .  .  .  39(3)
  C8b  C9b  C10b  N4b  .  .  .  .  -147.0(15)
  N3b  C11b  C12b  C13b  .  .  .  .  -178(3)
  C16b  C11b  C12b  C13b  .  .  .  .  -4(4)
  N3b  C11b  C16b  N4b  .  .  .  .  -4(3)
  N3b  C11b  C16b  C15b  .  .  .  .  -175(3)
  C12b  C11b  C16b  N4b  .  .  .  .  -179.8(18)
  C12b  C11b  C16b  C15b  .  .  .  .  10(4)
  C11b  C12b  C13b  C14b  .  .  .  .  -2(4)
  C12b  C13b  C14b  C15b  .  .  .  .  3(5)
  C13b  C14b  C15b  C16b  .  .  .  .  1(4)
  C14b  C15b  C16b  N4b  .  .  .  .  -177(3)
  C14b  C15b  C16b  C11b  .  .  .  .  -8(4)
  C7c  N1c  C1c  C2c  .  .  .  .  -178.7(19)
  C7c  N1c  C1c  C6c  .  .  .  .  -1.3(18)
  C1c  N1c  C7c  N2c  .  .  .  .  1.5(19)
  C1c  N1c  C7c  C8c  .  .  .  .  -172.3(15)
  C7c  N2c  C6c  C1c  .  .  .  .  .2(19)
  C7c  N2c  C6c  C5c  .  .  .  .  -172(3)
  C6c  N2c  C7c  N1c  .  .  .  .  -1(2)
  C6c  N2c  C7c  C8c  .  .  .  .  172.8(15)
  C11c  N3c  C10c  N4c  .  .  .  .  .4(17)
  C11c  N3c  C10c  C9c  .  .  .  .  175.2(15)
  C10c  N3c  C11c  C12c  .  .  .  .  -180.0(18)
  C10c  N3c  C11c  C16c  .  .  .  .  -.2(17)
  C16c  N4c  C10c  N3c  .  .  .  .  -.4(17)
  C16c  N4c  C10c  C9c  .  .  .  .  -175.7(14)
  C10c  N4c  C16c  C11c  .  .  .  .  .3(17)
  C10c  N4c  C16c  C15c  .  .  .  .  -179.6(18)
  N1c  C1c  C2c  C3c  .  .  .  .  -175.9(18)
  C6c  C1c  C2c  C3c  .  .  .  .  7(3)
  N1c  C1c  C6c  N2c  .  .  .  .  .7(18)
  N1c  C1c  C6c  C5c  .  .  .  .  174.0(16)
  C2c  C1c  C6c  N2c  .  .  .  .  178.5(16)
  C2c  C1c  C6c  C5c  .  .  .  .  -8(3)
  C1c  C2c  C3c  C4c  .  .  .  .  -3(3)
  C2c  C3c  C4c  C5c  .  .  .  .  0(4)
  C3c  C4c  C5c  C6c  .  .  .  .  -1(3)
  C4c  C5c  C6c  N2c  .  .  .  .  176(2)
  C4c  C5c  C6c  C1c  .  .  .  .  5(3)
  N1c  C7c  C8c  O1c  .  .  .  .  19(3)
  N1c  C7c  C8c  C9c  .  .  .  .  -110.3(17)
  N2c  C7c  C8c  O1c  .  .  .  .  -154.0(15)
  N2c  C7c  C8c  C9c  .  .  .  .  76.7(19)
  O1c  C8c  C9c  O2c  .  .  .  .  -175.7(12)
  O1c  C8c  C9c  C10c  .  .  .  .  -47.8(17)
  C7c  C8c  C9c  O2c  .  .  .  .  -47.7(17)
  C7c  C8c  C9c  C10c  .  .  .  .  80.2(15)
  O2c  C9c  C10c  N3c  .  .  .  .  168.3(14)
  O2c  C9c  C10c  N4c  .  .  .  .  -17.5(19)
  C8c  C9c  C10c  N3c  .  .  .  .  42(3)
  C8c  C9c  C10c  N4c  .  .  .  .  -143.5(14)
  N3c  C11c  C12c  C13c  .  .  .  .  -179.5(17)
  C16c  C11c  C12c  C13c  .  .  .  .  0(3)
  N3c  C11c  C16c  N4c  .  .  .  .  -.0(17)
  N3c  C11c  C16c  C15c  .  .  .  .  179.9(17)
  C12c  C11c  C16c  N4c  .  .  .  .  179.8(14)
  C12c  C11c  C16c  C15c  .  .  .  .  0(3)
  C11c  C12c  C13c  C14c  .  .  .  .  0(3)
  C12c  C13c  C14c  C15c  .  .  .  .  0(4)
  C13c  C14c  C15c  C16c  .  .  .  .  0(3)
  C14c  C15c  C16c  N4c  .  .  .  .  179.5(18)
  C14c  C15c  C16c  C11c  .  .  .  .  0(3)
  C7d  N1d  C1d  C2d  .  .  .  .  173.5(17)
  C7d  N1d  C1d  C6d  .  .  .  .  -.1(18)
  C1d  N1d  C7d  N2d  .  .  .  .  1.5(18)
  C1d  N1d  C7d  C8d  .  .  .  .  -173.0(15)
  C7d  N2d  C6d  C1d  .  .  .  .  2.1(19)
  C7d  N2d  C6d  C5d  .  .  .  .  -177.3(19)
  C6d  N2d  C7d  N1d  .  .  .  .  -2.3(19)
  C6d  N2d  C7d  C8d  .  .  .  .  172.3(16)
  C11d  N3d  C10d  N4d  .  .  .  .  .6(16)
  C11d  N3d  C10d  C9d  .  .  .  .  175.8(13)
  C10d  N3d  C11d  C12d  .  .  .  .  178.2(16)
  C10d  N3d  C11d  C16d  .  .  .  .  -.5(16)
  C16d  N4d  C10d  N3d  .  .  .  .  -.5(17)
  C16d  N4d  C10d  C9d  .  .  .  .  -176.0(13)
  C10d  N4d  C16d  C11d  .  .  .  .  .1(17)
  C10d  N4d  C16d  C15d  .  .  .  .  -178(2)
  N1d  C1d  C2d  C3d  .  .  .  .  -174.6(17)
  C6d  C1d  C2d  C3d  .  .  .  .  -2(3)
  N1d  C1d  C6d  N2d  .  .  .  .  -1.2(19)
  N1d  C1d  C6d  C5d  .  .  .  .  178.2(17)
  C2d  C1d  C6d  N2d  .  .  .  .  -175.2(16)
  C2d  C1d  C6d  C5d  .  .  .  .  4(3)
  C1d  C2d  C3d  C4d  .  .  .  .  0(3)
  C2d  C3d  C4d  C5d  .  .  .  .  -2(4)
  C3d  C4d  C5d  C6d  .  .  .  .  4(3)
  C4d  C5d  C6d  N2d  .  .  .  .  174.1(19)
  C4d  C5d  C6d  C1d  .  .  .  .  -5(3)
  N1d  C7d  C8d  O1d  .  .  .  .  16(3)
  N1d  C7d  C8d  C9d  .  .  .  .  -112.7(16)
  N2d  C7d  C8d  O1d  .  .  .  .  -158.1(14)
  N2d  C7d  C8d  C9d  .  .  .  .  73.3(18)
  O1d  C8d  C9d  O2d  .  .  .  .  -172.5(12)
  O1d  C8d  C9d  C10d  .  .  .  .  -50.3(16)
  C7d  C8d  C9d  O2d  .  .  .  .  -44.2(16)
  C7d  C8d  C9d  C10d  .  .  .  .  78.0(14)
  O2d  C9d  C10d  N3d  .  .  .  .  165.0(13)
  O2d  C9d  C10d  N4d  .  .  .  .  -20.1(17)
  C8d  C9d  C10d  N3d  .  .  .  .  44.9(18)
  C8d  C9d  C10d  N4d  .  .  .  .  -140.1(13)
  N3d  C11d  C12d  C13d  .  .  .  .  -177.4(15)
  C16d  C11d  C12d  C13d  .  .  .  .  1(3)
  N3d  C11d  C16d  N4d  .  .  .  .  .2(17)
  N3d  C11d  C16d  C15d  .  .  .  .  179.0(16)
  C12d  C11d  C16d  N4d  .  .  .  .  -178.6(14)
  C12d  C11d  C16d  C15d  .  .  .  .  0(3)
  C11d  C12d  C13d  C14d  .  .  .  .  -3(3)
  C12d  C13d  C14d  C15d  .  .  .  .  3(3)
  C13d  C14d  C15d  C16d  .  .  .  .  -2(3)
  C14d  C15d  C16d  N4d  .  .  .  .  178.5(19)
  C14d  C15d  C16d  C11d  .  .  .  .  0(3)

#==END====================================================


data_turq
 
#-- [Cu4(C18H17N4O2)2(C18H16N4O2)Cl2](ClO4)2(H2O)2(C2H6O) ------------------ 
 
_audit_creation_date               2000-12-20
_audit_creation_method             from_xtal_archive_file_using_CIFIO
_audit_update_record               '2004-07-08'
_audit_conform_dict_name           'cif_core.dic'
_audit_conform_dict_version        '2.0.1'
 
#--------------------------------------------------------------------------- 
 
_publ_requested_journal            'Inorg. Chem.'
 
 
_publ_contact_author                                                   

;
     Alan F. Williams'
     Department of Inorganic, Analytical and  Applied Chemistry
     University of Geneva
     30, quai E. Ansermet
     CH - 1211 Geneva 4
     Switzerland
;

_publ_contact_author_email          Alan.Williams@chiam.unige.ch
_publ_contact_author_phone          '41 22 379 64 25'
_publ_contact_author_fax            '41 22 379 68 30'
 
 
  
loop_
_publ_author_name
_publ_author_address
 
   ' Katharina Isele'
;    Department of Inorganic, Analytical and  Applied Chemistry
     University of Geneva
     30, quai E. Ansermet
     CH - 1211 Geneva 4
     Switzerland
;

   ' Patrick Franz'
;    Department of Chemistry
     Universitat Bern
     Freistrasse 9
     CH - 3009 Bern
     Switzerland
;

   ' Gerald Bernardinelli'
;    Laboratoiry of X-ray Crystallography
     University de Geneva
     24, quai E. Ansermet
     CH - 1211 Geneva 4
     Switzerland
;

   ' Silvio Decurtins'
;    Department of Chemistry
     Universitat Bern
     Freistrasse 9
     CH - 3009 Bern
     Switzerland
;

   ' Alan F. Williams'
;    Department of Inorganic, Analytical and  Applied Chemistry
     University of Geneva
     30, quai E. Ansermet
     CH - 1211 Geneva 4
     Switzerland
;


_publ_section_title
;
Self-assembly and Interconversion of Tetranuclear Copper(II) Complexes
;
 
_chemical_formula_moiety           
'Cu4 (C18 H17 N4 O2)2 Cl2; (C18 H16 N4 O2) ; (Cl O4)2 ; (C2 H6 O) ; (H2 O)2'

_chemical_formula_sum              'C56 H60 Cl4 Cu4 N12 O17'
_chemical_formula_weight           1569.2
_chemical_absolute_configuration   ad  
 
_symmetry_cell_setting             orthorhombic
_symmetry_space_group_name_H-M     'P 21 21 21'
_symmetry_space_group_name_Hall    'P 2AC 2AB'

loop_
_symmetry_equiv_pos_as_xyz
  +x,+y,+z  1/2-x,-y,1/2+z  1/2+x,1/2-y,-z  -x,1/2+y,1/2-z
_cell_length_a                     15.4291(10)
_cell_length_b                     16.9541(8)
_cell_length_c                     25.2232(9)
_cell_angle_alpha                  90.00000
_cell_angle_beta                   90.00000
_cell_angle_gamma                  90.00000
_cell_volume                       6598.1(6)
_cell_formula_units_Z              4
_exptl_crystal_density_diffrn        1.58
_exptl_crystal_density_meas        not_measured
_diffrn_radiation_type             'MoK\a'
_diffrn_radiation_wavelength       .71073
_cell_measurement_reflns_used      7998
_cell_measurement_theta_min        3.7
_cell_measurement_theta_max        25.5
_cell_measurement_temperature      200
_exptl_absorpt_coefficient_mu      1.51
_exptl_crystal_F_000               3200
_exptl_crystal_description         prism
_exptl_crystal_size_max            .24
_exptl_crystal_size_mid            .17
_exptl_crystal_size_min            .10
_exptl_crystal_colour              'green-blue'
 
_diffrn_measurement_device_type    'Stoe Ipds'
_diffrn_measurement_method         \f
_diffrn_detector_area_resol_mean   6
_exptl_absorpt_correction_type     numerical
_exptl_absorpt_process_details     'XRED; Stoe & Cie, 1999'
_exptl_absorpt_correction_T_min    .4691
_exptl_absorpt_correction_T_max    .8640
_diffrn_reflns_number              83120
_reflns_number_total               12315
_reflns_number_gt                  7449
_reflns_Friedel_coverage           .917   
_reflns_threshold_expression       'refl observed if Fo > 3.99 \s(Fo)'
_diffrn_reflns_theta_max             25.5
_diffrn_measured_fraction_theta_max  .961
_diffrn_reflns_theta_full            25.5
_diffrn_measured_fraction_theta_full .961
_diffrn_reflns_av_R_equivalents       .063
_diffrn_reflns_limit_h_min         -18
_diffrn_reflns_limit_h_max         18
_diffrn_reflns_limit_k_min         -20
_diffrn_reflns_limit_k_max         20
_diffrn_reflns_limit_l_min         -30
_diffrn_reflns_limit_l_max         30
_diffrn_standards_decay_%          0
 
_refine_ls_structure_factor_coef   F
_refine_ls_R_factor_gt                .043
_refine_ls_wR_factor_ref              .048
_refine_ls_goodness_of_fit_ref       1.976
_refine_ls_number_reflns           7449
_refine_ls_number_parameters       827
_refine_ls_weighting_scheme        calc
_refine_ls_weighting_details       '\w=1/[\s^2^(Fo)+0.0003(Fo^2^)]'
_refine_ls_hydrogen_treatment      noref
_refine_ls_shift/su_max               .0792
_refine_diff_density_max             1.077
_refine_diff_density_min              -.504
_refine_ls_extinction_method       none
_refine_ls_extinction_coef         .00000
_refine_ls_abs_structure_details   Flack_xabs_refined
_refine_ls_abs_structure_Flack     -.01(2)


_refine_special_details
;
Disorders:
   The EtOH molecule (h) is disordered with the central carbon atom 
   located on two distinct sites with population parameters of 0.5/0.5.
   The water molecules O2w and O3w are disordered and refined with 
   population parameters of 0.75 and 0.25 respectively. 

Hydrogen treatment:
   Hydrogen atoms of water molecules, EtOH and -OH groups of the ligands
   have not been observed nor calculated excepted for H02c which has been
   observed, refined and blocked in the last cycles. 
   (=> i.e. 11 H less by asymmetric unit) 

   Other hydrogen atomic coordinates have been calculated.
;

_computing_data_collection         'EXPOSE (Stoe & Cie, 1999)'
_computing_cell_refinement         'CELL (Stoe & Cie, 1999)'
_computing_data_reduction          'XRED (Stoe & Cie, 1999)'
_computing_structure_solution      'Multan_87'
_computing_structure_refinement    xtal_CRYLSQ
_computing_molecular_graphics      xtal_gx3
_computing_publication_material    xtal_CIFIO
 
 
 
loop_
_atom_type_symbol
_atom_type_scat_source
_atom_type_scat_dispersion_real
_atom_type_scat_dispersion_imag
  C  Int._Tables_Vol_IV_Tables_2.2B_and_2.3.1  .002  .002
  H  Int._Tables_Vol_IV_Tables_2.2B_and_2.3.1  0  0
  N  Int._Tables_Vol_IV_Tables_2.2B_and_2.3.1  .004  .003
  O  Int._Tables_Vol_IV_Tables_2.2B_and_2.3.1  .008  .006
  Cl  Int._Tables_Vol_IV_Tables_2.2B_and_2.3.1  .132  .159
  Cu  Int._Tables_Vol_IV_Tables_2.2B_and_2.3.1  .263   1.266
 
 
loop_
_atom_site_label
_atom_site_fract_x
_atom_site_fract_y
_atom_site_fract_z
_atom_site_U_iso_or_equiv
_atom_site_occupancy
_atom_site_adp_type
  Cu1  .43157(10)  .83489(8)  .33675(6)  .0377(8)  1.00000  Uani
  Cu2  .30434(10)  .77841(8)  .25160(6)  .0405(8)  1.00000  Uani
  Cu3  .36953(10)  .93756(8)  .45249(6)  .0408(9)  1.00000  Uani
  Cu4  .24840(10)  .91947(8)  .36015(6)  .0426(9)  1.00000  Uani
  O1a  .3882(5)  .8593(4)  .2681(3)  .039(5)  1.00000  Uani
  O2a  .5473(6)  .8242(5)  .2096(4)  .051(6)  1.00000  Uani
  N1a  .3257(7)  .8169(5)  .1797(4)  .040(6)  1.00000  Uani
  N2a  .3739(7)  .9184(5)  .1303(4)  .043(6)  1.00000  Uani
  N3a  .5328(6)  .9041(5)  .3243(4)  .036(6)  1.00000  Uani
  N4a  .6329(7)  .9711(5)  .2789(5)  .045(7)  1.00000  Uani
  C1a  .3750(8)  .8819(6)  .1779(5)  .037(7)  1.00000  Uani
  C2a  .2893(8)  .8106(7)  .1286(5)  .045(8)  1.00000  Uani
  C3a  .2350(10)  .7547(7)  .1070(6)  .057(9)  1.00000  Uani
  C4a  .2088(10)  .7668(9)  .0540(7)  .068(11)  1.00000  Uani
  C5a  .2368(11)  .8310(8)  .0252(6)  .064(10)  1.00000  Uani
  C6a  .2928(10)  .8856(7)  .0455(6)  .052(9)  1.00000  Uani
  C7a  .3193(8)  .8738(7)  .0967(6)  .045(8)  1.00000  Uani
  C8a  .4115(10)  .9945(7)  .1168(6)  .053(9)  1.00000  Uani
  C9a  .4199(8)  .9071(6)  .2275(5)  .035(7)  1.00000  Uani
  C10a  .5215(9)  .9022(6)  .2239(5)  .041(7)  1.00000  Uani
  C11a  .5622(8)  .9252(6)  .2760(5)  .037(7)  1.00000  Uani
  C12a  .5904(8)  .9408(6)  .3606(6)  .043(8)  1.00000  Uani
  C13a  .5923(8)  .9393(7)  .4162(5)  .045(8)  1.00000  Uani
  C14a  .6567(9)  .9821(8)  .4409(6)  .050(9)  1.00000  Uani
  C15a  .7161(10)  1.0270(9)  .4102(7)  .065(11)  1.00000  Uani
  C16a  .7174(9)  1.0259(7)  .3573(7)  .054(9)  1.00000  Uani
  C17a  .6527(8)  .9828(7)  .3325(6)  .041(8)  1.00000  Uani
  C18a  .6915(9)  .9978(7)  .2348(6)  .048(8)  1.00000  Uani
  O1b  .3190(5)  .7777(5)  .3291(4)  .040(5)  1.00000  Uani
  O2b  .2929(6)  .8592(4)  .4223(4)  .045(5)  1.00000  Uani
  N1b  .1560(7)  .8433(6)  .3517(4)  .042(6)  1.00000  Uani
  N2b  .1028(7)  .7227(7)  .3697(5)  .053(7)  1.00000  Uani
  N3b  .4564(7)  .7779(6)  .4032(4)  .043(6)  1.00000  Uani
  N4b  .4172(7)  .6998(6)  .4691(4)  .046(7)  1.00000  Uani
  C1b  .1754(8)  .7676(7)  .3631(6)  .046(8)  1.00000  Uani
  C2b  .0659(9)  .8460(8)  .3500(5)  .048(8)  1.00000  Uani
  C3b  .0083(10)  .9093(8)  .3412(7)  .061(10)  1.00000  Uani
  C4b  -.0775(11)  .8935(9)  .3409(7)  .067(11)  1.00000  Uani
  C5b  -.1097(9)  .8175(10)  .3512(7)  .069(11)  1.00000  Uani
  C6b  -.0558(10)  .7535(9)  .3608(7)  .064(10)  1.00000  Uani
  C7b  .0333(9)  .7702(8)  .3615(6)  .053(9)  1.00000  Uani
  C8b  .1022(12)  .6385(9)  .3794(8)  .086(13)  1.00000  Uani
  C9b  .2674(8)  .7433(6)  .3685(5)  .040(8)  1.00000  Uani
  C10b  .2990(8)  .7769(6)  .4240(5)  .038(7)  1.00000  Uani
  C11b  .3903(9)  .7515(6)  .4325(5)  .042(8)  1.00000  Uani
  C12b  .5303(9)  .7409(6)  .4225(5)  .042(8)  1.00000  Uani
  C13b  .6164(9)  .7454(7)  .4063(6)  .047(8)  1.00000  Uani
  C14b  .6759(9)  .7003(7)  .4347(6)  .050(9)  1.00000  Uani
  C15b  .6531(9)  .6535(8)  .4771(6)  .053(9)  1.00000  Uani
  C16b  .5675(12)  .6485(7)  .4931(6)  .062(10)  1.00000  Uani
  C17b  .5072(9)  .6923(6)  .4632(5)  .046(8)  1.00000  Uani
  C18b  .3644(10)  .6624(8)  .5104(6)  .061(9)  1.00000  Uani
  O1c  .3535(6)  .9729(5)  .3791(4)  .046(6)  1.00000  Uani
  O2c  .2609(9)  1.1292(7)  .3834(5)  .087(9)  1.00000  Uani
  N1c  .4285(7)  1.0373(5)  .4594(4)  .042(6)  1.00000  Uani
  N2c  .4827(8)  1.1437(6)  .4178(5)  .057(8)  1.00000  Uani
  N3c  .2313(7)  .9933(6)  .3007(5)  .045(7)  1.00000  Uani
  N4c  .2572(8)  1.1007(6)  .2515(5)  .059(7)  1.00000  Uani
  C1c  .4304(9)  1.0791(7)  .4137(6)  .047(8)  1.00000  Uani
  C2c  .4832(9)  1.0785(7)  .4951(6)  .049(8)  1.00000  Uani
  C3c  .5114(10)  1.0590(8)  .5456(6)  .057(9)  1.00000  Uani
  C4c  .5703(12)  1.1086(9)  .5688(7)  .073(11)  1.00000  Uani
  C5c  .6036(12)  1.1737(11)  .5429(8)  .091(14)  1.00000  Uani
  C6c  .5777(13)  1.1945(8)  .4924(7)  .081(12)  1.00000  Uani
  C7c  .5170(10)  1.1448(8)  .4689(6)  .054(9)  1.00000  Uani
  C8c  .5055(13)  1.1991(10)  .3750(7)  .085(13)  1.00000  Uani
  C9c  .3832(9)  1.0484(6)  .3651(6)  .046(8)  1.00000  Uani
  C10c  .3149(12)  1.1032(7)  .3447(8)  .073(11)  1.00000  Uani
  C11c  .2673(9)  1.0659(7)  .2998(6)  .051(9)  1.00000  Uani
  C12c  .1984(9)  .9817(7)  .2501(6)  .047(8)  1.00000  Uani
  C13c  .1558(9)  .9170(8)  .2268(6)  .056(9)  1.00000  Uani
  C14c  .1352(11)  .9234(10)  .1744(7)  .072(11)  1.00000  Uani
  C15c  .1530(10)  .9899(11)  .1441(7)  .067(11)  1.00000  Uani
  C16c  .1941(10)  1.0533(10)  .1658(7)  .071(11)  1.00000  Uani
  C17c  .2136(9)  1.0488(8)  .2191(6)  .056(9)  1.00000  Uani
  C18c  .2819(12)  1.1812(10)  .2354(8)  .094(14)  1.00000  Uani
  Cl1d  .1925(3)  .69723(17)  .24261(14)  .053(2)  1.00000  Uani
  Cl1e  .3944(3)  .88046(17)  .52948(13)  .052(2)  1.00000  Uani
  Cl1f  .3324(4)  .4642(4)  .4296(3)  .111(5)  1.00000  Uani
  O1f  .2685(14)  .5275(13)  .4157(10)  .20(3)  1.00000  Uani
  O2f  .2990(14)  .4101(11)  .4655(7)  .167(16)  1.00000  Uani
  O3f  .4078(14)  .5055(15)  .4604(12)  .23(3)  1.00000  Uani
  O4f  .3677(14)  .4235(14)  .3879(8)  .191(19)  1.00000  Uani
  Cl1g  .4757(3)  .64748(15)  .28062(13)  .0470(18)  1.00000  Uani
  O1g  .4076(6)  .6631(5)  .2435(4)  .053(6)  1.00000  Uani
  O2g  .5193(6)  .7210(5)  .2934(4)  .053(6)  1.00000  Uani
  O3g  .4413(7)  .6137(5)  .3283(5)  .067(7)  1.00000  Uani
  O4g  .5380(6)  .5949(5)  .2570(4)  .060(6)  1.00000  Uani
  O1h  .5055(15)  .4628(12)  .5401(9)  .179(8)  1.00000  Uiso
  C1h  .505(3)  .3794(18)  .5495(16)  .106(13)  .50000  Uiso
  C1h'  .447(3)  .420(4)  .569(3)  .19(3)  .50000  Uiso
  C2h  .491(4)  .370(3)  .6057(17)  .25(2)  1.00000  Uiso
  O1w  .1755(10)  1.0028(8)  .4263(6)  .110(11)  1.00000  Uani
  O2w  .7436(18)  .7858(15)  .1446(12)  .177(10)  .75000  Uiso
  O3w  .911(5)  .792(5)  .196(4)  .16(3)  .25000  Uiso
  H02c  .25129  1.08648  .40262  .05000  1.00000  Uiso
  H3a  .21348  .70365  .12961  .05000  1.00000  Uiso
  H4a  .16523  .72408  .03524  .05000  1.00000  Uiso
  H5a  .21323  .83864  -.01525  .05000  1.00000  Uiso
  H6a  .31475  .93579  .02232  .05000  1.00000  Uiso
  H81a  .44488  .98954  .08400  .05000  1.00000  Uiso
  H82a  .36518  1.03318  .11175  .05000  1.00000  Uiso
  H83a  .44964  1.01191  .14539  .05000  1.00000  Uiso
  H9a  .40660  .96938  .23459  .05000  1.00000  Uiso
  H10a  .54326  .94326  .19370  .05000  1.00000  Uiso
  H13a  .54468  .90532  .43866  .05000  1.00000  Uiso
  H14a  .66262  .98128  .48395  .05000  1.00000  Uiso
  H15a  .76245  1.06435  .43083  .05000  1.00000  Uiso
  H16a  .76700  1.05758  .33452  .05000  1.00000  Uiso
  H181a  .73144  .95539  .22564  .05000  1.00000  Uiso
  H182a  .65647  1.01139  .20364  .05000  1.00000  Uiso
  H183a  .72416  1.04383  .24618  .05000  1.00000  Uiso
  H3b  .03267  .96918  .33498  .05000  1.00000  Uiso
  H4b  -.12306  .94078  .33235  .05000  1.00000  Uiso
  H5b  -.17920  .80793  .35120  .05000  1.00000  Uiso
  H6b  -.08068  .69445  .36803  .05000  1.00000  Uiso
  H81b  .06879  .62737  .41157  .05000  1.00000  Uiso
  H82b  .07539  .61118  .34897  .05000  1.00000  Uiso
  H83b  .16222  .61953  .38403  .05000  1.00000  Uiso
  H9b  .27270  .67925  .36493  .05000  1.00000  Uiso
  H10b  .25983  .75483  .45669  .05000  1.00000  Uiso
  H13b  .63671  .78230  .37325  .05000  1.00000  Uiso
  H14b  .74362  .70199  .42222  .05000  1.00000  Uiso
  H15b  .70260  .61994  .49806  .05000  1.00000  Uiso
  H16b  .54798  .61316  .52682  .05000  1.00000  Uiso
  H181b  .34707  .70199  .53641  .05000  1.00000  Uiso
  H182b  .31295  .63918  .49436  .05000  1.00000  Uiso
  H183b  .39847  .62090  .52807  .05000  1.00000  Uiso
  H3c  .48744  1.00669  .56611  .05000  1.00000  Uiso
  H4c  .59259  1.09575  .60881  .05000  1.00000  Uiso
  H5c  .65085  1.21034  .56346  .05000  1.00000  Uiso
  H6c  .60288  1.24614  .47215  .05000  1.00000  Uiso
  H81c  .47960  1.25022  .38233  .05000  1.00000  Uiso
  H82c  .56885  1.20461  .37317  .05000  1.00000  Uiso
  H83c  .48354  1.17898  .34106  .05000  1.00000  Uiso
  H9c  .42627  1.04488  .33102  .05000  1.00000  Uiso
  H10c  .34697  1.15596  .32950  .05000  1.00000  Uiso
  H13c  .14031  .86444  .24963  .05000  1.00000  Uiso
  H14c  .10278  .87400  .15530  .05000  1.00000  Uiso
  H15c  .13347  .99149  .10263  .05000  1.00000  Uiso
  H16c  .21181  1.10484  .14219  .05000  1.00000  Uiso
  H181c  .24499  1.21964  .25371  .05000  1.00000  Uiso
  H182c  .34295  1.19069  .24474  .05000  1.00000  Uiso
  H183c  .27455  1.18680  .19717  .05000  1.00000  Uiso
 
 
 
loop_
_atom_site_aniso_label
_atom_site_aniso_U_11
_atom_site_aniso_U_22
_atom_site_aniso_U_33
_atom_site_aniso_U_12
_atom_site_aniso_U_13
_atom_site_aniso_U_23
  Cu1  .0444(8)  .0393(7)  .0293(9)  -.0010(7)  .0001(7)  .0028(6)
  Cu2  .0497(9)  .0387(7)  .0329(9)  -.0036(7)  -.0021(8)  .0027(6)
  Cu3  .0511(9)  .0400(7)  .0312(9)  -.0018(7)  .0033(7)  .0031(6)
  Cu4  .0522(9)  .0430(7)  .0327(9)  -.0023(7)  -.0005(8)  .0066(6)
  O1a  .054(5)  .037(4)  .027(5)  .001(4)  .003(4)  .002(3)
  O2a  .072(7)  .043(5)  .037(6)  .014(4)  .007(5)  -.012(4)
  N1a  .049(7)  .033(5)  .039(7)  -.002(5)  -.003(5)  .002(4)
  N2a  .060(7)  .037(5)  .032(7)  .003(5)  -.005(5)  .005(5)
  N3a  .050(7)  .036(5)  .023(7)  .006(5)  -.003(5)  -.004(4)
  N4a  .044(6)  .030(5)  .060(9)  -.002(5)  .002(6)  .000(5)
  C1a  .041(7)  .038(6)  .033(9)  .008(6)  .003(6)  .004(5)
  C2a  .048(8)  .050(7)  .036(9)  .001(6)  -.007(6)  .002(6)
  C3a  .065(10)  .053(7)  .055(11)  -.008(7)  -.017(8)  -.004(6)
  C4a  .068(10)  .077(10)  .061(12)  -.003(8)  -.010(9)  -.009(8)
  C5a  .080(11)  .057(8)  .053(10)  .006(8)  -.004(8)  -.002(7)
  C6a  .066(9)  .057(8)  .033(9)  .000(7)  -.003(7)  .004(6)
  C7a  .051(8)  .042(7)  .043(9)  .003(6)  -.007(7)  .004(6)
  C8a  .072(10)  .039(7)  .047(9)  -.008(6)  .003(7)  .016(6)
  C9a  .039(7)  .033(6)  .035(8)  .002(5)  .001(6)  -.001(5)
  C10a  .054(8)  .032(6)  .036(8)  .005(6)  .002(6)  .002(5)
  C11a  .041(7)  .030(6)  .041(8)  .001(6)  .001(6)  -.006(5)
  C12a  .046(8)  .037(6)  .045(9)  .010(6)  -.006(6)  -.008(6)
  C13a  .049(8)  .051(7)  .034(9)  .008(6)  .003(6)  -.002(6)
  C14a  .055(9)  .059(8)  .036(10)  -.007(7)  -.008(7)  -.016(6)
  C15a  .062(11)  .072(10)  .060(13)  .006(8)  -.005(8)  -.009(8)
  C16a  .046(9)  .051(7)  .066(12)  -.005(6)  -.005(7)  -.002(7)
  C17a  .040(8)  .041(6)  .042(9)  .001(6)  -.005(7)  -.004(6)
  C18a  .050(8)  .045(7)  .051(10)  -.002(6)  .019(7)  .004(6)
  O1b  .040(5)  .047(4)  .033(6)  -.002(4)  .003(4)  .000(4)
  O2b  .057(6)  .039(5)  .040(6)  .000(4)  -.001(5)  .005(4)
  N1b  .049(7)  .044(6)  .033(7)  .001(5)  .005(5)  .001(5)
  N2b  .047(7)  .066(7)  .046(8)  -.015(6)  .005(5)  .021(6)
  N3b  .048(7)  .046(6)  .035(7)  -.000(5)  -.005(5)  .005(5)
  N4b  .060(8)  .049(6)  .029(7)  -.001(5)  .004(5)  .009(5)
  C1b  .050(8)  .050(7)  .036(8)  .003(6)  .011(6)  .014(6)
  C2b  .052(8)  .064(8)  .029(9)  -.006(7)  .001(6)  -.003(6)
  C3b  .065(10)  .058(8)  .061(11)  .008(7)  -.002(8)  -.000(7)
  C4b  .058(11)  .090(11)  .053(11)  .014(9)  -.005(8)  .002(8)
  C5b  .042(9)  .113(13)  .053(12)  -.004(9)  .005(7)  .007(9)
  C6b  .048(9)  .086(10)  .059(11)  -.009(8)  .006(8)  .012(8)
  C7b  .052(9)  .067(8)  .038(9)  .002(7)  .005(7)  .006(7)
  C8b  .086(12)  .060(9)  .114(16)  -.010(9)  .002(11)  .039(9)
  C9b  .044(8)  .039(6)  .036(8)  -.004(5)  -.002(6)  .006(5)
  C10b  .048(7)  .033(6)  .032(7)  -.002(6)  .002(6)  .002(5)
  C11b  .054(9)  .039(6)  .034(9)  -.001(6)  -.006(6)  .003(5)
  C12b  .057(9)  .039(7)  .028(8)  .009(6)  -.003(6)  -.006(5)
  C13b  .046(9)  .045(7)  .049(10)  .006(6)  -.009(7)  -.008(6)
  C14b  .059(9)  .045(7)  .047(10)  .007(6)  -.015(7)  -.013(6)
  C15b  .055(9)  .058(8)  .045(10)  .011(7)  -.013(7)  -.007(7)
  C16b  .100(13)  .042(7)  .045(10)  .018(8)  -.022(9)  -.002(6)
  C17b  .065(10)  .036(6)  .036(9)  .008(6)  -.009(7)  -.002(5)
  C18b  .065(9)  .053(7)  .065(11)  .001(7)  .016(8)  .027(7)
  O1c  .064(6)  .045(5)  .029(6)  -.012(4)  .008(4)  .009(4)
  O2c  .109(9)  .087(7)  .064(9)  .017(7)  .005(7)  .001(6)
  N1c  .064(7)  .038(5)  .025(7)  .001(5)  .011(5)  -.004(4)
  N2c  .071(8)  .050(6)  .050(9)  -.015(6)  -.002(6)  .011(5)
  N3c  .044(7)  .049(6)  .041(8)  .005(5)  .001(5)  .001(5)
  N4c  .060(7)  .054(6)  .063(9)  .013(6)  .004(7)  .023(6)
  C1c  .050(8)  .039(6)  .052(9)  -.001(6)  .005(7)  .002(6)
  C2c  .058(9)  .048(7)  .042(9)  .007(7)  .006(7)  -.005(6)
  C3c  .064(9)  .058(7)  .049(10)  -.006(7)  -.002(8)  .003(7)
  C4c  .091(12)  .071(9)  .057(12)  -.018(9)  -.012(9)  .009(8)
  C5c  .099(14)  .106(13)  .068(14)  -.051(11)  -.005(10)  -.004(10)
  C6c  .120(15)  .063(9)  .059(13)  -.050(10)  -.012(10)  .005(7)
  C7c  .061(9)  .056(8)  .045(11)  -.010(7)  -.003(7)  -.005(6)
  C8c  .118(15)  .087(11)  .050(12)  -.044(11)  -.011(10)  .032(8)
  C9c  .064(9)  .029(6)  .045(9)  .000(6)  .006(7)  .007(5)
  C10c  .093(12)  .045(8)  .082(14)  .007(8)  -.018(10)  -.015(8)
  C11c  .056(9)  .044(7)  .053(10)  .014(6)  -.007(7)  .003(6)
  C12c  .051(8)  .061(8)  .029(8)  .014(7)  .003(7)  .005(6)
  C13c  .066(9)  .054(8)  .049(10)  .013(7)  -.012(7)  .004(7)
  C14c  .068(10)  .087(11)  .061(13)  .018(9)  -.015(9)  -.021(9)
  C15c  .066(11)  .094(11)  .041(11)  .015(9)  .003(8)  .017(9)
  C16c  .060(10)  .095(11)  .059(11)  .016(9)  .001(9)  .037(9)
  C17c  .048(9)  .065(8)  .056(11)  .014(7)  -.003(7)  .025(7)
  C18c  .079(12)  .080(11)  .125(18)  .009(9)  .003(11)  .058(11)
  Cl1d  .0549(19)  .0531(16)  .052(3)  -.0107(15)  -.0043(17)  .0010(14)
  Cl1e  .068(3)  .0512(17)  .035(3)  -.0065(15)  -.0047(15)  .0076(13)
  Cl1f  .104(4)  .137(5)  .091(5)  -.001(4)  .023(4)  .004(4)
  O1f  .165(18)  .24(3)  .21(3)  .117(18)  -.017(16)  .029(17)
  O2f  .204(19)  .187(16)  .110(15)  -.049(15)  .069(14)  .037(12)
  O3f  .143(17)  .24(3)  .30(4)  -.011(17)  -.052(19)  -.12(3)
  O4f  .187(18)  .27(3)  .121(17)  .074(18)  .031(13)  -.092(16)
  Cl1g  .061(2)  .0333(14)  .046(3)  -.0005(13)  -.0036(16)  .0041(13)
  O1g  .057(6)  .044(5)  .059(7)  .005(4)  -.015(5)  .000(5)
  O2g  .062(6)  .037(4)  .060(7)  .003(4)  -.010(5)  -.016(4)
  O3g  .082(7)  .055(5)  .065(8)  -.001(5)  .004(6)  .015(5)
  O4g  .077(7)  .041(5)  .063(7)  .016(5)  -.001(6)  -.012(4)
  O1w  .133(12)  .109(9)  .087(11)  .010(9)  .032(9)  -.009(8)
 
 
 
loop_
_geom_bond_atom_site_label_1
_geom_bond_atom_site_label_2
_geom_bond_site_symmetry_1
_geom_bond_site_symmetry_2
_geom_bond_distance
  Cu1  Cu2  .  .  3.063(3)
  Cu1  Cu3  .  .  3.531(3)
  Cu1  Cu4  .  .  3.224(3)
  Cu1  O1a  .  .  1.901(8)
  Cu1  N3a  .  .  1.979(9)
  Cu1  O1b  .  .  1.998(8)
  Cu1  N3b  .  .  1.972(10)
  Cu1  O2g  .  .  2.599(8)
  Cu2  O1a  .  .  1.931(8)
  Cu2  N1a  .  .  1.955(10)
  Cu2  O1b  .  .  1.967(8)
  Cu2  Cl1d  .  .  2.219(4)
  Cu2  O1g  .  .  2.531(8)
  Cu3  Cu4  .  .  3.002(3)
  Cu3  O2b  .  .  1.935(8)
  Cu3  O1c  .  .  1.962(8)
  Cu3  N1c  .  .  1.928(9)
  Cu3  Cl1e  .  .  2.204(4)
  Cu4  O2b  .  .  1.993(8)
  Cu4  N1b  .  .  1.936(10)
  Cu4  O1c  .  .  1.919(9)
  Cu4  N3c  .  .  1.972(10)
  Cu4  O1w  .  .  2.458(14)
  O1a  C9a  .  .  1.395(13)
  O2a  C10a  .  .  1.427(13)
  N1a  C1a  .  .  1.340(14)
  N1a  C2a  .  .  1.411(16)
  N2a  C1a  .  .  1.352(15)
  N2a  C7a  .  .  1.414(16)
  N2a  C8a  .  .  1.456(15)
  N3a  C11a  .  .  1.349(15)
  N3a  C12a  .  .  1.420(15)
  N4a  C11a  .  .  1.342(15)
  N4a  C17a  .  .  1.400(18)
  N4a  C18a  .  .  1.502(17)
  C1a  C9a  .  .  1.493(16)
  C2a  C3a  .  .  1.378(18)
  C2a  C7a  .  .  1.418(17)
  C3a  C4a  .  .  1.41(3)
  C4a  C5a  .  .  1.38(3)
  C5a  C6a  .  .  1.37(2)
  C6a  C7a  .  .  1.368(19)
  C9a  C10a  .  .  1.572(17)
  C10a  C11a  .  .  1.507(17)
  C12a  C13a  .  .  1.402(19)
  C12a  C17a  .  .  1.392(17)
  C13a  C14a  .  .  1.379(18)
  C14a  C15a  .  .  1.42(2)
  C15a  C16a  .  .  1.34(3)
  C16a  C17a  .  .  1.386(18)
  O1b  C9b  .  .  1.402(14)
  O2b  C10b  .  .  1.398(12)
  N1b  C1b  .  .  1.348(15)
  N1b  C2b  .  .  1.391(16)
  N2b  C1b  .  .  1.364(16)
  N2b  C7b  .  .  1.357(17)
  N2b  C8b  .  .  1.450(18)
  N3b  C11b  .  .  1.335(16)
  N3b  C12b  .  .  1.389(16)
  N4b  C11b  .  .  1.340(15)
  N4b  C17b  .  .  1.402(18)
  N4b  C18b  .  .  1.466(18)
  C1b  C9b  .  .  1.485(17)
  C2b  C3b  .  .  1.411(19)
  C2b  C7b  .  .  1.411(18)
  C3b  C4b  .  .  1.35(3)
  C4b  C5b  .  .  1.41(3)
  C5b  C6b  .  .  1.39(3)
  C6b  C7b  .  .  1.40(2)
  C9b  C10b  .  .  1.589(17)
  C10b  C11b  .  .  1.488(17)
  C12b  C13b  .  .  1.392(19)
  C12b  C17b  .  .  1.365(17)
  C13b  C14b  .  .  1.394(18)
  C14b  C15b  .  .  1.378(19)
  C15b  C16b  .  .  1.38(3)
  C16b  C17b  .  .  1.41(2)
  O1c  C9c  .  .  1.403(13)
  O2c  C10c  .  .  1.36(3)
  N1c  C1c  .  .  1.353(16)
  N1c  C2c  .  .  1.418(16)
  N2c  C1c  .  .  1.364(16)
  N2c  C7c  .  .  1.393(19)
  N2c  C8c  .  .  1.47(2)
  N3c  C11c  .  .  1.350(15)
  N3c  C12c  .  .  1.387(17)
  N4c  C11c  .  .  1.361(18)
  N4c  C17c  .  .  1.377(18)
  N4c  C18c  .  .  1.474(19)
  C1c  C9c  .  .  1.519(18)
  C2c  C3c  .  .  1.39(2)
  C2c  C7c  .  .  1.403(18)
  C3c  C4c  .  .  1.37(3)
  C4c  C5c  .  .  1.38(3)
  C5c  C6c  .  .  1.38(3)
  C6c  C7c  .  .  1.39(3)
  C9c  C10c  .  .  1.50(2)
  C10c  C11c  .  .  1.49(3)
  C12c  C13c  .  .  1.408(18)
  C12c  C17c  .  .  1.399(19)
  C13c  C14c  .  .  1.36(3)
  C14c  C15c  .  .  1.39(3)
  C15c  C16c  .  .  1.36(3)
  C16c  C17c  .  .  1.38(3)
  Cl1f  O1f  .  .  1.50(3)
  Cl1f  O2f  .  .  1.39(2)
  Cl1f  O3f  .  .  1.56(3)
  Cl1f  O4f  .  .  1.37(3)
  Cl1g  O1g  .  .  1.432(10)
  Cl1g  O2g  .  .  1.453(9)
  Cl1g  O3g  .  .  1.434(11)
  Cl1g  O4g  .  .  1.439(10)
  O1h  C1h  .  .  1.43(4)
  O1h  C1h'  .  .  1.37(6)
  C1h  C2h  .  .  1.44(6)
  C1h'  C2h  .  .  1.42(7)
 
 
loop_
_geom_angle_atom_site_label_1
_geom_angle_atom_site_label_2
_geom_angle_atom_site_label_3
_geom_angle_site_symmetry_1
_geom_angle_site_symmetry_2
_geom_angle_site_symmetry_3
_geom_angle
  Cu2  Cu1  Cu3  .  .  .  124.06(6)
  Cu2  Cu1  Cu4  .  .  .  72.88(5)
  Cu2  Cu1  O1a  .  .  .  37.3(3)
  Cu2  Cu1  N3a  .  .  .  125.5(3)
  Cu2  Cu1  O1b  .  .  .  39.1(3)
  Cu2  Cu1  N3b  .  .  .  124.6(3)
  Cu2  Cu1  O2g  .  .  .  78.9(2)
  Cu3  Cu1  Cu4  .  .  .  52.53(5)
  Cu3  Cu1  O1a  .  .  .  123.4(3)
  Cu3  Cu1  N3a  .  .  .  93.0(3)
  Cu3  Cu1  O1b  .  .  .  94.8(3)
  Cu3  Cu1  N3b  .  .  .  65.9(3)
  Cu3  Cu1  O2g  .  .  .  148.8(2)
  Cu4  Cu1  O1a  .  .  .  76.2(3)
  Cu4  Cu1  N3a  .  .  .  117.2(3)
  Cu4  Cu1  O1b  .  .  .  58.1(3)
  Cu4  Cu1  N3b  .  .  .  103.4(3)
  Cu4  Cu1  O2g  .  .  .  149.8(2)
  O1a  Cu1  N3a  .  .  .  90.3(4)
  O1a  Cu1  O1b  .  .  .  73.2(4)
  O1a  Cu1  N3b  .  .  .  161.6(4)
  O1a  Cu1  O2g  .  .  .  87.8(3)
  N3a  Cu1  O1b  .  .  .  163.4(4)
  N3a  Cu1  N3b  .  .  .  105.8(4)
  N3a  Cu1  O2g  .  .  .  87.8(4)
  O1b  Cu1  N3b  .  .  .  90.8(4)
  O1b  Cu1  O2g  .  .  .  93.0(3)
  N3b  Cu1  O2g  .  .  .  83.8(4)
  Cu1  Cu2  O1a  .  .  .  36.6(3)
  Cu1  Cu2  N1a  .  .  .  116.0(3)
  Cu1  Cu2  O1b  .  .  .  39.8(3)
  Cu1  Cu2  Cl1d  .  .  .  139.81(12)
  Cu1  Cu2  O1g  .  .  .  84.0(2)
  O1a  Cu2  N1a  .  .  .  81.4(4)
  O1a  Cu2  O1b  .  .  .  73.3(4)
  O1a  Cu2  Cl1d  .  .  .  169.7(3)
  O1a  Cu2  O1g  .  .  .  98.3(3)
  N1a  Cu2  O1b  .  .  .  154.7(4)
  N1a  Cu2  Cl1d  .  .  .  104.1(3)
  N1a  Cu2  O1g  .  .  .  94.4(4)
  O1b  Cu2  Cl1d  .  .  .  100.8(3)
  O1b  Cu2  O1g  .  .  .  90.2(3)
  Cl1d  Cu2  O1g  .  .  .  90.1(2)
  Cu1  Cu3  Cu4  .  .  .  58.46(5)
  Cu1  Cu3  O2b  .  .  .  60.1(3)
  Cu1  Cu3  O1c  .  .  .  53.5(3)
  Cu1  Cu3  N1c  .  .  .  112.3(3)
  Cu1  Cu3  Cl1e  .  .  .  117.70(10)
  Cu4  Cu3  O2b  .  .  .  40.9(3)
  Cu4  Cu3  O1c  .  .  .  38.8(3)
  Cu4  Cu3  N1c  .  .  .  117.0(3)
  Cu4  Cu3  Cl1e  .  .  .  138.36(11)
  O2b  Cu3  O1c  .  .  .  76.2(4)
  O2b  Cu3  N1c  .  .  .  157.9(4)
  O2b  Cu3  Cl1e  .  .  .  98.7(3)
  O1c  Cu3  N1c  .  .  .  82.9(4)
  O1c  Cu3  Cl1e  .  .  .  171.1(3)
  N1c  Cu3  Cl1e  .  .  .  102.9(4)
  Cu1  Cu4  Cu3  .  .  .  69.00(5)
  Cu1  Cu4  O2b  .  .  .  67.3(3)
  Cu1  Cu4  N1b  .  .  .  109.2(3)
  Cu1  Cu4  O1c  .  .  .  61.0(3)
  Cu1  Cu4  N3c  .  .  .  105.1(3)
  Cu1  Cu4  O1w  .  .  .  141.4(4)
  Cu3  Cu4  O2b  .  .  .  39.5(3)
  Cu3  Cu4  N1b  .  .  .  127.7(3)
  Cu3  Cu4  O1c  .  .  .  39.9(3)
  Cu3  Cu4  N3c  .  .  .  127.5(3)
  Cu3  Cu4  O1w  .  .  .  72.5(4)
  O2b  Cu4  N1b  .  .  .  89.9(4)
  O2b  Cu4  O1c  .  .  .  75.8(4)
  O2b  Cu4  N3c  .  .  .  165.9(4)
  O2b  Cu4  O1w  .  .  .  85.4(4)
  N1b  Cu4  O1c  .  .  .  164.9(4)
  N1b  Cu4  N3c  .  .  .  104.0(4)
  N1b  Cu4  O1w  .  .  .  97.0(5)
  O1c  Cu4  N3c  .  .  .  90.1(4)
  O1c  Cu4  O1w  .  .  .  86.9(5)
  N3c  Cu4  O1w  .  .  .  95.1(5)
  Cu1  O1a  Cu2  .  .  .  106.1(4)
  Cu1  O1a  C9a  .  .  .  132.2(7)
  Cu2  O1a  C9a  .  .  .  119.3(7)
  Cu2  N1a  C1a  .  .  .  113.7(8)
  Cu2  N1a  C2a  .  .  .  139.1(8)
  C1a  N1a  C2a  .  .  .  104.9(10)
  C1a  N2a  C7a  .  .  .  107.3(9)
  C1a  N2a  C8a  .  .  .  127.5(10)
  C7a  N2a  C8a  .  .  .  124.8(10)
  Cu1  N3a  C11a  .  .  .  124.5(8)
  Cu1  N3a  C12a  .  .  .  130.6(8)
  C11a  N3a  C12a  .  .  .  104.9(9)
  C11a  N4a  C17a  .  .  .  108.2(10)
  C11a  N4a  C18a  .  .  .  128.6(11)
  C17a  N4a  C18a  .  .  .  122.7(10)
  N1a  C1a  N2a  .  .  .  113.5(10)
  N1a  C1a  C9a  .  .  .  118.1(10)
  N2a  C1a  C9a  .  .  .  128.3(10)
  N1a  C2a  C3a  .  .  .  130.9(12)
  N1a  C2a  C7a  .  .  .  109.4(10)
  C3a  C2a  C7a  .  .  .  119.6(12)
  C2a  C3a  C4a  .  .  .  116.6(12)
  C3a  C4a  C5a  .  .  .  121.7(14)
  C4a  C5a  C6a  .  .  .  122.4(14)
  C5a  C6a  C7a  .  .  .  116.3(12)
  N2a  C7a  C2a  .  .  .  104.9(11)
  N2a  C7a  C6a  .  .  .  131.7(11)
  C2a  C7a  C6a  .  .  .  123.3(12)
  O1a  C9a  C1a  .  .  .  106.6(9)
  O1a  C9a  C10a  .  .  .  111.2(9)
  C1a  C9a  C10a  .  .  .  113.5(10)
  O2a  C10a  C9a  .  .  .  110.0(9)
  O2a  C10a  C11a  .  .  .  110.2(9)
  C9a  C10a  C11a  .  .  .  110.5(10)
  N3a  C11a  N4a  .  .  .  112.2(11)
  N3a  C11a  C10a  .  .  .  125.4(10)
  N4a  C11a  C10a  .  .  .  122.4(11)
  N3a  C12a  C13a  .  .  .  130.6(11)
  N3a  C12a  C17a  .  .  .  109.1(11)
  C13a  C12a  C17a  .  .  .  120.4(12)
  C12a  C13a  C14a  .  .  .  117.2(12)
  C13a  C14a  C15a  .  .  .  120.0(13)
  C14a  C15a  C16a  .  .  .  123.1(14)
  C15a  C16a  C17a  .  .  .  116.7(13)
  N4a  C17a  C12a  .  .  .  105.6(10)
  N4a  C17a  C16a  .  .  .  131.9(12)
  C12a  C17a  C16a  .  .  .  122.4(13)
  Cu1  O1b  Cu2  .  .  .  101.2(4)
  Cu1  O1b  C9b  .  .  .  128.9(7)
  Cu2  O1b  C9b  .  .  .  129.9(7)
  Cu3  O2b  Cu4  .  .  .  99.7(4)
  Cu3  O2b  C10b  .  .  .  129.1(8)
  Cu4  O2b  C10b  .  .  .  124.0(7)
  Cu4  N1b  C1b  .  .  .  116.6(8)
  Cu4  N1b  C2b  .  .  .  135.8(8)
  C1b  N1b  C2b  .  .  .  105.1(10)
  C1b  N2b  C7b  .  .  .  107.4(11)
  C1b  N2b  C8b  .  .  .  125.1(12)
  C7b  N2b  C8b  .  .  .  127.2(12)
  Cu1  N3b  C11b  .  .  .  119.0(8)
  Cu1  N3b  C12b  .  .  .  132.7(9)
  C11b  N3b  C12b  .  .  .  106.4(10)
  C11b  N4b  C17b  .  .  .  107.1(10)
  C11b  N4b  C18b  .  .  .  126.9(11)
  C17b  N4b  C18b  .  .  .  125.9(10)
  N1b  C1b  N2b  .  .  .  112.0(11)
  N1b  C1b  C9b  .  .  .  119.8(10)
  N2b  C1b  C9b  .  .  .  128.2(11)
  N1b  C2b  C3b  .  .  .  131.3(12)
  N1b  C2b  C7b  .  .  .  108.6(11)
  C3b  C2b  C7b  .  .  .  120.0(12)
  C2b  C3b  C4b  .  .  .  117.9(13)
  C3b  C4b  C5b  .  .  .  121.8(14)
  C4b  C5b  C6b  .  .  .  122.5(14)
  C5b  C6b  C7b  .  .  .  115.5(13)
  N2b  C7b  C2b  .  .  .  106.8(12)
  N2b  C7b  C6b  .  .  .  131.0(13)
  C2b  C7b  C6b  .  .  .  122.1(13)
  O1b  C9b  C1b  .  .  .  111.2(10)
  O1b  C9b  C10b  .  .  .  107.5(9)
  C1b  C9b  C10b  .  .  .  105.9(10)
  O2b  C10b  C9b  .  .  .  108.1(9)
  O2b  C10b  C11b  .  .  .  110.9(9)
  C9b  C10b  C11b  .  .  .  108.2(9)
  N3b  C11b  N4b  .  .  .  111.3(11)
  N3b  C11b  C10b  .  .  .  123.1(10)
  N4b  C11b  C10b  .  .  .  125.6(11)
  N3b  C12b  C13b  .  .  .  131.0(11)
  N3b  C12b  C17b  .  .  .  108.8(12)
  C13b  C12b  C17b  .  .  .  120.2(12)
  C12b  C13b  C14b  .  .  .  116.5(12)
  C13b  C14b  C15b  .  .  .  123.2(13)
  C14b  C15b  C16b  .  .  .  120.3(13)
  C15b  C16b  C17b  .  .  .  116.3(13)
  N4b  C17b  C12b  .  .  .  106.4(11)
  N4b  C17b  C16b  .  .  .  130.2(12)
  C12b  C17b  C16b  .  .  .  123.3(13)
  Cu3  O1c  Cu4  .  .  .  101.3(4)
  Cu3  O1c  C9c  .  .  .  118.4(8)
  Cu4  O1c  C9c  .  .  .  130.1(8)
  Cu3  N1c  C1c  .  .  .  113.1(8)
  Cu3  N1c  C2c  .  .  .  140.4(8)
  C1c  N1c  C2c  .  .  .  105.6(10)
  C1c  N2c  C7c  .  .  .  107.8(11)
  C1c  N2c  C8c  .  .  .  126.7(13)
  C7c  N2c  C8c  .  .  .  125.3(12)
  Cu4  N3c  C11c  .  .  .  122.5(9)
  Cu4  N3c  C12c  .  .  .  131.2(8)
  C11c  N3c  C12c  .  .  .  105.3(10)
  C11c  N4c  C17c  .  .  .  108.0(11)
  C11c  N4c  C18c  .  .  .  128.2(13)
  C17c  N4c  C18c  .  .  .  123.6(13)
  N1c  C1c  N2c  .  .  .  111.7(11)
  N1c  C1c  C9c  .  .  .  119.9(10)
  N2c  C1c  C9c  .  .  .  128.3(11)
  N1c  C2c  C3c  .  .  .  130.7(11)
  N1c  C2c  C7c  .  .  .  108.5(11)
  C3c  C2c  C7c  .  .  .  120.4(12)
  C2c  C3c  C4c  .  .  .  117.0(13)
  C3c  C4c  C5c  .  .  .  122.3(16)
  C4c  C5c  C6c  .  .  .  122.3(17)
  C5c  C6c  C7c  .  .  .  115.6(14)
  N2c  C7c  C2c  .  .  .  106.4(11)
  N2c  C7c  C6c  .  .  .  131.1(13)
  C2c  C7c  C6c  .  .  .  122.3(14)
  O1c  C9c  C1c  .  .  .  105.4(10)
  O1c  C9c  C10c  .  .  .  115.0(11)
  C1c  C9c  C10c  .  .  .  113.7(10)
  O2c  C10c  C9c  .  .  .  112.7(14)
  O2c  C10c  C11c  .  .  .  112.4(14)
  C9c  C10c  C11c  .  .  .  110.2(11)
  N3c  C11c  N4c  .  .  .  111.3(11)
  N3c  C11c  C10c  .  .  .  125.2(12)
  N4c  C11c  C10c  .  .  .  123.5(11)
  N3c  C12c  C13c  .  .  .  131.8(12)
  N3c  C12c  C17c  .  .  .  109.7(11)
  C13c  C12c  C17c  .  .  .  118.6(13)
  C12c  C13c  C14c  .  .  .  116.9(13)
  C13c  C14c  C15c  .  .  .  123.5(15)
  C14c  C15c  C16c  .  .  .  120.7(15)
  C15c  C16c  C17c  .  .  .  116.6(15)
  N4c  C17c  C12c  .  .  .  105.7(13)
  N4c  C17c  C16c  .  .  .  130.5(13)
  C12c  C17c  C16c  .  .  .  123.6(13)
  O1f  Cl1f  O2f  .  .  .  112.3(13)
  O1f  Cl1f  O3f  .  .  .  106.5(13)
  O1f  Cl1f  O4f  .  .  .  116.3(14)
  O2f  Cl1f  O3f  .  .  .  104.3(14)
  O2f  Cl1f  O4f  .  .  .  108.4(13)
  O3f  Cl1f  O4f  .  .  .  108.2(14)
  O1g  Cl1g  O2g  .  .  .  109.1(5)
  O1g  Cl1g  O3g  .  .  .  110.5(6)
  O1g  Cl1g  O4g  .  .  .  109.5(6)
  O2g  Cl1g  O3g  .  .  .  109.1(6)
  O2g  Cl1g  O4g  .  .  .  108.3(6)
  O3g  Cl1g  O4g  .  .  .  110.3(6)
  Cu2  O1g  Cl1g  .  .  .  123.5(5)
  Cu1  O2g  Cl1g  .  .  .  119.3(5)
  O1h  C1h  C2h  .  .  .  106(3)
  O1h  C1h'  C2h  .  .  .  110(4)
 
 
loop_
_geom_torsion_atom_site_label_1
_geom_torsion_atom_site_label_2
_geom_torsion_atom_site_label_3
_geom_torsion_atom_site_label_4
_geom_torsion_site_symmetry_1
_geom_torsion_site_symmetry_2
_geom_torsion_site_symmetry_3
_geom_torsion_site_symmetry_4
_geom_torsion
  C2a  N1a  C1a  N2a  .  .  .  .  .0(13)
  C2a  N1a  C1a  C9a  .  .  .  .  177.2(10)
  C1a  N1a  C2a  C3a  .  .  .  .  178.4(14)
  C1a  N1a  C2a  C7a  .  .  .  .  .3(13)
  C7a  N2a  C1a  N1a  .  .  .  .  -.3(14)
  C7a  N2a  C1a  C9a  .  .  .  .  -177.2(11)
  C8a  N2a  C1a  N1a  .  .  .  .  172.1(11)
  C8a  N2a  C1a  C9a  .  .  .  .  -5(2)
  C1a  N2a  C7a  C2a  .  .  .  .  .5(13)
  C1a  N2a  C7a  C6a  .  .  .  .  177.1(14)
  C8a  N2a  C7a  C2a  .  .  .  .  -172.2(11)
  C8a  N2a  C7a  C6a  .  .  .  .  4(3)
  C12a  N3a  C11a  N4a  .  .  .  .  .5(12)
  C12a  N3a  C11a  C10a  .  .  .  .  -178.8(10)
  C11a  N3a  C12a  C13a  .  .  .  .  -179.4(12)
  C11a  N3a  C12a  C17a  .  .  .  .  -.1(12)
  C17a  N4a  C11a  N3a  .  .  .  .  -.7(12)
  C17a  N4a  C11a  C10a  .  .  .  .  178.6(10)
  C18a  N4a  C11a  N3a  .  .  .  .  171.1(10)
  C18a  N4a  C11a  C10a  .  .  .  .  -9.6(17)
  C11a  N4a  C17a  C12a  .  .  .  .  .6(12)
  C11a  N4a  C17a  C16a  .  .  .  .  -178.7(12)
  C18a  N4a  C17a  C12a  .  .  .  .  -171.8(10)
  C18a  N4a  C17a  C16a  .  .  .  .  8.9(18)
  N1a  C1a  C9a  O1a  .  .  .  .  -8.1(14)
  N1a  C1a  C9a  C10a  .  .  .  .  114.6(11)
  N2a  C1a  C9a  O1a  .  .  .  .  168.6(11)
  N2a  C1a  C9a  C10a  .  .  .  .  -68.7(14)
  N1a  C2a  C3a  C4a  .  .  .  .  178.8(13)
  C7a  C2a  C3a  C4a  .  .  .  .  -3.2(19)
  N1a  C2a  C7a  N2a  .  .  .  .  -.5(13)
  N1a  C2a  C7a  C6a  .  .  .  .  -177.4(12)
  C3a  C2a  C7a  N2a  .  .  .  .  -178.9(12)
  C3a  C2a  C7a  C6a  .  .  .  .  4.2(19)
  C2a  C3a  C4a  C5a  .  .  .  .  0(3)
  C3a  C4a  C5a  C6a  .  .  .  .  1(3)
  C4a  C5a  C6a  C7a  .  .  .  .  0(3)
  C5a  C6a  C7a  N2a  .  .  .  .  -178.1(13)
  C5a  C6a  C7a  C2a  .  .  .  .  -2(2)
  O1a  C9a  C10a  O2a  .  .  .  .  64.4(12)
  O1a  C9a  C10a  C11a  .  .  .  .  -57.5(11)
  C1a  C9a  C10a  O2a  .  .  .  .  -55.7(12)
  C1a  C9a  C10a  C11a  .  .  .  .  -177.7(8)
  O2a  C10a  C11a  N3a  .  .  .  .  -80.7(14)
  O2a  C10a  C11a  N4a  .  .  .  .  100.1(12)
  C9a  C10a  C11a  N3a  .  .  .  .  41.1(13)
  C9a  C10a  C11a  N4a  .  .  .  .  -138.1(10)
  N3a  C12a  C13a  C14a  .  .  .  .  -179.4(11)
  C17a  C12a  C13a  C14a  .  .  .  .  1.3(17)
  N3a  C12a  C17a  N4a  .  .  .  .  -.3(12)
  N3a  C12a  C17a  C16a  .  .  .  .  179.1(10)
  C13a  C12a  C17a  N4a  .  .  .  .  179.1(10)
  C13a  C12a  C17a  C16a  .  .  .  .  -1.5(17)
  C12a  C13a  C14a  C15a  .  .  .  .  1.7(18)
  C13a  C14a  C15a  C16a  .  .  .  .  -5(3)
  C14a  C15a  C16a  C17a  .  .  .  .  5(2)
  C15a  C16a  C17a  N4a  .  .  .  .  177.7(12)
  C15a  C16a  C17a  C12a  .  .  .  .  -1.6(18)
  C2b  N1b  C1b  N2b  .  .  .  .  -1.2(14)
  C2b  N1b  C1b  C9b  .  .  .  .  -179.5(11)
  C1b  N1b  C2b  C3b  .  .  .  .  178.2(14)
  C1b  N1b  C2b  C7b  .  .  .  .  .9(14)
  C7b  N2b  C1b  N1b  .  .  .  .  1.0(15)
  C7b  N2b  C1b  C9b  .  .  .  .  179.2(13)
  C8b  N2b  C1b  N1b  .  .  .  .  176.5(14)
  C8b  N2b  C1b  C9b  .  .  .  .  -5(3)
  C1b  N2b  C7b  C2b  .  .  .  .  -.4(15)
  C1b  N2b  C7b  C6b  .  .  .  .  176.5(16)
  C8b  N2b  C7b  C2b  .  .  .  .  -175.7(14)
  C8b  N2b  C7b  C6b  .  .  .  .  1(3)
  C12b  N3b  C11b  N4b  .  .  .  .  -.2(13)
  C12b  N3b  C11b  C10b  .  .  .  .  -179.6(10)
  C11b  N3b  C12b  C13b  .  .  .  .  178.7(13)
  C11b  N3b  C12b  C17b  .  .  .  .  .2(13)
  C17b  N4b  C11b  N3b  .  .  .  .  .1(13)
  C17b  N4b  C11b  C10b  .  .  .  .  179.5(11)
  C18b  N4b  C11b  N3b  .  .  .  .  175.8(11)
  C18b  N4b  C11b  C10b  .  .  .  .  -4.7(18)
  C11b  N4b  C17b  C12b  .  .  .  .  .1(13)
  C11b  N4b  C17b  C16b  .  .  .  .  176.8(12)
  C18b  N4b  C17b  C12b  .  .  .  .  -175.8(11)
  C18b  N4b  C17b  C16b  .  .  .  .  1.0(19)
  N1b  C1b  C9b  O1b  .  .  .  .  -41.9(15)
  N1b  C1b  C9b  C10b  .  .  .  .  74.6(14)
  N2b  C1b  C9b  O1b  .  .  .  .  140.0(13)
  N2b  C1b  C9b  C10b  .  .  .  .  -103.5(14)
  N1b  C2b  C3b  C4b  .  .  .  .  179.0(14)
  C7b  C2b  C3b  C4b  .  .  .  .  -4(3)
  N1b  C2b  C7b  N2b  .  .  .  .  -.4(15)
  N1b  C2b  C7b  C6b  .  .  .  .  -177.6(13)
  C3b  C2b  C7b  N2b  .  .  .  .  -178.0(12)
  C3b  C2b  C7b  C6b  .  .  .  .  5(3)
  C2b  C3b  C4b  C5b  .  .  .  .  3(3)
  C3b  C4b  C5b  C6b  .  .  .  .  -2(3)
  C4b  C5b  C6b  C7b  .  .  .  .  2(3)
  C5b  C6b  C7b  N2b  .  .  .  .  179.8(15)
  C5b  C6b  C7b  C2b  .  .  .  .  -4(3)
  O1b  C9b  C10b  O2b  .  .  .  .  57.1(11)
  O1b  C9b  C10b  C11b  .  .  .  .  -63.1(11)
  C1b  C9b  C10b  O2b  .  .  .  .  -61.9(12)
  C1b  C9b  C10b  C11b  .  .  .  .  177.9(9)
  O2b  C10b  C11b  N3b  .  .  .  .  -50.7(15)
  O2b  C10b  C11b  N4b  .  .  .  .  129.9(12)
  C9b  C10b  C11b  N3b  .  .  .  .  67.7(13)
  C9b  C10b  C11b  N4b  .  .  .  .  -111.7(12)
  N3b  C12b  C13b  C14b  .  .  .  .  179.7(12)
  C17b  C12b  C13b  C14b  .  .  .  .  -1.9(17)
  N3b  C12b  C17b  N4b  .  .  .  .  -.2(13)
  N3b  C12b  C17b  C16b  .  .  .  .  -177.2(11)
  C13b  C12b  C17b  N4b  .  .  .  .  -178.9(11)
  C13b  C12b  C17b  C16b  .  .  .  .  4.1(18)
  C12b  C13b  C14b  C15b  .  .  .  .  -.6(19)
  C13b  C14b  C15b  C16b  .  .  .  .  1(2)
  C14b  C15b  C16b  C17b  .  .  .  .  1.0(19)
  C15b  C16b  C17b  N4b  .  .  .  .  -179.8(12)
  C15b  C16b  C17b  C12b  .  .  .  .  -3.6(18)
  C2c  N1c  C1c  N2c  .  .  .  .  .3(14)
  C2c  N1c  C1c  C9c  .  .  .  .  175.7(11)
  C1c  N1c  C2c  C3c  .  .  .  .  -173.5(14)
  C1c  N1c  C2c  C7c  .  .  .  .  -.3(14)
  C7c  N2c  C1c  N1c  .  .  .  .  -.3(15)
  C7c  N2c  C1c  C9c  .  .  .  .  -175.2(12)
  C8c  N2c  C1c  N1c  .  .  .  .  175.1(13)
  C8c  N2c  C1c  C9c  .  .  .  .  0(3)
  C1c  N2c  C7c  C2c  .  .  .  .  .1(15)
  C1c  N2c  C7c  C6c  .  .  .  .  175.4(16)
  C8c  N2c  C7c  C2c  .  .  .  .  -175.4(13)
  C8c  N2c  C7c  C6c  .  .  .  .  0(3)
  C12c  N3c  C11c  N4c  .  .  .  .  1.0(14)
  C12c  N3c  C11c  C10c  .  .  .  .  -176.9(13)
  C11c  N3c  C12c  C13c  .  .  .  .  178.3(14)
  C11c  N3c  C12c  C17c  .  .  .  .  -1.1(14)
  C17c  N4c  C11c  N3c  .  .  .  .  -.6(15)
  C17c  N4c  C11c  C10c  .  .  .  .  177.4(13)
  C18c  N4c  C11c  N3c  .  .  .  .  175.8(13)
  C18c  N4c  C11c  C10c  .  .  .  .  -6(3)
  C11c  N4c  C17c  C12c  .  .  .  .  -.1(15)
  C11c  N4c  C17c  C16c  .  .  .  .  -173.9(15)
  C18c  N4c  C17c  C12c  .  .  .  .  -176.7(13)
  C18c  N4c  C17c  C16c  .  .  .  .  10(3)
  N1c  C1c  C9c  O1c  .  .  .  .  -6.3(15)
  N1c  C1c  C9c  C10c  .  .  .  .  120.5(13)
  N2c  C1c  C9c  O1c  .  .  .  .  168.2(12)
  N2c  C1c  C9c  C10c  .  .  .  .  -65.0(18)
  N1c  C2c  C3c  C4c  .  .  .  .  174.8(14)
  C7c  C2c  C3c  C4c  .  .  .  .  2(2)
  N1c  C2c  C7c  N2c  .  .  .  .  .1(15)
  N1c  C2c  C7c  C6c  .  .  .  .  -175.7(14)
  C3c  C2c  C7c  N2c  .  .  .  .  174.2(12)
  C3c  C2c  C7c  C6c  .  .  .  .  -2(3)
  C2c  C3c  C4c  C5c  .  .  .  .  -3(3)
  C3c  C4c  C5c  C6c  .  .  .  .  2(3)
  C4c  C5c  C6c  C7c  .  .  .  .  -1(3)
  C5c  C6c  C7c  N2c  .  .  .  .  -173.7(15)
  C5c  C6c  C7c  C2c  .  .  .  .  1(3)
  O1c  C9c  C10c  O2c  .  .  .  .  72.6(15)
  O1c  C9c  C10c  C11c  .  .  .  .  -53.8(17)
  C1c  C9c  C10c  O2c  .  .  .  .  -49.0(16)
  C1c  C9c  C10c  C11c  .  .  .  .  -175.5(12)
  O2c  C10c  C11c  N3c  .  .  .  .  -75.5(16)
  O2c  C10c  C11c  N4c  .  .  .  .  106.8(15)
  C9c  C10c  C11c  N3c  .  .  .  .  51.1(19)
  C9c  C10c  C11c  N4c  .  .  .  .  -126.6(14)
  N3c  C12c  C13c  C14c  .  .  .  .  -176.8(14)
  C17c  C12c  C13c  C14c  .  .  .  .  3(2)
  N3c  C12c  C17c  N4c  .  .  .  .  .8(15)
  N3c  C12c  C17c  C16c  .  .  .  .  175.1(13)
  C13c  C12c  C17c  N4c  .  .  .  .  -178.7(12)
  C13c  C12c  C17c  C16c  .  .  .  .  -4(3)
  C12c  C13c  C14c  C15c  .  .  .  .  0(3)
  C13c  C14c  C15c  C16c  .  .  .  .  0(3)
  C14c  C15c  C16c  C17c  .  .  .  .  -2(3)
  C15c  C16c  C17c  N4c  .  .  .  .  177.1(15)
  C15c  C16c  C17c  C12c  .  .  .  .  4(3)

#==END====================================================

data_leka
 
#-- [Cu4(C16H13.6N4O2)5] (ClO4)6 (C2H6O)3.5 (H2O)1.5 -----------------------
 
_audit_creation_date               '2001-09-25'
_audit_creation_method             from_xtal_archive_file_using_CIFIO
_audit_update_record               '2004-07-08'
_audit_conform_dict_name           'cif_core.dic'
_audit_conform_dict_version        '2.0.1'
 
#--------------------------------------------------------------------------- 

_publ_requested_journal            'Inorg. Chem.'
 
 
_publ_contact_author                                                   

;
     Alan F. Williams'
     Department of Inorganic, Analytical and  Applied Chemistry
     University of Geneva
     30, quai E. Ansermet
     CH - 1211 Geneva 4
     Switzerland
;

_publ_contact_author_email          Alan.Williams@chiam.unige.ch
_publ_contact_author_phone          '41 22 379 64 25'
_publ_contact_author_fax            '41 22 379 68 30'
 
 
  
loop_
_publ_author_name
_publ_author_address
 
   ' Katharina Isele'
;    Department of Inorganic, Analytical and  Applied Chemistry
     University of Geneva
     30, quai E. Ansermet
     CH - 1211 Geneva 4
     Switzerland
;

   ' Patrick Franz'
;    Department of Chemistry
     Universitat Bern
     Freistrasse 9
     CH - 3009 Bern
     Switzerland
;

   ' Gerald Bernardinelli'
;    Laboratoiry of X-ray Crystallography
     University de Geneva
     24, quai E. Ansermet
     CH - 1211 Geneva 4
     Switzerland
;

   ' Silvio Decurtins'
;    Department of Chemistry
     Universitat Bern
     Freistrasse 9
     CH - 3009 Bern
     Switzerland
;

   ' Alan F. Williams'
;    Department of Inorganic, Analytical and  Applied Chemistry
     University of Geneva
     30, quai E. Ansermet
     CH - 1211 Geneva 4
     Switzerland
;


_publ_section_title
;
Self-assembly and Interconversion of Tetranuclear Copper(II) Complexes
;

 
_chemical_formula_moiety           
'Cu4 (C16 H13.6 N4 O2)5 ; (Cl O4)6 ; (C2 H6 O)3.5 ; (H2 O)1.5'

_chemical_formula_sum              'C87 H92 Cl6 Cu4 N20 O39'
_chemical_formula_weight           2508.9
 
_symmetry_cell_setting             triclinic
_symmetry_space_group_name_H-M     'P -1'
_symmetry_space_group_name_Hall    '-P 1'

loop_
_symmetry_equiv_pos_as_xyz
  +x,+y,+z  -x,-y,-z
_cell_length_a                     17.2589(12)
_cell_length_b                     18.3400(11)
_cell_length_c                     20.7116(12)
_cell_angle_alpha                  110.350(7)
_cell_angle_beta                   101.109(7)
_cell_angle_gamma                  111.292(7)
_cell_volume                       5331.7(9)
_cell_formula_units_Z              2
_exptl_crystal_density_diffrn        1.563
_exptl_crystal_density_meas        not_measured
_diffrn_radiation_type             'MoK\a'
_diffrn_radiation_wavelength       .71073
_cell_measurement_reflns_used      7998
_cell_measurement_theta_min        3.9
_cell_measurement_theta_max        26.0
_cell_measurement_temperature      200
_exptl_absorpt_coefficient_mu      1.03
_exptl_crystal_F_000               2568
_exptl_crystal_description         plate
_exptl_crystal_size_max            .26
_exptl_crystal_size_mid            .24
_exptl_crystal_size_min            .08
_exptl_crystal_colour              blue
 
 
_diffrn_measurement_device_type    'Stoe Ipds'
_diffrn_measurement_method         \f
_diffrn_detector_area_resol_mean   6
_exptl_absorpt_correction_type     numerical
_exptl_absorpt_process_details     'XRED; Stoe & Cie, 1999'
_exptl_absorpt_correction_T_min    .7894
_exptl_absorpt_correction_T_max    .9181
_diffrn_reflns_number              46988
_reflns_number_total               19558
_reflns_number_gt                  8587
_reflns_threshold_expression       'refl observed if Fo > 3.99 \s(Fo)'
_diffrn_reflns_theta_max             26.0
_diffrn_measured_fraction_theta_max  0.93
_diffrn_reflns_theta_full            26.0
_diffrn_measured_fraction_theta_full 0.93
_diffrn_reflns_av_R_equivalents       .069
_diffrn_reflns_limit_h_min         -21
_diffrn_reflns_limit_h_max         21
_diffrn_reflns_limit_k_min         -22
_diffrn_reflns_limit_k_max         22
_diffrn_reflns_limit_l_min         -25
_diffrn_reflns_limit_l_max         25
_diffrn_standards_decay_%          0
 
_refine_ls_structure_factor_coef   F
_refine_ls_R_factor_gt                .059
_refine_ls_wR_factor_ref              .058
_refine_ls_goodness_of_fit_ref       1.239
_refine_ls_number_reflns           9002
_refine_ls_number_parameters       1424
_refine_ls_weighting_scheme        calc
_refine_ls_weighting_details       '\w=1/[\s^2^(Fo)+0.00015(Fo^2^)]'
_refine_ls_hydrogen_treatment      noref
_refine_ls_shift/su_max               .018
_refine_diff_density_max             1.642
_refine_diff_density_min             -1.61
_refine_ls_extinction_method       none
_refine_ls_extinction_coef         .00000
_refine_ls_abs_structure_details   none

_refine_special_details
;
Disorders:
   The nitrate h is disordered on two positions (with the N atom in common)
   which have been refined with population parameters of 0.70 and 0.30.

Hydrogen treatment:
   Hydrogen atoms of water molecules, EtOH and -OH groups of the ligands
   have not been observed nor calculated.

   Other hydrogen atomic coordinates have been calculated.
;


_computing_data_collection         'EXPOSE (Stoe & Cie, 1999)'
_computing_cell_refinement         'CELL (Stoe & Cie, 1999)'
_computing_data_reduction          'XRED (Stoe & Cie, 1999)'
_computing_structure_solution      'SHELXS-97'
_computing_structure_refinement    xtal_CRYLSQ
_computing_molecular_graphics      xtal_gx3
_computing_publication_material    xtal_CIFIO
 
 
loop_
_atom_type_symbol
_atom_type_scat_source
_atom_type_scat_dispersion_real
_atom_type_scat_dispersion_imag
  C  Int._Tables_Vol_IV_Tables_2.2B_and_2.3.1  .002  .002
  H  Int._Tables_Vol_IV_Tables_2.2B_and_2.3.1  0  0
  N  Int._Tables_Vol_IV_Tables_2.2B_and_2.3.1  .004  .003
  O  Int._Tables_Vol_IV_Tables_2.2B_and_2.3.1  .008  .006
  Cl  Int._Tables_Vol_IV_Tables_2.2B_and_2.3.1  .132  .159
  Cu  Int._Tables_Vol_IV_Tables_2.2B_and_2.3.1  .263   1.266
 
 
loop_
_atom_site_label
_atom_site_fract_x
_atom_site_fract_y
_atom_site_fract_z
_atom_site_U_iso_or_equiv
_atom_site_occupancy
_atom_site_adp_type
  Cu1  .02177(8)  .25420(8)  .12535(6)  .0313(5)  1.00000  Uani
  Cu2  -.07977(7)  .13152(8)  .18310(6)  .0307(5)  1.00000  Uani
  Cu3  .23161(7)  .42160(7)  .45656(6)  .0286(4)  1.00000  Uani
  Cu4  .23311(7)  .25496(7)  .45602(6)  .0291(4)  1.00000  Uani
  O1a  .0266(4)  .2448(4)  .2176(4)  .030(3)  1.00000  Uani
  O2a  .1675(4)  .2928(4)  .3984(3)  .028(3)  1.00000  Uani
  N1a  .1329(5)  .4308(5)  .4038(4)  .031(3)  1.00000  Uani
  N2a  .0130(5)  .3883(5)  .3088(4)  .032(3)  1.00000  Uani
  N3a  -.0716(5)  .1540(5)  .2842(4)  .029(3)  1.00000  Uani
  N4a  -.0009(5)  .2241(5)  .4057(4)  .029(3)  1.00000  Uani
  C1a  .0932(6)  .4863(6)  .4264(6)  .031(4)  1.00000  Uani
  C2a  .1178(7)  .5563(7)  .4953(6)  .037(4)  1.00000  Uani
  C3a  .0671(7)  .5990(7)  .5013(6)  .044(4)  1.00000  Uani
  C4a  -.0067(8)  .5744(7)  .4385(7)  .051(5)  1.00000  Uani
  C5a  -.0309(7)  .5045(7)  .3717(6)  .042(4)  1.00000  Uani
  C6a  .0199(6)  .4615(6)  .3664(6)  .033(4)  1.00000  Uani
  C7a  .0807(6)  .3738(6)  .3333(5)  .026(4)  1.00000  Uani
  C8a  .0941(6)  .2980(6)  .2883(5)  .026(3)  1.00000  Uani
  C9a  .0951(6)  .2424(6)  .3297(5)  .027(4)  1.00000  Uani
  C10a  .0078(6)  .2068(6)  .3402(5)  .025(4)  1.00000  Uani
  C11a  -.1349(6)  .1390(6)  .3179(5)  .031(4)  1.00000  Uani
  C12a  -.2288(7)  .0876(7)  .2870(6)  .038(4)  1.00000  Uani
  C13a  -.2708(6)  .0847(7)  .3361(7)  .041(4)  1.00000  Uani
  C14a  -.2263(7)  .1275(7)  .4126(6)  .040(4)  1.00000  Uani
  C15a  -.1345(7)  .1763(7)  .4425(6)  .035(4)  1.00000  Uani
  C16a  -.0905(6)  .1808(6)  .3943(6)  .032(4)  1.00000  Uani
  O1b  -.0749(4)  .1409(4)  .0945(4)  .035(3)  1.00000  Uani
  O2b  -.2345(5)  .1499(5)  .0831(5)  .052(4)  1.00000  Uani
  N1b  -.0467(5)  .2387(6)  .0297(5)  .037(3)  1.00000  Uani
  N2b  -.1721(6)  .1577(7)  -.0694(5)  .052(4)  1.00000  Uani
  N3b  -.1921(5)  .0211(5)  .1247(5)  .035(3)  1.00000  Uani
  N4b  -.3197(5)  -.0728(6)  .0322(5)  .050(4)  1.00000  Uani
  C1b  -.0473(7)  .2841(7)  -.0128(6)  .038(4)  1.00000  Uani
  C2b  .0147(8)  .3672(8)  .0011(6)  .047(5)  1.00000  Uani
  C3b  -.0063(9)  .3949(8)  -.0512(7)  .058(6)  1.00000  Uani
  C4b  -.0839(10)  .3429(11)  -.1143(8)  .076(7)  1.00000  Uani
  C5b  -.1459(9)  .2607(11)  -.1274(7)  .079(7)  1.00000  Uani
  C6b  -.1263(7)  .2331(8)  -.0753(6)  .050(5)  1.00000  Uani
  C7b  -.1225(7)  .1639(7)  -.0055(6)  .038(4)  1.00000  Uani
  C8b  -.1447(6)  .0994(6)  .0249(5)  .035(4)  1.00000  Uani
  C9b  -.2353(6)  .0728(8)  .0337(6)  .044(4)  1.00000  Uani
  C10b  -.2490(7)  .0078(7)  .0642(6)  .037(4)  1.00000  Uani
  C11b  -.2269(7)  -.0561(7)  .1314(6)  .038(4)  1.00000  Uani
  C12b  -.1956(7)  -.0793(7)  .1842(6)  .043(4)  1.00000  Uani
  C13b  -.2472(8)  -.1617(7)  .1753(7)  .052(5)  1.00000  Uani
  C14b  -.3283(8)  -.2205(7)  .1179(7)  .055(5)  1.00000  Uani
  C15b  -.3613(7)  -.1992(7)  .0649(7)  .054(5)  1.00000  Uani
  C16b  -.3082(7)  -.1169(7)  .0733(6)  .042(4)  1.00000  Uani
  O1c  .3003(4)  .3801(4)  .5034(4)  .031(3)  1.00000  Uani
  O2c  .2771(4)  .4649(4)  .6380(4)  .038(3)  1.00000  Uani
  N1c  .3056(5)  .2693(5)  .5494(5)  .033(3)  1.00000  Uani
  N2c  .4041(5)  .3620(6)  .6639(5)  .036(3)  1.00000  Uani
  N3c  .3144(5)  .5445(5)  .5312(4)  .031(3)  1.00000  Uani
  N4c  .4099(5)  .6528(5)  .6414(5)  .033(3)  1.00000  Uani
  C1c  .3124(6)  .2210(7)  .5863(6)  .031(4)  1.00000  Uani
  C2c  .2690(7)  .1291(6)  .5632(6)  .037(4)  1.00000  Uani
  C3c  .2898(7)  .1024(8)  .6145(7)  .049(5)  1.00000  Uani
  C4c  .3496(8)  .1586(8)  .6874(7)  .051(5)  1.00000  Uani
  C5c  .3935(8)  .2496(8)  .7116(6)  .046(5)  1.00000  Uani
  C6c  .3732(7)  .2774(7)  .6584(6)  .037(4)  1.00000  Uani
  C7c  .3611(6)  .3535(6)  .5979(6)  .031(4)  1.00000  Uani
  C8c  .3692(6)  .4247(7)  .5750(5)  .032(4)  1.00000  Uani
  C9c  .3598(6)  .4988(6)  .6279(5)  .031(4)  1.00000  Uani
  C10c  .3626(6)  .5635(6)  .5998(6)  .031(4)  1.00000  Uani
  C11c  .3325(6)  .6232(6)  .5283(5)  .029(4)  1.00000  Uani
  C12c  .3014(6)  .6411(6)  .4708(6)  .036(4)  1.00000  Uani
  C13c  .3308(7)  .7282(6)  .4870(6)  .040(4)  1.00000  Uani
  C14c  .3889(7)  .7959(6)  .5576(7)  .040(4)  1.00000  Uani
  C15c  .4205(6)  .7797(6)  .6147(6)  .036(4)  1.00000  Uani
  C16c  .3921(6)  .6918(7)  .5986(6)  .033(4)  1.00000  Uani
  O1d  .1134(4)  .1944(4)  .0853(4)  .041(3)  1.00000  Uani
  O2d  .3471(5)  .3079(5)  .1053(5)  .056(4)  1.00000  Uani
  N1d  .1385(5)  .3570(5)  .1629(4)  .030(3)  1.00000  Uani
  N2d  .2836(5)  .4247(5)  .1889(5)  .037(3)  1.00000  Uani
  N3d  .1398(6)  .2345(6)  -.0398(5)  .044(4)  1.00000  Uani
  N4d  .2737(6)  .3427(6)  .0028(5)  .046(4)  1.00000  Uani
  C1d  .1693(7)  .4487(7)  .2011(6)  .037(4)  1.00000  Uani
  C2d  .1232(7)  .4958(7)  .2232(6)  .039(4)  1.00000  Uani
  C3d  .1747(8)  .5870(7)  .2614(6)  .048(5)  1.00000  Uani
  C4d  .2656(9)  .6273(7)  .2771(7)  .058(5)  1.00000  Uani
  C5d  .3117(8)  .5821(7)  .2583(7)  .051(5)  1.00000  Uani
  C6d  .2607(7)  .4899(6)  .2181(6)  .037(4)  1.00000  Uani
  C7d  .2081(6)  .3465(6)  .1572(5)  .033(4)  1.00000  Uani
  C8d  .2048(7)  .2575(7)  .1230(6)  .038(4)  1.00000  Uani
  C9d  .2541(7)  .2504(7)  .0677(6)  .044(4)  1.00000  Uani
  C10d  .2227(7)  .2748(7)  .0108(6)  .041(4)  1.00000  Uani
  C11d  .1394(7)  .2794(7)  -.0822(6)  .043(4)  1.00000  Uani
  C12d  .0723(8)  .2660(8)  -.1416(6)  .052(5)  1.00000  Uani
  C13d  .0955(9)  .3228(9)  -.1715(7)  .061(5)  1.00000  Uani
  C14d  .1805(11)  .3916(9)  -.1438(8)  .072(6)  1.00000  Uani
  C15d  .2469(9)  .4052(9)  -.0851(8)  .065(6)  1.00000  Uani
  C16d  .2245(7)  .3472(7)  -.0545(6)  .047(5)  1.00000  Uani
  O1e  .3062(4)  .2111(4)  .3676(4)  .041(3)  1.00000  Uani
  O2e  .2592(5)  -.0159(5)  .2629(4)  .057(3)  1.00000  Uani
  N1e  .1605(5)  .1284(5)  .3956(5)  .033(3)  1.00000  Uani
  N2e  .1131(6)  -.0044(5)  .3037(5)  .046(4)  1.00000  Uani
  N3e  .4122(5)  .1566(6)  .4515(5)  .040(4)  1.00000  Uani
  N4e  .3412(6)  .0133(6)  .4020(5)  .044(4)  1.00000  Uani
  C1e  .0823(6)  .0699(6)  .3969(6)  .031(4)  1.00000  Uani
  C2e  .0364(7)  .0841(7)  .4429(6)  .040(4)  1.00000  Uani
  C3e  -.0427(7)  .0144(8)  .4282(7)  .048(5)  1.00000  Uani
  C4e  -.0740(8)  -.0688(7)  .3690(8)  .058(5)  1.00000  Uani
  C5e  -.0268(8)  -.0838(7)  .3244(7)  .058(5)  1.00000  Uani
  C6e  .0514(7)  -.0128(6)  .3387(6)  .039(4)  1.00000  Uani
  C7e  .1775(6)  .0821(7)  .3392(6)  .036(4)  1.00000  Uani
  C8e  .2527(7)  .1196(7)  .3172(6)  .041(4)  1.00000  Uani
  C9e  .3114(7)  .0749(7)  .3153(6)  .043(4)  1.00000  Uani
  C10e  .3539(6)  .0820(7)  .3901(6)  .038(4)  1.00000  Uani
  C11e  .4386(7)  .1338(7)  .5054(6)  .039(4)  1.00000  Uani
  C12e  .4992(7)  .1840(7)  .5787(7)  .044(5)  1.00000  Uani
  C13e  .5095(8)  .1400(8)  .6176(7)  .057(5)  1.00000  Uani
  C14e  .4626(9)  .0464(8)  .5856(8)  .056(6)  1.00000  Uani
  C15e  .4041(8)  -.0034(8)  .5144(7)  .048(5)  1.00000  Uani
  C16e  .3932(7)  .0414(7)  .4751(6)  .040(4)  1.00000  Uani
  Cl1f  .37671(15)  .41098(17)  .35082(14)  .0403(9)  1.00000  Uani
  O1f  .4261(5)  .4476(6)  .3125(4)  .057(4)  1.00000  Uani
  O2f  .3278(6)  .4569(6)  .3746(5)  .061(4)  1.00000  Uani
  O3f  .4365(5)  .4162(5)  .4130(4)  .058(3)  1.00000  Uani
  O4f  .3119(5)  .3200(5)  .3027(4)  .059(3)  1.00000  Uani
  Cl1g  .02432(17)  -.00200(16)  .12225(15)  .0441(10)  1.00000  Uani
  O1g  .1002(6)  .0543(6)  .1141(6)  .069(4)  1.00000  Uani
  O2g  -.0539(6)  -.0390(6)  .0598(4)  .068(4)  1.00000  Uani
  O3g  .0382(6)  -.0714(5)  .1298(5)  .065(4)  1.00000  Uani
  O4g  .0125(5)  .0478(5)  .1866(4)  .053(3)  1.00000  Uani
  Cl1h  .5213(5)  .4917(5)  .1382(4)  .107(3)  .60000  Uani
  O1h  .4578(11)  .4552(12)  .0604(9)  .051(7)  .50000  Uiso
  O2h  .4740(10)  .4932(11)  .1976(8)  .029(4)  .50000  Uiso
  O2h'  .502(3)  .481(3)  .2003(16)  .036(11)  .20000  Uiso
  O2h''  .470(3)  .522(3)  .183(3)  .053(13)  .20000  Uiso
  O3h  .5944(11)  .5742(11)  .1598(9)  .045(5)  .40000  Uiso
  O3h'  .4503(18)  .477(3)  .0712(15)  .047(10)  .30000  Uiso
  O4h  .5555(16)  .4223(15)  .1206(14)  .063(8)  .30000  Uiso
  Cl1i  .6102(6)  .3830(6)  .1706(4)  .071(4)  .40000  Uani
  O1i  .6925(13)  .4151(17)  .2287(10)  .035(6)  .40000  Uiso
  O1i'  .672(3)  .384(4)  .227(3)  .082(17)  .25000  Uiso
  O1i''  .6989(16)  .444(3)  .2189(18)  .049(11)  .25000  Uiso
  O2i  .5355(13)  .3599(14)  .1936(12)  .048(7)  .30000  Uiso
  O3i  .5967(19)  .3105(18)  .1068(15)  .053(10)  .20000  Uiso
  O4i  .621(2)  .4520(18)  .1557(17)  .053(11)  .20000  Uiso
  Cl1j  .15258(19)  -.18292(18)  .35354(17)  .0567(12)  1.00000  Uani
  O1j  .1653(7)  -.1112(7)  .4187(6)  .096(4)  1.00000  Uiso
  O2j  .1212(15)  -.1669(14)  .2901(11)  .114(8)  .60000  Uiso
  O3j  .2373(12)  -.1795(13)  .3587(12)  .112(8)  .60000  Uiso
  O4j  .0852(11)  -.2691(11)  .3309(10)  .090(6)  .60000  Uiso
  O2j'  .2291(10)  -.1674(11)  .3326(10)  .037(5)  .40000  Uiso
  O3j'  .1201(15)  -.2581(14)  .3656(13)  .080(8)  .40000  Uiso
  O4j'  .0848(14)  -.1896(14)  .2942(11)  .062(7)  .40000  Uiso
  Cl1k  .4328(3)  -.0593(3)  .2158(3)  .0972(19)  1.00000  Uani
  O1k  .4520(10)  .0058(9)  .2886(8)  .086(5)  .70000  Uiso
  O2k  .3490(10)  -.0821(10)  .1727(9)  .098(5)  .70000  Uiso
  O3k  .4466(16)  -.1312(15)  .2136(14)  .186(12)  .70000  Uiso
  O4k  .4995(14)  -.0078(14)  .1903(12)  .166(9)  .70000  Uiso
  O1k'  .4852(18)  .0284(16)  .2640(16)  .085(11)  .30000  Uiso
  O2k'  .379(3)  -.082(3)  .1422(16)  .125(15)  .30000  Uiso
  O3k'  .4850(16)  -.1069(15)  .2131(13)  .045(7)  .30000  Uiso
  O4k'  .3640(18)  -.1020(19)  .2467(16)  .096(11)  .30000  Uiso
  Cl1l  .3951(3)  .1542(4)  .16761(18)  .099(3)  1.00000  Uani
  O1l  .4468(13)  .1467(14)  .1188(11)  .082(8)  .50000  Uiso
  O2l  .3330(12)  .1765(12)  .1397(10)  .072(6)  .50000  Uiso
  O3l  .4392(10)  .1932(11)  .2390(8)  .045(5)  .50000  Uiso
  O4l  .3201(11)  .0544(11)  .1551(10)  .072(5)  .50000  Uiso
  O1l'  .4265(12)  .1125(13)  .1155(10)  .062(6)  .50000  Uiso
  O2l'  .4469(12)  .2625(12)  .1971(11)  .091(7)  .50000  Uiso
  O3l'  .4387(13)  .1551(15)  .2323(11)  .095(8)  .50000  Uiso
  O4l'  .3122(11)  .1340(12)  .1418(10)  .070(6)  .50000  Uiso
  O1p  .8951(5)  .3260(5)  .1658(4)  .051(3)  1.00000  Uani
  C1p  .8537(11)  .3798(11)  .1558(9)  .087(8)  1.00000  Uani
  C2p  .8337(15)  .3760(16)  .0833(14)  .150(9)  1.00000  Uiso
  O1q  .8771(5)  .6948(5)  .4461(4)  .042(3)  1.00000  Uani
  C1q  .9056(8)  .7100(8)  .3881(7)  .052(5)  1.00000  Uani
  C2q  .8307(9)  .7071(9)  .3320(8)  .073(6)  1.00000  Uani
  O1r  .4082(16)  .6986(14)  .1250(15)  .123(13)  .50000  Uani
  C1r  .322(3)  .669(3)  .115(3)  .137(19)  .50000  Uani
  C2r  .270(3)  .587(2)  .0832(14)  .085(13)  .50000  Uani
  O1s  .6555(13)  .2486(15)  .1945(12)  .143(11)  .60000  Uani
  C1s  .6728(14)  .2074(13)  .2336(12)  .056(6)  .60000  Uiso
  C2s  .7562(13)  .2787(13)  .2935(11)  .056(6)  .60000  Uiso
  O1t  .557(3)  .130(3)  -.0098(18)  .161(14)  .40000  Uiso
  C1t  .5907(19)  .1064(16)  .0474(15)  .060(9)  .40000  Uiso
  C2t  .641(3)  .176(3)  .1354(16)  .077(11)  .40000  Uiso
  O1w  .5150(5)  .6618(5)  .4969(4)  .048(3)  1.00000  Uani
  O2w  .5478(13)  .3946(13)  -.0265(11)  .090(6)  .50000  Uiso
  H02a  -.03333  .35370  .25921  .04000  1.00000  Uiso
  H04a  .04812  .26133  .45395  .04000  1.00000  Uiso
  H2a  .16943  .57401  .53760  .04000  1.00000  Uiso
  H3a  .08150  .64717  .54905  .04000  1.00000  Uiso
  H4a  -.04027  .60772  .44363  .04000  1.00000  Uiso
  H5a  -.08256  .48610  .32913  .04000  1.00000  Uiso
  H8a  .15132  .32170  .28175  .04000  1.00000  Uiso
  H9a  .10265  .19257  .29983  .04000  1.00000  Uiso
  H12a  -.26193  .05607  .23335  .04000  1.00000  Uiso
  H13a  -.33611  .05049  .31646  .04000  1.00000  Uiso
  H14a  -.26035  .12277  .44509  .04000  1.00000  Uiso
  H15a  -.10180  .20658  .49616  .04000  1.00000  Uiso
  H02b  -.23028  .10828  -.10473  .04000  1.00000  Uiso
  H04b  -.37094  -.09664  -.01266  .04000  1.00000  Uiso
  H2b  .06952  .40383  .04509  .04000  1.00000  Uiso
  H3b  .03506  .45328  -.04321  .04000  1.00000  Uiso
  H4b  -.09437  .36483  -.15020  .04000  1.00000  Uiso
  H5b  -.20078  .22432  -.17139  .04000  1.00000  Uiso
  H8b  -.14955  .04406  -.00990  .04000  1.00000  Uiso
  H9b  -.28403  .04540  -.01382  .04000  1.00000  Uiso
  H12b  -.13893  -.03844  .22600  .04000  1.00000  Uiso
  H13b  -.22570  -.17957  .21142  .04000  1.00000  Uiso
  H14b  -.36295  -.27834  .11477  .04000  1.00000  Uiso
  H15b  -.41859  -.24001  .02394  .04000  1.00000  Uiso
  H02c  .44876  .41717  .70748  .04000  1.00000  Uiso
  H04c  .45003  .68386  .69323  .04000  1.00000  Uiso
  H2c  .22609  .08701  .51278  .04000  1.00000  Uiso
  H3c  .26072  .03913  .59933  .04000  1.00000  Uiso
  H4c  .36125  .13456  .72163  .04000  1.00000  Uiso
  H5c  .43581  .29116  .76246  .04000  1.00000  Uiso
  H8c  .42907  .45370  .57444  .04000  1.00000  Uiso
  H9c  .40971  .52818  .67497  .04000  1.00000  Uiso
  H12c  .26082  .59369  .42140  .04000  1.00000  Uiso
  H13c  .31048  .74304  .44810  .04000  1.00000  Uiso
  H14c  .40773  .85694  .56680  .04000  1.00000  Uiso
  H15c  .46078  .82759  .66407  .04000  1.00000  Uiso
  H02d  .34353  .43313  .19048  .04000  1.00000  Uiso
  H04d  .33706  .38336  .03329  .04000  1.00000  Uiso
  H2d  .05907  .46663  .21282  .04000  1.00000  Uiso
  H3d  .14558  .62337  .27758  .04000  1.00000  Uiso
  H4d  .29816  .69170  .30304  .04000  1.00000  Uiso
  H5d  .37650  .61191  .27195  .04000  1.00000  Uiso
  H8d  .23487  .24785  .16203  .04000  1.00000  Uiso
  H9d  .24140  .18876  .04397  .04000  1.00000  Uiso
  H12d  .01120  .21798  -.16108  .04000  1.00000  Uiso
  H13d  .04993  .31434  -.21396  .04000  1.00000  Uiso
  H14d  .19357  .43145  -.16633  .04000  1.00000  Uiso
  H15d  .30771  .45360  -.06567  .04000  1.00000  Uiso
  H02e  .11089  -.05167  .26128  .04000  1.00000  Uiso
  H04e  .30117  -.04817  .36526  .04000  1.00000  Uiso
  H2e  .05874  .14192  .48474  .04000  1.00000  Uiso
  H3e  -.07776  .02292  .45963  .04000  1.00000  Uiso
  H4e  -.13107  -.11707  .35940  .04000  1.00000  Uiso
  H5e  -.04764  -.14238  .28404  .04000  1.00000  Uiso
  H8e  .22719  .11052  .26676  .04000  1.00000  Uiso
  H9e  .35970  .10483  .30088  .04000  1.00000  Uiso
  H12e  .53257  .24831  .60081  .04000  1.00000  Uiso
  H13e  .55052  .17343  .66944  .04000  1.00000  Uiso
  H14e  .47265  .01744  .61579  .04000  1.00000  Uiso
  H15e  .37183  -.06775  .49237  .04000  1.00000  Uiso
 
 
loop_
_atom_site_aniso_label
_atom_site_aniso_U_11
_atom_site_aniso_U_22
_atom_site_aniso_U_33
_atom_site_aniso_U_12
_atom_site_aniso_U_13
_atom_site_aniso_U_23
  Cu1  .0320(7)  .0281(7)  .0235(6)  .0087(6)  .0050(5)  .0093(6)
  Cu2  .0259(7)  .0297(7)  .0239(6)  .0066(5)  .0038(5)  .0086(6)
  Cu3  .0267(6)  .0237(6)  .0250(6)  .0074(5)  .0029(5)  .0082(6)
  Cu4  .0268(6)  .0243(6)  .0275(7)  .0074(5)  .0044(5)  .0103(6)
  O1a  .026(4)  .028(4)  .027(4)  .010(3)  .003(3)  .011(3)
  O2a  .025(4)  .026(4)  .020(4)  .007(3)  .002(3)  .007(3)
  N1a  .034(5)  .021(4)  .026(5)  .007(4)  .006(4)  .008(4)
  N2a  .025(5)  .030(5)  .031(5)  .012(4)  -.000(4)  .010(4)
  N3a  .021(4)  .028(4)  .028(5)  .005(4)  .005(4)  .011(4)
  N4a  .027(5)  .026(4)  .022(4)  .006(4)  .009(4)  .007(4)
  C1a  .037(6)  .027(5)  .035(6)  .018(5)  .016(5)  .015(5)
  C2a  .042(6)  .031(6)  .035(6)  .014(5)  .013(5)  .015(5)
  C3a  .050(7)  .031(6)  .044(7)  .022(6)  .018(6)  .006(5)
  C4a  .055(7)  .042(7)  .066(8)  .033(6)  .030(7)  .020(7)
  C5a  .048(7)  .042(6)  .038(6)  .026(6)  .010(5)  .018(6)
  C6a  .033(6)  .032(6)  .036(6)  .017(5)  .012(5)  .015(5)
  C7a  .031(5)  .026(5)  .018(5)  .013(5)  .008(4)  .007(5)
  C8a  .027(5)  .024(5)  .018(5)  .010(4)  .005(4)  .004(5)
  C9a  .027(5)  .026(5)  .020(5)  .011(4)  .003(4)  .006(5)
  C10a  .026(5)  .019(5)  .030(6)  .009(4)  .010(4)  .012(5)
  C11a  .021(5)  .034(6)  .034(6)  .011(4)  .011(5)  .013(5)
  C12a  .034(6)  .037(6)  .042(6)  .015(5)  .012(5)  .017(5)
  C13a  .023(5)  .034(6)  .058(7)  .008(5)  .013(5)  .018(6)
  C14a  .040(6)  .037(6)  .051(7)  .019(5)  .027(6)  .022(6)
  C15a  .038(6)  .035(6)  .031(6)  .013(5)  .015(5)  .015(5)
  C16a  .030(6)  .029(5)  .041(6)  .017(5)  .017(5)  .016(5)
  O1b  .031(4)  .040(4)  .021(4)  .010(3)  .003(3)  .011(4)
  O2b  .053(5)  .043(5)  .067(6)  .028(4)  .024(4)  .025(5)
  N1b  .031(5)  .038(5)  .030(5)  .011(4)  .007(4)  .012(5)
  N2b  .037(5)  .068(7)  .032(5)  .011(5)  .002(4)  .025(5)
  N3b  .035(5)  .033(5)  .033(5)  .010(4)  .009(4)  .018(5)
  N4b  .022(5)  .043(5)  .042(6)  -.004(4)  -.001(4)  .003(5)
  C1b  .048(7)  .046(7)  .037(6)  .027(6)  .021(5)  .029(6)
  C2b  .065(8)  .055(7)  .039(7)  .037(7)  .028(6)  .025(6)
  C3b  .076(9)  .056(8)  .062(8)  .035(7)  .035(7)  .038(7)
  C4b  .091(11)  .112(12)  .064(9)  .061(10)  .025(9)  .069(10)
  C5b  .070(9)  .118(13)  .050(8)  .035(9)  .008(7)  .057(9)
  C6b  .041(7)  .069(8)  .034(7)  .020(6)  .007(5)  .026(7)
  C7b  .039(6)  .045(6)  .030(6)  .017(5)  .014(5)  .018(6)
  C8b  .034(6)  .031(6)  .022(5)  .008(5)  .001(5)  .006(5)
  C9b  .024(6)  .054(7)  .033(6)  .011(5)  .001(5)  .012(6)
  C10b  .033(6)  .031(6)  .038(6)  .010(5)  .017(5)  .010(5)
  C11b  .033(6)  .042(7)  .033(6)  .014(5)  .014(5)  .012(6)
  C12b  .036(6)  .039(6)  .037(6)  .006(5)  .011(5)  .013(6)
  C13b  .060(8)  .041(7)  .053(7)  .020(6)  .023(6)  .024(6)
  C14b  .059(8)  .038(7)  .058(8)  .011(6)  .031(7)  .018(7)
  C15b  .042(7)  .033(6)  .050(7)  -.004(6)  .010(6)  .006(6)
  C16b  .038(6)  .038(6)  .032(6)  .010(5)  .008(5)  .007(6)
  O1c  .028(4)  .031(4)  .022(4)  .006(3)  .001(3)  .012(3)
  O2c  .035(4)  .032(4)  .041(4)  .009(3)  .013(4)  .017(4)
  N1c  .025(5)  .029(5)  .035(5)  .008(4)  .008(4)  .010(5)
  N2c  .038(5)  .035(5)  .030(5)  .017(4)  -.000(4)  .014(4)
  N3c  .036(5)  .029(5)  .026(5)  .012(4)  .008(4)  .016(4)
  N4c  .034(5)  .023(4)  .027(5)  .009(4)  .000(4)  .006(4)
  C1c  .035(6)  .035(6)  .032(6)  .020(5)  .014(5)  .020(5)
  C2c  .041(6)  .030(6)  .041(6)  .016(5)  .012(5)  .020(6)
  C3c  .051(7)  .047(7)  .071(9)  .033(6)  .032(7)  .035(7)
  C4c  .071(8)  .054(8)  .055(8)  .041(7)  .032(7)  .036(7)
  C5c  .066(8)  .053(7)  .040(6)  .041(7)  .018(6)  .030(6)
  C6c  .040(6)  .038(6)  .043(7)  .021(5)  .019(5)  .024(6)
  C7c  .033(6)  .027(5)  .029(6)  .015(5)  .008(5)  .011(5)
  C8c  .023(5)  .039(6)  .025(5)  .011(5)  .003(4)  .012(5)
  C9c  .032(6)  .030(5)  .019(5)  .010(5)  .002(4)  .008(5)
  C10c  .028(5)  .028(5)  .033(6)  .010(5)  .010(5)  .014(5)
  C11c  .036(6)  .027(5)  .027(5)  .013(5)  .014(5)  .014(5)
  C12c  .032(6)  .030(6)  .034(6)  .008(5)  .008(5)  .010(5)
  C13c  .041(6)  .027(6)  .053(7)  .011(5)  .017(5)  .024(6)
  C14c  .040(6)  .028(6)  .058(7)  .018(5)  .022(6)  .024(6)
  C15c  .033(6)  .025(5)  .040(6)  .007(5)  .007(5)  .015(5)
  C16c  .022(5)  .032(6)  .032(6)  .008(5)  .008(5)  .009(5)
  O1d  .035(4)  .031(4)  .043(4)  .010(3)  .014(4)  .007(4)
  O2d  .030(4)  .058(5)  .066(6)  .013(4)  .011(4)  .025(5)
  N1d  .036(5)  .033(5)  .026(5)  .019(4)  .010(4)  .015(4)
  N2d  .032(5)  .032(5)  .039(5)  .008(4)  .009(4)  .017(5)
  N3d  .040(6)  .047(6)  .036(5)  .014(5)  .015(5)  .017(5)
  N4d  .037(5)  .035(5)  .045(6)  .003(4)  .010(5)  .013(5)
  C1d  .045(6)  .029(6)  .030(6)  .010(5)  .010(5)  .016(5)
  C2d  .046(7)  .033(6)  .037(6)  .019(5)  .014(5)  .016(5)
  C3d  .067(8)  .035(6)  .042(7)  .027(6)  .018(6)  .016(6)
  C4d  .065(9)  .030(6)  .046(7)  .007(6)  .014(6)  .002(6)
  C5d  .049(7)  .031(6)  .054(8)  .002(6)  .016(6)  .018(6)
  C6d  .037(6)  .025(5)  .039(6)  .005(5)  .010(5)  .016(5)
  C7d  .031(6)  .030(6)  .026(5)  .008(5)  .004(5)  .012(5)
  C8d  .035(6)  .034(6)  .046(7)  .013(5)  .017(5)  .019(6)
  C9d  .031(6)  .043(6)  .047(7)  .013(5)  .014(5)  .012(6)
  C10d  .041(7)  .037(6)  .037(6)  .016(5)  .014(5)  .010(6)
  C11d  .045(7)  .038(6)  .031(6)  .015(5)  .013(5)  .005(6)
  C12d  .053(7)  .057(8)  .035(7)  .022(6)  .014(6)  .013(6)
  C13d  .074(9)  .058(8)  .041(7)  .026(7)  .019(7)  .017(7)
  C14d  .106(12)  .057(8)  .056(9)  .029(8)  .034(9)  .035(8)
  C15d  .064(9)  .055(8)  .053(8)  .013(7)  .021(7)  .017(7)
  C16d  .043(7)  .043(7)  .037(7)  .009(6)  .009(6)  .015(6)
  O1e  .031(4)  .032(4)  .042(4)  .005(3)  .009(3)  .011(4)
  O2e  .061(5)  .043(5)  .043(5)  .018(4)  .015(4)  .002(4)
  N1e  .025(5)  .034(5)  .034(5)  .011(4)  .009(4)  .013(4)
  N2e  .037(5)  .024(5)  .046(6)  .004(4)  .015(5)  -.005(4)
  N3e  .036(5)  .040(5)  .041(5)  .016(4)  .014(4)  .019(5)
  N4e  .053(6)  .037(5)  .039(6)  .018(5)  .020(5)  .015(5)
  C1e  .032(6)  .029(6)  .037(6)  .013(5)  .015(5)  .021(5)
  C2e  .039(6)  .036(6)  .040(6)  .014(5)  .015(5)  .017(5)
  C3e  .045(7)  .053(7)  .063(8)  .028(6)  .029(6)  .035(7)
  C4e  .045(7)  .036(7)  .083(9)  .013(6)  .030(7)  .020(7)
  C5e  .050(7)  .032(6)  .069(9)  .009(6)  .023(7)  .007(6)
  C6e  .035(6)  .025(5)  .048(7)  .012(5)  .013(5)  .010(5)
  C7e  .026(5)  .038(6)  .035(6)  .011(5)  .007(5)  .013(5)
  C8e  .043(6)  .039(6)  .032(6)  .012(5)  .008(5)  .018(5)
  C9e  .041(6)  .046(7)  .042(7)  .022(6)  .022(5)  .016(6)
  C10e  .029(6)  .042(7)  .040(6)  .014(5)  .013(5)  .018(6)
  C11e  .037(6)  .036(6)  .037(6)  .012(5)  .016(5)  .014(6)
  C12e  .036(6)  .042(6)  .059(8)  .018(5)  .020(6)  .026(7)
  C13e  .048(7)  .058(8)  .056(8)  .017(6)  .017(6)  .026(7)
  C14e  .076(9)  .057(8)  .071(9)  .041(7)  .045(8)  .047(8)
  C15e  .057(7)  .047(7)  .047(7)  .024(6)  .025(6)  .027(7)
  C16e  .043(6)  .041(6)  .046(7)  .024(5)  .024(5)  .023(6)
  Cl1f  .0319(13)  .0436(14)  .0366(14)  .0104(12)  .0084(11)  .0190(13)
  O1f  .033(4)  .089(6)  .050(5)  .013(4)  .019(4)  .048(5)
  O2f  .077(6)  .066(5)  .068(6)  .047(5)  .039(5)  .038(5)
  O3f  .038(4)  .070(6)  .047(5)  .007(4)  -.005(4)  .036(5)
  O4f  .054(5)  .041(5)  .044(5)  .000(4)  .003(4)  .011(4)
  Cl1g  .0510(16)  .0329(13)  .0433(15)  .0174(12)  .0201(13)  .0129(13)
  O1g  .063(6)  .071(6)  .103(7)  .031(5)  .048(5)  .059(6)
  O2g  .069(6)  .059(5)  .036(5)  .019(5)  -.001(4)  .000(4)
  O3g  .090(7)  .038(5)  .083(6)  .040(5)  .038(5)  .032(5)
  O4g  .061(5)  .051(5)  .037(5)  .030(4)  .018(4)  .007(4)
  Cl1h  .082(5)  .100(5)  .059(4)  -.004(4)  .022(4)  .005(4)
  Cl1i  .076(6)  .097(7)  .045(5)  .058(5)  .022(4)  .018(5)
  Cl1j  .0550(18)  .0434(16)  .0612(19)  .0199(14)  .0175(15)  .0179(15)
  Cl1k  .113(4)  .101(3)  .077(3)  .070(3)  .016(3)  .028(3)
  Cl1l  .127(4)  .168(5)  .0413(19)  .118(4)  .024(2)  .041(3)
  O1p  .045(5)  .066(5)  .038(4)  .031(4)  .006(4)  .021(4)
  C1p  .102(12)  .116(13)  .069(10)  .074(10)  .024(9)  .048(10)
  O1q  .038(4)  .044(4)  .028(4)  .015(4)  .005(3)  .009(4)
  C1q  .052(7)  .063(8)  .053(7)  .027(6)  .025(6)  .035(7)
  C2q  .069(9)  .075(9)  .063(9)  .020(7)  .011(7)  .042(8)
  O1r  .088(16)  .071(14)  .17(3)  .030(13)  .001(15)  .040(15)
  C1r  .11(3)  .10(3)  .12(3)  -.04(3)  -.01(3)  .09(3)
  C2r  .12(3)  .070(19)  .044(15)  .050(19)  .014(16)  .010(15)
  O1s  .105(15)  .133(18)  .090(14)  .042(13)  -.011(12)  -.016(14)
  O1w  .039(4)  .044(5)  .057(5)  .017(4)  .021(4)  .022(4)
 
 
loop_
_geom_bond_atom_site_label_1
_geom_bond_atom_site_label_2
_geom_bond_site_symmetry_1
_geom_bond_site_symmetry_2
_geom_bond_distance
  Cu1  Cu2  .  .  3.063(2)
  Cu1  O1a  .  .  1.965(8)
  Cu1  O1b  .  .  1.912(6)
  Cu1  N1b  .  .  1.966(9)
  Cu1  O1d  .  .  2.349(8)
  Cu1  N1d  .  .  1.959(7)
  Cu2  O1a  .  .  1.973(6)
  Cu2  N3a  .  .  1.954(9)
  Cu2  O1b  .  .  1.916(8)
  Cu2  N3b  .  .  1.966(6)
  Cu3  Cu4  .  .  3.062(3)
  Cu3  O2a  .  .  1.966(6)
  Cu3  N1a  .  .  1.936(9)
  Cu3  O1c  .  .  1.911(8)
  Cu3  N3c  .  .  1.974(6)
  Cu4  O2a  .  .  1.952(8)
  Cu4  O1c  .  .  1.908(6)
  Cu4  N1c  .  .  1.962(9)
  Cu4  O1e  .  .  2.489(8)
  Cu4  N1e  .  .  1.946(7)
  O1a  C8a  .  .  1.407(9)
  O2a  C9a  .  .  1.415(9)
  N1a  C1a  .  .  1.421(15)
  N1a  C7a  .  .  1.335(10)
  N2a  C6a  .  .  1.400(13)
  N2a  C7a  .  .  1.336(15)
  N3a  C10a  .  .  1.343(9)
  N3a  C11a  .  .  1.402(14)
  N4a  C10a  .  .  1.333(14)
  N4a  C16a  .  .  1.384(12)
  C1a  C2a  .  .  1.400(13)
  C1a  C6a  .  .  1.391(14)
  C2a  C3a  .  .  1.365(19)
  C3a  C4a  .  .  1.434(17)
  C4a  C5a  .  .  1.375(15)
  C5a  C6a  .  .  1.371(19)
  C7a  C8a  .  .  1.507(15)
  C8a  C9a  .  .  1.546(17)
  C9a  C10a  .  .  1.501(14)
  C11a  C12a  .  .  1.413(12)
  C11a  C16a  .  .  1.394(13)
  C12a  C13a  .  .  1.362(18)
  C13a  C14a  .  .  1.395(15)
  C14a  C15a  .  .  1.379(13)
  C15a  C16a  .  .  1.371(17)
  O1b  C8b  .  .  1.419(10)
  O2b  C9b  .  .  1.421(15)
  N1b  C1b  .  .  1.406(18)
  N1b  C7b  .  .  1.326(11)
  N2b  C6b  .  .  1.383(18)
  N2b  C7b  .  .  1.373(16)
  N3b  C10b  .  .  1.317(14)
  N3b  C11b  .  .  1.390(16)
  N4b  C10b  .  .  1.345(11)
  N4b  C16b  .  .  1.396(19)
  C1b  C2b  .  .  1.394(16)
  C1b  C6b  .  .  1.401(13)
  C2b  C3b  .  .  1.39(3)
  C3b  C4b  .  .  1.394(17)
  C4b  C5b  .  .  1.39(3)
  C5b  C6b  .  .  1.38(3)
  C7b  C8b  .  .  1.489(18)
  C8b  C9b  .  .  1.528(15)
  C9b  C10b  .  .  1.50(2)
  C11b  C12b  .  .  1.392(19)
  C11b  C16b  .  .  1.392(11)
  C12b  C13b  .  .  1.370(17)
  C13b  C14b  .  .  1.381(14)
  C14b  C15b  .  .  1.38(3)
  C15b  C16b  .  .  1.378(17)
  O1c  C8c  .  .  1.433(10)
  O2c  C9c  .  .  1.424(13)
  N1c  C1c  .  .  1.377(17)
  N1c  C7c  .  .  1.338(10)
  N2c  C6c  .  .  1.399(15)
  N2c  C7c  .  .  1.350(14)
  N3c  C10c  .  .  1.350(13)
  N3c  C11c  .  .  1.387(15)
  N4c  C10c  .  .  1.366(11)
  N4c  C16c  .  .  1.374(16)
  C1c  C2c  .  .  1.419(15)
  C1c  C6c  .  .  1.391(12)
  C2c  C3c  .  .  1.36(3)
  C3c  C4c  .  .  1.397(15)
  C4c  C5c  .  .  1.401(17)
  C5c  C6c  .  .  1.40(2)
  C7c  C8c  .  .  1.507(18)
  C8c  C9c  .  .  1.506(15)
  C9c  C10c  .  .  1.483(18)
  C11c  C12c  .  .  1.403(17)
  C11c  C16c  .  .  1.403(10)
  C12c  C13c  .  .  1.377(15)
  C13c  C14c  .  .  1.397(12)
  C14c  C15c  .  .  1.378(19)
  C15c  C16c  .  .  1.392(15)
  O1d  C8d  .  .  1.417(10)
  O2d  C9d  .  .  1.419(10)
  N1d  C1d  .  .  1.414(13)
  N1d  C7d  .  .  1.304(15)
  N2d  C6d  .  .  1.373(16)
  N2d  C7d  .  .  1.359(10)
  N3d  C10d  .  .  1.344(12)
  N3d  C11d  .  .  1.398(18)
  N4d  C10d  .  .  1.325(16)
  N4d  C16d  .  .  1.367(17)
  C1d  C2d  .  .  1.399(18)
  C1d  C6d  .  .  1.385(15)
  C2d  C3d  .  .  1.394(13)
  C3d  C4d  .  .  1.381(18)
  C4d  C5d  .  .  1.36(3)
  C5d  C6d  .  .  1.409(13)
  C7d  C8d  .  .  1.510(16)
  C8d  C9d  .  .  1.551(18)
  C9d  C10d  .  .  1.48(2)
  C11d  C12d  .  .  1.396(17)
  C11d  C16d  .  .  1.375(13)
  C12d  C13d  .  .  1.37(3)
  C13d  C14d  .  .  1.379(18)
  C14d  C15d  .  .  1.38(3)
  C15d  C16d  .  .  1.39(3)
  O1e  C8e  .  .  1.429(10)
  O2e  C9e  .  .  1.427(11)
  N1e  C1e  .  .  1.398(13)
  N1e  C7e  .  .  1.339(14)
  N2e  C6e  .  .  1.392(16)
  N2e  C7e  .  .  1.373(11)
  N3e  C10e  .  .  1.340(10)
  N3e  C11e  .  .  1.377(17)
  N4e  C10e  .  .  1.317(18)
  N4e  C16e  .  .  1.401(15)
  C1e  C2e  .  .  1.368(17)
  C1e  C6e  .  .  1.390(13)
  C2e  C3e  .  .  1.375(15)
  C3e  C4e  .  .  1.403(15)
  C4e  C5e  .  .  1.37(3)
  C5e  C6e  .  .  1.380(15)
  C7e  C8e  .  .  1.473(16)
  C8e  C9e  .  .  1.516(19)
  C9e  C10e  .  .  1.518(17)
  C11e  C12e  .  .  1.401(14)
  C11e  C16e  .  .  1.409(15)
  C12e  C13e  .  .  1.36(3)
  C13e  C14e  .  .  1.425(18)
  C14e  C15e  .  .  1.359(15)
  C15e  C16e  .  .  1.38(3)
  Cl1f  O1f  .  .  1.422(10)
  Cl1f  O2f  .  .  1.431(11)
  Cl1f  O3f  .  .  1.437(9)
  Cl1f  O4f  .  .  1.445(6)
  Cl1g  O1g  .  .  1.426(10)
  Cl1g  O2g  .  .  1.416(8)
  Cl1g  O3g  .  .  1.431(11)
  Cl1g  O4g  .  .  1.430(9)
  Cl1h  O1h  .  .  1.509(18)
  Cl1h  O2h  .  .  1.600(19)
  Cl1h  O3h  .  .  1.417(16)
  Cl1h  O4h  .  .  1.55(4)
  Cl1i  O1i  .  .  1.43(3)
  Cl1i  O2i  .  .  1.43(3)
  Cl1i  O3i  .  .  1.42(3)
  Cl1i  O4i  .  .  1.36(4)
  Cl1j  O1j  .  .  1.428(11)
  Cl1j  O2j  .  .  1.49(3)
  Cl1j  O3j  .  .  1.42(3)
  Cl1j  O4j  .  .  1.418(16)
  Cl1k  O1k  .  .  1.441(15)
  Cl1k  O2k  .  .  1.367(17)
  Cl1k  O3k  .  .  1.41(4)
  Cl1k  O4k  .  .  1.51(3)
  Cl1l  O1l  .  .  1.47(3)
  Cl1l  O2l  .  .  1.38(3)
  Cl1l  O3l  .  .  1.308(14)
  Cl1l  O4l  .  .  1.708(18)
  O1p  C1p  .  .  1.46(3)
  C1p  C2p  .  .  1.45(4)
  O1q  C1q  .  .  1.456(17)
  C1q  C2q  .  .  1.53(3)
  O1r  C1r  .  .  1.33(5)
  C1r  C2r  .  .  1.27(5)
  O1s  C1s  .  .  1.35(5)
  O1s  C2t  .  .  1.36(4)
  C1s  C2s  .  .  1.46(3)
  O1t  C1t  .  .  1.48(6)
  C1t  C2t  .  .  1.64(4)
 
 
loop_
_geom_angle_atom_site_label_1
_geom_angle_atom_site_label_2
_geom_angle_atom_site_label_3
_geom_angle_site_symmetry_1
_geom_angle_site_symmetry_2
_geom_angle_site_symmetry_3
_geom_angle
  Cu2  Cu1  O1a  .  .  .  39.03(14)
  Cu2  Cu1  O1b  .  .  .  36.9(3)
  Cu2  Cu1  N1b  .  .  .  115.9(3)
  Cu2  Cu1  O1d  .  .  .  102.3(2)
  Cu2  Cu1  N1d  .  .  .  136.8(3)
  O1a  Cu1  O1b  .  .  .  75.8(3)
  O1a  Cu1  N1b  .  .  .  150.5(4)
  O1a  Cu1  O1d  .  .  .  102.8(3)
  O1a  Cu1  N1d  .  .  .  98.4(3)
  O1b  Cu1  N1b  .  .  .  82.5(4)
  O1b  Cu1  O1d  .  .  .  92.8(3)
  O1b  Cu1  N1d  .  .  .  166.0(4)
  N1b  Cu1  O1d  .  .  .  98.0(4)
  N1b  Cu1  N1d  .  .  .  106.9(4)
  O1d  Cu1  N1d  .  .  .  75.9(4)
  Cu1  Cu2  O1a  .  .  .  38.8(2)
  Cu1  Cu2  N3a  .  .  .  130.0(2)
  Cu1  Cu2  O1b  .  .  .  36.82(15)
  Cu1  Cu2  N3b  .  .  .  126.4(3)
  O1a  Cu2  N3a  .  .  .  92.2(3)
  O1a  Cu2  O1b  .  .  .  75.5(3)
  O1a  Cu2  N3b  .  .  .  165.1(4)
  N3a  Cu2  O1b  .  .  .  165.6(3)
  N3a  Cu2  N3b  .  .  .  101.8(4)
  O1b  Cu2  N3b  .  .  .  89.9(4)
  Cu4  Cu3  O2a  .  .  .  38.5(3)
  Cu4  Cu3  N1a  .  .  .  127.4(2)
  Cu4  Cu3  O1c  .  .  .  36.65(14)
  Cu4  Cu3  N3c  .  .  .  127.2(3)
  O2a  Cu3  N1a  .  .  .  90.7(3)
  O2a  Cu3  O1c  .  .  .  74.7(3)
  O2a  Cu3  N3c  .  .  .  165.7(4)
  N1a  Cu3  O1c  .  .  .  162.7(3)
  N1a  Cu3  N3c  .  .  .  103.0(4)
  O1c  Cu3  N3c  .  .  .  91.0(4)
  Cu3  Cu4  O2a  .  .  .  38.77(14)
  Cu3  Cu4  O1c  .  .  .  36.7(3)
  Cu3  Cu4  N1c  .  .  .  116.1(3)
  Cu3  Cu4  O1e  .  .  .  105.1(2)
  Cu3  Cu4  N1e  .  .  .  137.2(3)
  O2a  Cu4  O1c  .  .  .  75.1(3)
  O2a  Cu4  N1c  .  .  .  152.5(4)
  O2a  Cu4  O1e  .  .  .  95.3(3)
  O2a  Cu4  N1e  .  .  .  98.5(4)
  O1c  Cu4  N1c  .  .  .  82.4(4)
  O1c  Cu4  O1e  .  .  .  102.0(3)
  O1c  Cu4  N1e  .  .  .  172.5(4)
  N1c  Cu4  O1e  .  .  .  104.8(4)
  N1c  Cu4  N1e  .  .  .  104.9(4)
  O1e  Cu4  N1e  .  .  .  74.3(3)
  Cu1  O1a  Cu2  .  .  .  102.1(3)
  Cu1  O1a  C8a  .  .  .  129.5(6)
  Cu2  O1a  C8a  .  .  .  127.9(7)
  Cu3  O2a  Cu4  .  .  .  102.8(3)
  Cu3  O2a  C9a  .  .  .  127.3(7)
  Cu4  O2a  C9a  .  .  .  129.8(6)
  Cu3  N1a  C1a  .  .  .  132.7(6)
  Cu3  N1a  C7a  .  .  .  122.2(8)
  C1a  N1a  C7a  .  .  .  104.8(9)
  C6a  N2a  C7a  .  .  .  108.0(7)
  Cu2  N3a  C10a  .  .  .  120.0(7)
  Cu2  N3a  C11a  .  .  .  133.8(6)
  C10a  N3a  C11a  .  .  .  105.3(8)
  C10a  N4a  C16a  .  .  .  108.8(7)
  N1a  C1a  C2a  .  .  .  130.2(10)
  N1a  C1a  C6a  .  .  .  108.9(8)
  C2a  C1a  C6a  .  .  .  121.0(11)
  C1a  C2a  C3a  .  .  .  117.6(10)
  C2a  C3a  C4a  .  .  .  120.8(10)
  C3a  C4a  C5a  .  .  .  120.8(13)
  C4a  C5a  C6a  .  .  .  117.9(11)
  N2a  C6a  C1a  .  .  .  105.4(10)
  N2a  C6a  C5a  .  .  .  132.6(9)
  C1a  C6a  C5a  .  .  .  121.9(9)
  N1a  C7a  N2a  .  .  .  112.8(9)
  N1a  C7a  C8a  .  .  .  123.1(10)
  N2a  C7a  C8a  .  .  .  124.0(7)
  O1a  C8a  C7a  .  .  .  111.5(9)
  O1a  C8a  C9a  .  .  .  109.9(7)
  C7a  C8a  C9a  .  .  .  109.1(9)
  O2a  C9a  C8a  .  .  .  110.7(7)
  O2a  C9a  C10a  .  .  .  111.0(8)
  C8a  C9a  C10a  .  .  .  110.1(9)
  N3a  C10a  N4a  .  .  .  111.6(9)
  N3a  C10a  C9a  .  .  .  123.7(9)
  N4a  C10a  C9a  .  .  .  124.6(7)
  N3a  C11a  C12a  .  .  .  130.9(9)
  N3a  C11a  C16a  .  .  .  109.0(7)
  C12a  C11a  C16a  .  .  .  120.0(10)
  C11a  C12a  C13a  .  .  .  116.0(9)
  C12a  C13a  C14a  .  .  .  123.9(9)
  C13a  C14a  C15a  .  .  .  119.9(12)
  C14a  C15a  C16a  .  .  .  117.5(9)
  N4a  C16a  C11a  .  .  .  105.2(10)
  N4a  C16a  C15a  .  .  .  132.1(8)
  C11a  C16a  C15a  .  .  .  122.7(8)
  Cu1  O1b  Cu2  .  .  .  106.3(3)
  Cu1  O1b  C8b  .  .  .  119.1(7)
  Cu2  O1b  C8b  .  .  .  129.0(6)
  Cu1  N1b  C1b  .  .  .  141.2(6)
  Cu1  N1b  C7b  .  .  .  111.9(9)
  C1b  N1b  C7b  .  .  .  106.5(9)
  C6b  N2b  C7b  .  .  .  108.6(8)
  Cu2  N3b  C10b  .  .  .  121.1(8)
  Cu2  N3b  C11b  .  .  .  132.3(7)
  C10b  N3b  C11b  .  .  .  106.5(7)
  C10b  N4b  C16b  .  .  .  109.1(9)
  N1b  C1b  C2b  .  .  .  129.7(9)
  N1b  C1b  C6b  .  .  .  108.9(10)
  C2b  C1b  C6b  .  .  .  121.3(13)
  C1b  C2b  C3b  .  .  .  115.9(9)
  C2b  C3b  C4b  .  .  .  122.6(13)
  C3b  C4b  C5b  .  .  .  121.4(18)
  C4b  C5b  C6b  .  .  .  116.6(12)
  N2b  C6b  C1b  .  .  .  105.3(12)
  N2b  C6b  C5b  .  .  .  132.4(9)
  C1b  C6b  C5b  .  .  .  122.3(12)
  N1b  C7b  N2b  .  .  .  110.7(11)
  N1b  C7b  C8b  .  .  .  121.0(10)
  N2b  C7b  C8b  .  .  .  128.3(8)
  O1b  C8b  C7b  .  .  .  105.2(7)
  O1b  C8b  C9b  .  .  .  110.4(9)
  C7b  C8b  C9b  .  .  .  114.3(11)
  O2b  C9b  C8b  .  .  .  108.0(8)
  O2b  C9b  C10b  .  .  .  110.8(10)
  C8b  C9b  C10b  .  .  .  108.6(11)
  N3b  C10b  N4b  .  .  .  110.9(11)
  N3b  C10b  C9b  .  .  .  124.4(8)
  N4b  C10b  C9b  .  .  .  124.6(10)
  N3b  C11b  C12b  .  .  .  131.7(7)
  N3b  C11b  C16b  .  .  .  109.7(11)
  C12b  C11b  C16b  .  .  .  118.7(11)
  C11b  C12b  C13b  .  .  .  117.3(9)
  C12b  C13b  C14b  .  .  .  123.1(14)
  C13b  C14b  C15b  .  .  .  120.9(12)
  C14b  C15b  C16b  .  .  .  115.7(9)
  N4b  C16b  C11b  .  .  .  103.8(10)
  N4b  C16b  C15b  .  .  .  131.9(9)
  C11b  C16b  C15b  .  .  .  124.3(13)
  Cu3  O1c  Cu4  .  .  .  106.6(3)
  Cu3  O1c  C8c  .  .  .  130.0(7)
  Cu4  O1c  C8c  .  .  .  119.7(7)
  Cu4  N1c  C1c  .  .  .  140.4(5)
  Cu4  N1c  C7c  .  .  .  113.0(8)
  C1c  N1c  C7c  .  .  .  106.1(8)
  C6c  N2c  C7c  .  .  .  107.1(7)
  Cu3  N3c  C10c  .  .  .  120.9(8)
  Cu3  N3c  C11c  .  .  .  131.0(7)
  C10c  N3c  C11c  .  .  .  108.0(7)
  C10c  N4c  C16c  .  .  .  108.9(8)
  N1c  C1c  C2c  .  .  .  131.4(8)
  N1c  C1c  C6c  .  .  .  109.4(9)
  C2c  C1c  C6c  .  .  .  119.2(12)
  C1c  C2c  C3c  .  .  .  116.6(9)
  C2c  C3c  C4c  .  .  .  124.8(12)
  C3c  C4c  C5c  .  .  .  119.8(14)
  C4c  C5c  C6c  .  .  .  115.7(9)
  N2c  C6c  C1c  .  .  .  105.6(11)
  N2c  C6c  C5c  .  .  .  130.4(8)
  C1c  C6c  C5c  .  .  .  124.0(10)
  N1c  C7c  N2c  .  .  .  111.8(10)
  N1c  C7c  C8c  .  .  .  119.7(9)
  N2c  C7c  C8c  .  .  .  128.5(7)
  O1c  C8c  C7c  .  .  .  104.6(7)
  O1c  C8c  C9c  .  .  .  111.3(9)
  C7c  C8c  C9c  .  .  .  113.9(10)
  O2c  C9c  C8c  .  .  .  109.9(7)
  O2c  C9c  C10c  .  .  .  108.7(10)
  C8c  C9c  C10c  .  .  .  111.2(9)
  N3c  C10c  N4c  .  .  .  109.0(10)
  N3c  C10c  C9c  .  .  .  125.8(7)
  N4c  C10c  C9c  .  .  .  125.0(9)
  N3c  C11c  C12c  .  .  .  131.6(7)
  N3c  C11c  C16c  .  .  .  107.7(10)
  C12c  C11c  C16c  .  .  .  120.7(10)
  C11c  C12c  C13c  .  .  .  117.1(8)
  C12c  C13c  C14c  .  .  .  121.5(12)
  C13c  C14c  C15c  .  .  .  122.3(11)
  C14c  C15c  C16c  .  .  .  116.6(8)
  N4c  C16c  C11c  .  .  .  106.4(9)
  N4c  C16c  C15c  .  .  .  131.8(8)
  C11c  C16c  C15c  .  .  .  121.8(11)
  Cu1  O1d  C8d  .  .  .  110.9(6)
  Cu1  N1d  C1d  .  .  .  133.4(8)
  Cu1  N1d  C7d  .  .  .  120.1(7)
  C1d  N1d  C7d  .  .  .  106.5(8)
  C6d  N2d  C7d  .  .  .  107.5(9)
  C10d  N3d  C11d  .  .  .  107.9(9)
  C10d  N4d  C16d  .  .  .  109.5(9)
  N1d  C1d  C2d  .  .  .  130.4(9)
  N1d  C1d  C6d  .  .  .  107.6(11)
  C2d  C1d  C6d  .  .  .  122.0(9)
  C1d  C2d  C3d  .  .  .  115.7(10)
  C2d  C3d  C4d  .  .  .  121.6(13)
  C3d  C4d  C5d  .  .  .  123.3(10)
  C4d  C5d  C6d  .  .  .  116.1(10)
  N2d  C6d  C1d  .  .  .  106.6(8)
  N2d  C6d  C5d  .  .  .  132.1(10)
  C1d  C6d  C5d  .  .  .  121.3(12)
  N1d  C7d  N2d  .  .  .  111.7(10)
  N1d  C7d  C8d  .  .  .  123.4(8)
  N2d  C7d  C8d  .  .  .  124.7(10)
  O1d  C8d  C7d  .  .  .  106.8(9)
  O1d  C8d  C9d  .  .  .  109.5(8)
  C7d  C8d  C9d  .  .  .  112.5(10)
  O2d  C9d  C8d  .  .  .  110.4(8)
  O2d  C9d  C10d  .  .  .  107.0(10)
  C8d  C9d  C10d  .  .  .  112.2(11)
  N3d  C10d  N4d  .  .  .  109.1(12)
  N3d  C10d  C9d  .  .  .  126.8(11)
  N4d  C10d  C9d  .  .  .  124.1(9)
  N3d  C11d  C12d  .  .  .  132.3(10)
  N3d  C11d  C16d  .  .  .  106.3(10)
  C12d  C11d  C16d  .  .  .  121.4(13)
  C11d  C12d  C13d  .  .  .  117.0(10)
  C12d  C13d  C14d  .  .  .  122.2(14)
  C13d  C14d  C15d  .  .  .  121.1(16)
  C14d  C15d  C16d  .  .  .  117.4(11)
  N4d  C16d  C11d  .  .  .  107.3(12)
  N4d  C16d  C15d  .  .  .  131.8(9)
  C11d  C16d  C15d  .  .  .  120.9(12)
  Cu4  O1e  C8e  .  .  .  109.1(7)
  Cu4  N1e  C1e  .  .  .  130.3(7)
  Cu4  N1e  C7e  .  .  .  122.6(7)
  C1e  N1e  C7e  .  .  .  107.0(8)
  C6e  N2e  C7e  .  .  .  107.8(9)
  C10e  N3e  C11e  .  .  .  107.7(10)
  C10e  N4e  C16e  .  .  .  109.7(8)
  N1e  C1e  C2e  .  .  .  130.4(8)
  N1e  C1e  C6e  .  .  .  108.6(10)
  C2e  C1e  C6e  .  .  .  121.0(9)
  C1e  C2e  C3e  .  .  .  117.8(9)
  C2e  C3e  C4e  .  .  .  121.0(13)
  C3e  C4e  C5e  .  .  .  121.4(11)
  C4e  C5e  C6e  .  .  .  117.0(10)
  N2e  C6e  C1e  .  .  .  106.2(8)
  N2e  C6e  C5e  .  .  .  131.9(10)
  C1e  C6e  C5e  .  .  .  121.8(12)
  N1e  C7e  N2e  .  .  .  110.3(10)
  N1e  C7e  C8e  .  .  .  124.6(8)
  N2e  C7e  C8e  .  .  .  125.1(10)
  O1e  C8e  C7e  .  .  .  109.2(9)
  O1e  C8e  C9e  .  .  .  108.9(8)
  C7e  C8e  C9e  .  .  .  113.2(11)
  O2e  C9e  C8e  .  .  .  109.3(8)
  O2e  C9e  C10e  .  .  .  108.9(11)
  C8e  C9e  C10e  .  .  .  112.8(10)
  N3e  C10e  N4e  .  .  .  110.3(11)
  N3e  C10e  C9e  .  .  .  126.2(12)
  N4e  C10e  C9e  .  .  .  123.4(8)
  N3e  C11e  C12e  .  .  .  132.3(10)
  N3e  C11e  C16e  .  .  .  108.1(8)
  C12e  C11e  C16e  .  .  .  119.6(13)
  C11e  C12e  C13e  .  .  .  117.2(10)
  C12e  C13e  C14e  .  .  .  121.9(11)
  C13e  C14e  C15e  .  .  .  121.7(15)
  C14e  C15e  C16e  .  .  .  116.2(11)
  N4e  C16e  C11e  .  .  .  104.2(12)
  N4e  C16e  C15e  .  .  .  132.5(9)
  C11e  C16e  C15e  .  .  .  123.3(10)
  O1f  Cl1f  O2f  .  .  .  109.9(7)
  O1f  Cl1f  O3f  .  .  .  109.7(5)
  O1f  Cl1f  O4f  .  .  .  110.8(5)
  O2f  Cl1f  O3f  .  .  .  110.6(6)
  O2f  Cl1f  O4f  .  .  .  106.9(5)
  O3f  Cl1f  O4f  .  .  .  109.0(6)
  O1g  Cl1g  O2g  .  .  .  110.7(6)
  O1g  Cl1g  O3g  .  .  .  109.3(7)
  O1g  Cl1g  O4g  .  .  .  109.3(5)
  O2g  Cl1g  O3g  .  .  .  109.0(5)
  O2g  Cl1g  O4g  .  .  .  108.7(6)
  O3g  Cl1g  O4g  .  .  .  109.8(6)
  O1h  Cl1h  O2h  .  .  .  114.0(10)
  O1h  Cl1h  O3h  .  .  .  111.1(13)
  O1h  Cl1h  O4h  .  .  .  96.4(13)
  O2h  Cl1h  O3h  .  .  .  112.9(10)
  O2h  Cl1h  O4h  .  .  .  113.7(15)
  O3h  Cl1h  O4h  .  .  .  107.5(13)
  O1i  Cl1i  O2i  .  .  .  111.9(15)
  O1i  Cl1i  O3i  .  .  .  111.0(19)
  O1i  Cl1i  O4i  .  .  .  104.3(17)
  O2i  Cl1i  O3i  .  .  .  110.4(15)
  O2i  Cl1i  O4i  .  .  .  109(3)
  O3i  Cl1i  O4i  .  .  .  110(3)
  O1j  Cl1j  O2j  .  .  .  106.7(11)
  O1j  Cl1j  O3j  .  .  .  107.8(9)
  O1j  Cl1j  O4j  .  .  .  119.8(10)
  O2j  Cl1j  O3j  .  .  .  108.1(15)
  O2j  Cl1j  O4j  .  .  .  101.5(11)
  O3j  Cl1j  O4j  .  .  .  112.1(13)
  O1k  Cl1k  O2k  .  .  .  107.1(11)
  O1k  Cl1k  O3k  .  .  .  115.1(14)
  O1k  Cl1k  O4k  .  .  .  102.7(10)
  O2k  Cl1k  O3k  .  .  .  114.4(11)
  O2k  Cl1k  O4k  .  .  .  108.4(13)
  O3k  Cl1k  O4k  .  .  .  108.4(17)
  O1l  Cl1l  O2l  .  .  .  107.4(14)
  O1l  Cl1l  O3l  .  .  .  117.5(11)
  O1l  Cl1l  O4l  .  .  .  112.8(11)
  O2l  Cl1l  O3l  .  .  .  119.6(12)
  O2l  Cl1l  O4l  .  .  .  96.4(11)
  O3l  Cl1l  O4l  .  .  .  100.9(11)
  O1p  C1p  C2p  .  .  .  114.9(18)
  O1q  C1q  C2q  .  .  .  110.7(11)
  O1r  C1r  C2r  .  .  .  120(5)
  C1s  O1s  C2t  .  .  .  84(3)
  O1s  C1s  C2s  .  .  .  100.6(19)
  O1t  C1t  C2t  .  .  .  123(3)
  O1s  C2t  C1t  .  .  .  150(4)
 
 
 
loop_
_geom_torsion_atom_site_label_1
_geom_torsion_atom_site_label_2
_geom_torsion_atom_site_label_3
_geom_torsion_atom_site_label_4
_geom_torsion_site_symmetry_1
_geom_torsion_site_symmetry_2
_geom_torsion_site_symmetry_3
_geom_torsion_site_symmetry_4
_geom_torsion
  O1a  Cu1  Cu2  O1a  .  .  .  .  -.0(5)
  O1a  Cu1  Cu2  N3a  .  .  .  .  15.5(5)
  O1a  Cu1  Cu2  O1b  .  .  .  .  -173.1(6)
  O1a  Cu1  Cu2  N3b  .  .  .  .  177.2(6)
  O1b  Cu1  Cu2  O1a  .  .  .  .  173.1(6)
  O1b  Cu1  Cu2  N3a  .  .  .  .  -171.4(6)
  O1b  Cu1  Cu2  O1b  .  .  .  .  .0(6)
  O1b  Cu1  Cu2  N3b  .  .  .  .  -9.8(6)
  N1b  Cu1  Cu2  O1a  .  .  .  .  -159.5(5)
  N1b  Cu1  Cu2  N3a  .  .  .  .  -144.0(5)
  N1b  Cu1  Cu2  O1b  .  .  .  .  27.4(6)
  N1b  Cu1  Cu2  N3b  .  .  .  .  17.7(5)
  O1d  Cu1  Cu2  O1a  .  .  .  .  95.1(4)
  O1d  Cu1  Cu2  N3a  .  .  .  .  110.7(4)
  O1d  Cu1  Cu2  O1b  .  .  .  .  -77.9(5)
  O1d  Cu1  Cu2  N3b  .  .  .  .  -87.7(4)
  N1d  Cu1  Cu2  O1a  .  .  .  .  12.6(6)
  N1d  Cu1  Cu2  N3a  .  .  .  .  28.2(6)
  N1d  Cu1  Cu2  O1b  .  .  .  .  -160.4(6)
  N1d  Cu1  Cu2  N3b  .  .  .  .  -170.2(6)
  Cu2  Cu1  O1a  Cu2  .  .  .  .  .00(6)
  Cu2  Cu1  O1a  C8a  .  .  .  .  172.1(11)
  O1b  Cu1  O1a  Cu2  .  .  .  .  -4.3(4)
  O1b  Cu1  O1a  C8a  .  .  .  .  167.9(9)
  N1b  Cu1  O1a  Cu2  .  .  .  .  39.7(9)
  N1b  Cu1  O1a  C8a  .  .  .  .  -148.2(9)
  O1d  Cu1  O1a  Cu2  .  .  .  .  -93.9(3)
  O1d  Cu1  O1a  C8a  .  .  .  .  78.2(9)
  N1d  Cu1  O1a  Cu2  .  .  .  .  -171.3(4)
  N1d  Cu1  O1a  C8a  .  .  .  .  .8(9)
  Cu2  Cu1  O1b  Cu2  .  .  .  .  -.00(7)
  Cu2  Cu1  O1b  C8b  .  .  .  .  155.9(10)
  O1a  Cu1  O1b  Cu2  .  .  .  .  4.5(4)
  O1a  Cu1  O1b  C8b  .  .  .  .  160.4(8)
  N1b  Cu1  O1b  Cu2  .  .  .  .  -155.3(5)
  N1b  Cu1  O1b  C8b  .  .  .  .  .6(8)
  O1d  Cu1  O1b  Cu2  .  .  .  .  107.0(4)
  O1d  Cu1  O1b  C8b  .  .  .  .  -97.1(8)
  N1d  Cu1  O1b  Cu2  .  .  .  .  71.4(15)
  N1d  Cu1  O1b  C8b  .  .  .  .  -132.7(14)
  Cu2  Cu1  N1b  C1b  .  .  .  .  157.8(12)
  Cu2  Cu1  N1b  C7b  .  .  .  .  -14.1(10)
  O1a  Cu1  N1b  C1b  .  .  .  .  131.2(12)
  O1a  Cu1  N1b  C7b  .  .  .  .  -40.6(13)
  O1b  Cu1  N1b  C1b  .  .  .  .  174.0(14)
  O1b  Cu1  N1b  C7b  .  .  .  .  2.1(9)
  O1d  Cu1  N1b  C1b  .  .  .  .  -94.3(13)
  O1d  Cu1  N1b  C7b  .  .  .  .  93.9(9)
  N1d  Cu1  N1b  C1b  .  .  .  .  -16.6(14)
  N1d  Cu1  N1b  C7b  .  .  .  .  171.5(9)
  Cu2  Cu1  O1d  C8d  .  .  .  .  -121.1(8)
  O1a  Cu1  O1d  C8d  .  .  .  .  -81.1(8)
  O1b  Cu1  O1d  C8d  .  .  .  .  -157.2(8)
  N1b  Cu1  O1d  C8d  .  .  .  .  120.0(8)
  N1d  Cu1  O1d  C8d  .  .  .  .  14.5(8)
  Cu2  Cu1  N1d  C1d  .  .  .  .  -90.8(11)
  Cu2  Cu1  N1d  C7d  .  .  .  .  85.7(9)
  O1a  Cu1  N1d  C1d  .  .  .  .  -82.8(11)
  O1a  Cu1  N1d  C7d  .  .  .  .  93.7(9)
  O1b  Cu1  N1d  C1d  .  .  .  .  -147.1(13)
  O1b  Cu1  N1d  C7d  .  .  .  .  29.4(19)
  N1b  Cu1  N1d  C1d  .  .  .  .  81.8(11)
  N1b  Cu1  N1d  C7d  .  .  .  .  -101.7(9)
  O1d  Cu1  N1d  C1d  .  .  .  .  176.0(11)
  O1d  Cu1  N1d  C7d  .  .  .  .  -7.4(8)
  Cu1  Cu2  O1a  Cu1  .  .  .  .  -.00(6)
  Cu1  Cu2  O1a  C8a  .  .  .  .  -172.3(10)
  N3a  Cu2  O1a  Cu1  .  .  .  .  -168.2(4)
  N3a  Cu2  O1a  C8a  .  .  .  .  19.5(9)
  O1b  Cu2  O1a  Cu1  .  .  .  .  4.3(4)
  O1b  Cu2  O1a  C8a  .  .  .  .  -168.0(9)
  N3b  Cu2  O1a  Cu1  .  .  .  .  -8.9(16)
  N3b  Cu2  O1a  C8a  .  .  .  .  178.8(14)
  Cu1  Cu2  N3a  C10a  .  .  .  .  -36.3(10)
  Cu1  Cu2  N3a  C11a  .  .  .  .  130.4(9)
  O1a  Cu2  N3a  C10a  .  .  .  .  -26.6(9)
  O1a  Cu2  N3a  C11a  .  .  .  .  140.0(10)
  O1b  Cu2  N3a  C10a  .  .  .  .  -57.5(18)
  O1b  Cu2  N3a  C11a  .  .  .  .  109.2(13)
  N3b  Cu2  N3a  C10a  .  .  .  .  158.7(9)
  N3b  Cu2  N3a  C11a  .  .  .  .  -34.6(11)
  Cu1  Cu2  O1b  Cu1  .  .  .  .  .00(7)
  Cu1  Cu2  O1b  C8b  .  .  .  .  -152.7(11)
  O1a  Cu2  O1b  Cu1  .  .  .  .  -4.5(4)
  O1a  Cu2  O1b  C8b  .  .  .  .  -157.2(10)
  N3a  Cu2  O1b  Cu1  .  .  .  .  27.4(15)
  N3a  Cu2  O1b  C8b  .  .  .  .  -125.2(13)
  N3b  Cu2  O1b  Cu1  .  .  .  .  172.2(5)
  N3b  Cu2  O1b  C8b  .  .  .  .  19.5(10)
  Cu1  Cu2  N3b  C10b  .  .  .  .  -26.0(11)
  Cu1  Cu2  N3b  C11b  .  .  .  .  149.8(9)
  O1a  Cu2  N3b  C10b  .  .  .  .  -19(2)
  O1a  Cu2  N3b  C11b  .  .  .  .  156.7(12)
  N3a  Cu2  N3b  C10b  .  .  .  .  139.8(9)
  N3a  Cu2  N3b  C11b  .  .  .  .  -44.5(11)
  O1b  Cu2  N3b  C10b  .  .  .  .  -31.8(10)
  O1b  Cu2  N3b  C11b  .  .  .  .  144.0(11)
  O2a  Cu3  Cu4  O2a  .  .  .  .  .0(5)
  O2a  Cu3  Cu4  O1c  .  .  .  .  169.5(5)
  O2a  Cu3  Cu4  N1c  .  .  .  .  -165.2(5)
  O2a  Cu3  Cu4  O1e  .  .  .  .  79.5(4)
  O2a  Cu3  Cu4  N1e  .  .  .  .  -3.6(6)
  N1a  Cu3  Cu4  O2a  .  .  .  .  20.3(5)
  N1a  Cu3  Cu4  O1c  .  .  .  .  -170.2(5)
  N1a  Cu3  Cu4  N1c  .  .  .  .  -144.9(5)
  N1a  Cu3  Cu4  O1e  .  .  .  .  99.8(4)
  N1a  Cu3  Cu4  N1e  .  .  .  .  16.8(6)
  O1c  Cu3  Cu4  O2a  .  .  .  .  -169.5(5)
  O1c  Cu3  Cu4  O1c  .  .  .  .  -.0(5)
  O1c  Cu3  Cu4  N1c  .  .  .  .  25.3(5)
  O1c  Cu3  Cu4  O1e  .  .  .  .  -90.0(4)
  O1c  Cu3  Cu4  N1e  .  .  .  .  -173.0(6)
  N3c  Cu3  Cu4  O2a  .  .  .  .  -179.9(5)
  N3c  Cu3  Cu4  O1c  .  .  .  .  -10.5(5)
  N3c  Cu3  Cu4  N1c  .  .  .  .  14.8(5)
  N3c  Cu3  Cu4  O1e  .  .  .  .  -100.4(4)
  N3c  Cu3  Cu4  N1e  .  .  .  .  176.5(6)
  Cu4  Cu3  O2a  Cu4  .  .  .  .  -.00(6)
  Cu4  Cu3  O2a  C9a  .  .  .  .  -176.9(10)
  N1a  Cu3  O2a  Cu4  .  .  .  .  -164.0(4)
  N1a  Cu3  O2a  C9a  .  .  .  .  19.1(8)
  O1c  Cu3  O2a  Cu4  .  .  .  .  6.5(3)
  O1c  Cu3  O2a  C9a  .  .  .  .  -170.4(8)
  N3c  Cu3  O2a  Cu4  .  .  .  .  .2(15)
  N3c  Cu3  O2a  C9a  .  .  .  .  -176.7(13)
  Cu4  Cu3  N1a  C1a  .  .  .  .  129.2(8)
  Cu4  Cu3  N1a  C7a  .  .  .  .  -43.9(10)
  O2a  Cu3  N1a  C1a  .  .  .  .  141.7(10)
  O2a  Cu3  N1a  C7a  .  .  .  .  -31.5(9)
  O1c  Cu3  N1a  C1a  .  .  .  .  109.3(11)
  O1c  Cu3  N1a  C7a  .  .  .  .  -63.9(15)
  N3c  Cu3  N1a  C1a  .  .  .  .  -34.3(10)
  N3c  Cu3  N1a  C7a  .  .  .  .  152.5(8)
  Cu4  Cu3  O1c  Cu4  .  .  .  .  .00(6)
  Cu4  Cu3  O1c  C8c  .  .  .  .  -158.0(10)
  O2a  Cu3  O1c  Cu4  .  .  .  .  -6.8(4)
  O2a  Cu3  O1c  C8c  .  .  .  .  -164.7(9)
  N1a  Cu3  O1c  Cu4  .  .  .  .  27.0(12)
  N1a  Cu3  O1c  C8c  .  .  .  .  -130.9(11)
  N3c  Cu3  O1c  Cu4  .  .  .  .  171.7(4)
  N3c  Cu3  O1c  C8c  .  .  .  .  13.7(8)
  Cu4  Cu3  N3c  C10c  .  .  .  .  -20.2(10)
  Cu4  Cu3  N3c  C11c  .  .  .  .  163.1(8)
  O2a  Cu3  N3c  C10c  .  .  .  .  -20.3(19)
  O2a  Cu3  N3c  C11c  .  .  .  .  162.9(12)
  N1a  Cu3  N3c  C10c  .  .  .  .  143.4(9)
  N1a  Cu3  N3c  C11c  .  .  .  .  -33.3(11)
  O1c  Cu3  N3c  C10c  .  .  .  .  -26.4(9)
  O1c  Cu3  N3c  C11c  .  .  .  .  156.8(10)
  Cu3  Cu4  O2a  Cu3  .  .  .  .  .00(6)
  Cu3  Cu4  O2a  C9a  .  .  .  .  176.8(10)
  O1c  Cu4  O2a  Cu3  .  .  .  .  -6.5(3)
  O1c  Cu4  O2a  C9a  .  .  .  .  170.3(9)
  N1c  Cu4  O2a  Cu3  .  .  .  .  29.7(8)
  N1c  Cu4  O2a  C9a  .  .  .  .  -153.5(8)
  O1e  Cu4  O2a  Cu3  .  .  .  .  -107.5(3)
  O1e  Cu4  O2a  C9a  .  .  .  .  69.2(8)
  N1e  Cu4  O2a  Cu3  .  .  .  .  177.6(4)
  N1e  Cu4  O2a  C9a  .  .  .  .  -5.7(9)
  Cu3  Cu4  O1c  Cu3  .  .  .  .  -.00(6)
  Cu3  Cu4  O1c  C8c  .  .  .  .  160.7(9)
  O2a  Cu4  O1c  Cu3  .  .  .  .  6.8(4)
  O2a  Cu4  O1c  C8c  .  .  .  .  167.5(8)
  N1c  Cu4  O1c  Cu3  .  .  .  .  -157.2(4)
  N1c  Cu4  O1c  C8c  .  .  .  .  3.5(7)
  O1e  Cu4  O1c  Cu3  .  .  .  .  99.2(4)
  O1e  Cu4  O1c  C8c  .  .  .  .  -100.1(7)
  Cu3  Cu4  N1c  C1c  .  .  .  .  156.8(11)
  Cu3  Cu4  N1c  C7c  .  .  .  .  -13.5(9)
  O2a  Cu4  N1c  C1c  .  .  .  .  136.6(11)
  O2a  Cu4  N1c  C7c  .  .  .  .  -33.7(12)
  O1c  Cu4  N1c  C1c  .  .  .  .  171.8(13)
  O1c  Cu4  N1c  C7c  .  .  .  .  1.4(8)
  O1e  Cu4  N1c  C1c  .  .  .  .  -87.7(12)
  O1e  Cu4  N1c  C7c  .  .  .  .  101.9(8)
  N1e  Cu4  N1c  C1c  .  .  .  .  -10.4(13)
  N1e  Cu4  N1c  C7c  .  .  .  .  179.3(8)
  Cu3  Cu4  O1e  C8e  .  .  .  .  -131.0(7)
  O2a  Cu4  O1e  C8e  .  .  .  .  -92.8(7)
  O1c  Cu4  O1e  C8e  .  .  .  .  -168.7(7)
  N1c  Cu4  O1e  C8e  .  .  .  .  106.1(8)
  N1e  Cu4  O1e  C8e  .  .  .  .  4.5(8)
  Cu3  Cu4  N1e  C1e  .  .  .  .  -83.4(11)
  Cu3  Cu4  N1e  C7e  .  .  .  .  92.3(10)
  O2a  Cu4  N1e  C1e  .  .  .  .  -85.7(11)
  O2a  Cu4  N1e  C7e  .  .  .  .  90.0(10)
  N1c  Cu4  N1e  C1e  .  .  .  .  79.6(11)
  N1c  Cu4  N1e  C7e  .  .  .  .  -104.7(10)
  O1e  Cu4  N1e  C1e  .  .  .  .  -178.9(11)
  O1e  Cu4  N1e  C7e  .  .  .  .  -3.1(9)
  Cu1  O1a  C8a  C7a  .  .  .  .  89.4(10)
  Cu1  O1a  C8a  C9a  .  .  .  .  -149.5(7)
  Cu2  O1a  C8a  C7a  .  .  .  .  -100.3(10)
  Cu2  O1a  C8a  C9a  .  .  .  .  20.8(12)
  Cu3  O2a  C9a  C8a  .  .  .  .  23.3(12)
  Cu3  O2a  C9a  C10a  .  .  .  .  -99.3(10)
  Cu4  O2a  C9a  C8a  .  .  .  .  -152.7(7)
  Cu4  O2a  C9a  C10a  .  .  .  .  84.7(11)
  Cu3  N1a  C1a  C2a  .  .  .  .  4.1(18)
  Cu3  N1a  C1a  C6a  .  .  .  .  -176.5(8)
  C7a  N1a  C1a  C2a  .  .  .  .  178.2(12)
  C7a  N1a  C1a  C6a  .  .  .  .  -2.5(12)
  Cu3  N1a  C7a  N2a  .  .  .  .  175.8(7)
  Cu3  N1a  C7a  C8a  .  .  .  .  -.6(14)
  C1a  N1a  C7a  N2a  .  .  .  .  1.0(12)
  C1a  N1a  C7a  C8a  .  .  .  .  -175.5(10)
  C7a  N2a  C6a  C1a  .  .  .  .  -2.4(12)
  C7a  N2a  C6a  C5a  .  .  .  .  180.0(13)
  C6a  N2a  C7a  N1a  .  .  .  .  .9(13)
  C6a  N2a  C7a  C8a  .  .  .  .  177.3(10)
  Cu2  N3a  C10a  N4a  .  .  .  .  171.5(8)
  Cu2  N3a  C10a  C9a  .  .  .  .  -7.8(15)
  C11a  N3a  C10a  N4a  .  .  .  .  1.5(13)
  C11a  N3a  C10a  C9a  .  .  .  .  -177.9(11)
  Cu2  N3a  C11a  C12a  .  .  .  .  13(2)
  Cu2  N3a  C11a  C16a  .  .  .  .  -170.7(8)
  C10a  N3a  C11a  C12a  .  .  .  .  -178.9(13)
  C10a  N3a  C11a  C16a  .  .  .  .  -2.6(13)
  C16a  N4a  C10a  N3a  .  .  .  .  .3(13)
  C16a  N4a  C10a  C9a  .  .  .  .  179.6(11)
  C10a  N4a  C16a  C11a  .  .  .  .  -1.9(13)
  C10a  N4a  C16a  C15a  .  .  .  .  179.3(13)
  N1a  C1a  C2a  C3a  .  .  .  .  179.6(11)
  C6a  C1a  C2a  C3a  .  .  .  .  .3(17)
  N1a  C1a  C6a  N2a  .  .  .  .  3.0(12)
  N1a  C1a  C6a  C5a  .  .  .  .  -179.1(11)
  C2a  C1a  C6a  N2a  .  .  .  .  -177.6(10)
  C2a  C1a  C6a  C5a  .  .  .  .  .4(18)
  C1a  C2a  C3a  C4a  .  .  .  .  -2.0(18)
  C2a  C3a  C4a  C5a  .  .  .  .  3(2)
  C3a  C4a  C5a  C6a  .  .  .  .  -2.4(19)
  C4a  C5a  C6a  N2a  .  .  .  .  178.0(13)
  C4a  C5a  C6a  C1a  .  .  .  .  .7(18)
  N1a  C7a  C8a  O1a  .  .  .  .  176.0(9)
  N1a  C7a  C8a  C9a  .  .  .  .  54.5(12)
  N2a  C7a  C8a  O1a  .  .  .  .  -.0(12)
  N2a  C7a  C8a  C9a  .  .  .  .  -121.5(11)
  O1a  C8a  C9a  O2a  .  .  .  .  174.8(8)
  O1a  C8a  C9a  C10a  .  .  .  .  -62.0(10)
  C7a  C8a  C9a  O2a  .  .  .  .  -62.7(10)
  C7a  C8a  C9a  C10a  .  .  .  .  60.5(8)
  O2a  C9a  C10a  N3a  .  .  .  .  -177.4(10)
  O2a  C9a  C10a  N4a  .  .  .  .  3.4(16)
  C8a  C9a  C10a  N3a  .  .  .  .  59.6(13)
  C8a  C9a  C10a  N4a  .  .  .  .  -119.6(11)
  N3a  C11a  C12a  C13a  .  .  .  .  177.8(12)
  C16a  C11a  C12a  C13a  .  .  .  .  1.9(18)
  N3a  C11a  C16a  N4a  .  .  .  .  2.8(13)
  N3a  C11a  C16a  C15a  .  .  .  .  -178.3(11)
  C12a  C11a  C16a  N4a  .  .  .  .  179.5(11)
  C12a  C11a  C16a  C15a  .  .  .  .  -1.5(19)
  C11a  C12a  C13a  C14a  .  .  .  .  -1.1(19)
  C12a  C13a  C14a  C15a  .  .  .  .  0(2)
  C13a  C14a  C15a  C16a  .  .  .  .  .4(19)
  C14a  C15a  C16a  N4a  .  .  .  .  179.0(13)
  C14a  C15a  C16a  C11a  .  .  .  .  .4(19)
  Cu1  O1b  C8b  C7b  .  .  .  .  -2.7(12)
  Cu1  O1b  C8b  C9b  .  .  .  .  -126.6(9)
  Cu2  O1b  C8b  C7b  .  .  .  .  147.0(8)
  Cu2  O1b  C8b  C9b  .  .  .  .  23.1(14)
  Cu1  N1b  C1b  C2b  .  .  .  .  5(3)
  Cu1  N1b  C1b  C6b  .  .  .  .  -172.6(10)
  C7b  N1b  C1b  C2b  .  .  .  .  177.0(14)
  C7b  N1b  C1b  C6b  .  .  .  .  -.5(14)
  Cu1  N1b  C7b  N2b  .  .  .  .  175.4(8)
  Cu1  N1b  C7b  C8b  .  .  .  .  -4.6(14)
  C1b  N1b  C7b  N2b  .  .  .  .  .8(14)
  C1b  N1b  C7b  C8b  .  .  .  .  -179.3(11)
  C7b  N2b  C6b  C1b  .  .  .  .  .4(15)
  C7b  N2b  C6b  C5b  .  .  .  .  -179.4(17)
  C6b  N2b  C7b  N1b  .  .  .  .  -.8(15)
  C6b  N2b  C7b  C8b  .  .  .  .  179.3(12)
  Cu2  N3b  C10b  N4b  .  .  .  .  178.3(8)
  Cu2  N3b  C10b  C9b  .  .  .  .  .0(16)
  C11b  N3b  C10b  N4b  .  .  .  .  1.6(14)
  C11b  N3b  C10b  C9b  .  .  .  .  -176.7(11)
  Cu2  N3b  C11b  C12b  .  .  .  .  4(2)
  Cu2  N3b  C11b  C16b  .  .  .  .  -177.3(9)
  C10b  N3b  C11b  C12b  .  .  .  .  -179.9(14)
  C10b  N3b  C11b  C16b  .  .  .  .  -1.1(14)
  C16b  N4b  C10b  N3b  .  .  .  .  -1.5(14)
  C16b  N4b  C10b  C9b  .  .  .  .  176.8(12)
  C10b  N4b  C16b  C11b  .  .  .  .  .7(14)
  C10b  N4b  C16b  C15b  .  .  .  .  178.7(14)
  N1b  C1b  C2b  C3b  .  .  .  .  -178.4(14)
  C6b  C1b  C2b  C3b  .  .  .  .  -1(2)
  N1b  C1b  C6b  N2b  .  .  .  .  .0(15)
  N1b  C1b  C6b  C5b  .  .  .  .  179.9(14)
  C2b  C1b  C6b  N2b  .  .  .  .  -177.7(13)
  C2b  C1b  C6b  C5b  .  .  .  .  2(3)
  C1b  C2b  C3b  C4b  .  .  .  .  0(3)
  C2b  C3b  C4b  C5b  .  .  .  .  2(3)
  C3b  C4b  C5b  C6b  .  .  .  .  0(3)
  C4b  C5b  C6b  N2b  .  .  .  .  178.6(16)
  C4b  C5b  C6b  C1b  .  .  .  .  -1(3)
  N1b  C7b  C8b  O1b  .  .  .  .  4.8(15)
  N1b  C7b  C8b  C9b  .  .  .  .  126.1(11)
  N2b  C7b  C8b  O1b  .  .  .  .  -175.3(12)
  N2b  C7b  C8b  C9b  .  .  .  .  -53.9(15)
  O1b  C8b  C9b  O2b  .  .  .  .  58.4(13)
  O1b  C8b  C9b  C10b  .  .  .  .  -61.9(11)
  C7b  C8b  C9b  O2b  .  .  .  .  -60.0(11)
  C7b  C8b  C9b  C10b  .  .  .  .  179.7(7)
  O2b  C9b  C10b  N3b  .  .  .  .  -64.9(15)
  O2b  C9b  C10b  N4b  .  .  .  .  117.1(12)
  C8b  C9b  C10b  N3b  .  .  .  .  53.6(14)
  C8b  C9b  C10b  N4b  .  .  .  .  -124.4(11)
  N3b  C11b  C12b  C13b  .  .  .  .  179.0(13)
  C16b  C11b  C12b  C13b  .  .  .  .  .3(18)
  N3b  C11b  C16b  N4b  .  .  .  .  .2(14)
  N3b  C11b  C16b  C15b  .  .  .  .  -178.0(12)
  C12b  C11b  C16b  N4b  .  .  .  .  179.2(11)
  C12b  C11b  C16b  C15b  .  .  .  .  0(2)
  C11b  C12b  C13b  C14b  .  .  .  .  -1(3)
  C12b  C13b  C14b  C15b  .  .  .  .  1(3)
  C13b  C14b  C15b  C16b  .  .  .  .  0(3)
  C14b  C15b  C16b  N4b  .  .  .  .  -178.9(14)
  C14b  C15b  C16b  C11b  .  .  .  .  -1(2)
  Cu3  O1c  C8c  C7c  .  .  .  .  148.9(7)
  Cu3  O1c  C8c  C9c  .  .  .  .  25.4(12)
  Cu4  O1c  C8c  C7c  .  .  .  .  -6.7(11)
  Cu4  O1c  C8c  C9c  .  .  .  .  -130.2(8)
  Cu4  N1c  C1c  C2c  .  .  .  .  9(3)
  Cu4  N1c  C1c  C6c  .  .  .  .  -170.7(10)
  C7c  N1c  C1c  C2c  .  .  .  .  179.3(13)
  C7c  N1c  C1c  C6c  .  .  .  .  .1(13)
  Cu4  N1c  C7c  N2c  .  .  .  .  174.3(8)
  Cu4  N1c  C7c  C8c  .  .  .  .  -6.0(13)
  C1c  N1c  C7c  N2c  .  .  .  .  .7(13)
  C1c  N1c  C7c  C8c  .  .  .  .  -179.6(10)
  C7c  N2c  C6c  C1c  .  .  .  .  1.1(13)
  C7c  N2c  C6c  C5c  .  .  .  .  -177.4(13)
  C6c  N2c  C7c  N1c  .  .  .  .  -1.2(13)
  C6c  N2c  C7c  C8c  .  .  .  .  179.2(11)
  Cu3  N3c  C10c  N4c  .  .  .  .  -176.3(7)
  Cu3  N3c  C10c  C9c  .  .  .  .  -.8(15)
  C11c  N3c  C10c  N4c  .  .  .  .  1.1(12)
  C11c  N3c  C10c  C9c  .  .  .  .  176.6(11)
  Cu3  N3c  C11c  C12c  .  .  .  .  -3.7(18)
  Cu3  N3c  C11c  C16c  .  .  .  .  175.6(8)
  C10c  N3c  C11c  C12c  .  .  .  .  179.3(12)
  C10c  N3c  C11c  C16c  .  .  .  .  -1.5(12)
  C16c  N4c  C10c  N3c  .  .  .  .  -.3(13)
  C16c  N4c  C10c  C9c  .  .  .  .  -175.9(11)
  C10c  N4c  C16c  C11c  .  .  .  .  -.6(12)
  C10c  N4c  C16c  C15c  .  .  .  .  177.8(12)
  N1c  C1c  C2c  C3c  .  .  .  .  -178.7(13)
  C6c  C1c  C2c  C3c  .  .  .  .  .4(18)
  N1c  C1c  C6c  N2c  .  .  .  .  -.8(13)
  N1c  C1c  C6c  C5c  .  .  .  .  177.9(12)
  C2c  C1c  C6c  N2c  .  .  .  .  179.9(11)
  C2c  C1c  C6c  C5c  .  .  .  .  -1.5(19)
  C1c  C2c  C3c  C4c  .  .  .  .  0(2)
  C2c  C3c  C4c  C5c  .  .  .  .  0(3)
  C3c  C4c  C5c  C6c  .  .  .  .  0(2)
  C4c  C5c  C6c  N2c  .  .  .  .  179.6(13)
  C4c  C5c  C6c  C1c  .  .  .  .  1(2)
  N1c  C7c  C8c  O1c  .  .  .  .  8.0(14)
  N1c  C7c  C8c  C9c  .  .  .  .  129.8(10)
  N2c  C7c  C8c  O1c  .  .  .  .  -172.3(11)
  N2c  C7c  C8c  C9c  .  .  .  .  -50.5(15)
  O1c  C8c  C9c  O2c  .  .  .  .  62.1(12)
  O1c  C8c  C9c  C10c  .  .  .  .  -58.4(10)
  C7c  C8c  C9c  O2c  .  .  .  .  -55.9(11)
  C7c  C8c  C9c  C10c  .  .  .  .  -176.4(7)
  O2c  C9c  C10c  N3c  .  .  .  .  -71.9(13)
  O2c  C9c  C10c  N4c  .  .  .  .  103.0(11)
  C8c  C9c  C10c  N3c  .  .  .  .  49.3(14)
  C8c  C9c  C10c  N4c  .  .  .  .  -135.8(10)
  N3c  C11c  C12c  C13c  .  .  .  .  178.0(12)
  C16c  C11c  C12c  C13c  .  .  .  .  -1.1(17)
  N3c  C11c  C16c  N4c  .  .  .  .  1.3(12)
  N3c  C11c  C16c  C15c  .  .  .  .  -177.3(10)
  C12c  C11c  C16c  N4c  .  .  .  .  -179.4(10)
  C12c  C11c  C16c  C15c  .  .  .  .  2.0(17)
  C11c  C12c  C13c  C14c  .  .  .  .  -.0(18)
  C12c  C13c  C14c  C15c  .  .  .  .  .4(19)
  C13c  C14c  C15c  C16c  .  .  .  .  .4(18)
  C14c  C15c  C16c  N4c  .  .  .  .  -179.8(12)
  C14c  C15c  C16c  C11c  .  .  .  .  -1.6(17)
  Cu1  O1d  C8d  C7d  .  .  .  .  -17.1(11)
  Cu1  O1d  C8d  C9d  .  .  .  .  -139.2(9)
  Cu1  N1d  C1d  C2d  .  .  .  .  -2(2)
  Cu1  N1d  C1d  C6d  .  .  .  .  175.8(9)
  C7d  N1d  C1d  C2d  .  .  .  .  -178.5(13)
  C7d  N1d  C1d  C6d  .  .  .  .  -1.1(13)
  Cu1  N1d  C7d  N2d  .  .  .  .  -177.4(8)
  Cu1  N1d  C7d  C8d  .  .  .  .  -.5(15)
  C1d  N1d  C7d  N2d  .  .  .  .  -.0(13)
  C1d  N1d  C7d  C8d  .  .  .  .  176.9(11)
  C7d  N2d  C6d  C1d  .  .  .  .  -1.8(13)
  C7d  N2d  C6d  C5d  .  .  .  .  178.2(14)
  C6d  N2d  C7d  N1d  .  .  .  .  1.1(14)
  C6d  N2d  C7d  C8d  .  .  .  .  -175.8(11)
  C11d  N3d  C10d  N4d  .  .  .  .  .5(14)
  C11d  N3d  C10d  C9d  .  .  .  .  179.6(12)
  C10d  N3d  C11d  C12d  .  .  .  .  179.6(14)
  C10d  N3d  C11d  C16d  .  .  .  .  -.2(14)
  C16d  N4d  C10d  N3d  .  .  .  .  -.7(14)
  C16d  N4d  C10d  C9d  .  .  .  .  -179.8(12)
  C10d  N4d  C16d  C11d  .  .  .  .  .6(14)
  C10d  N4d  C16d  C15d  .  .  .  .  -179.5(15)
  N1d  C1d  C2d  C3d  .  .  .  .  179.1(12)
  C6d  C1d  C2d  C3d  .  .  .  .  2.0(18)
  N1d  C1d  C6d  N2d  .  .  .  .  1.7(13)
  N1d  C1d  C6d  C5d  .  .  .  .  -178.2(12)
  C2d  C1d  C6d  N2d  .  .  .  .  179.4(12)
  C2d  C1d  C6d  C5d  .  .  .  .  0(2)
  C1d  C2d  C3d  C4d  .  .  .  .  -1.2(19)
  C2d  C3d  C4d  C5d  .  .  .  .  -1(3)
  C3d  C4d  C5d  C6d  .  .  .  .  3(3)
  C4d  C5d  C6d  N2d  .  .  .  .  178.3(14)
  C4d  C5d  C6d  C1d  .  .  .  .  -2(2)
  N1d  C7d  C8d  O1d  .  .  .  .  13.4(15)
  N1d  C7d  C8d  C9d  .  .  .  .  133.5(11)
  N2d  C7d  C8d  O1d  .  .  .  .  -170.1(11)
  N2d  C7d  C8d  C9d  .  .  .  .  -49.9(14)
  O1d  C8d  C9d  O2d  .  .  .  .  -175.2(10)
  O1d  C8d  C9d  C10d  .  .  .  .  65.5(12)
  C7d  C8d  C9d  O2d  .  .  .  .  66.2(13)
  C7d  C8d  C9d  C10d  .  .  .  .  -53.1(10)
  O2d  C9d  C10d  N3d  .  .  .  .  176.5(12)
  O2d  C9d  C10d  N4d  .  .  .  .  -4.5(16)
  C8d  C9d  C10d  N3d  .  .  .  .  -62.2(14)
  C8d  C9d  C10d  N4d  .  .  .  .  116.8(12)
  N3d  C11d  C12d  C13d  .  .  .  .  -179.1(14)
  C16d  C11d  C12d  C13d  .  .  .  .  0(2)
  N3d  C11d  C16d  N4d  .  .  .  .  -.2(14)
  N3d  C11d  C16d  C15d  .  .  .  .  179.8(12)
  C12d  C11d  C16d  N4d  .  .  .  .  179.9(12)
  C12d  C11d  C16d  C15d  .  .  .  .  .0(16)
  C11d  C12d  C13d  C14d  .  .  .  .  -1(3)
  C12d  C13d  C14d  C15d  .  .  .  .  1(3)
  C13d  C14d  C15d  C16d  .  .  .  .  0(3)
  C14d  C15d  C16d  N4d  .  .  .  .  -180.0(15)
  C14d  C15d  C16d  C11d  .  .  .  .  0(3)
  Cu4  O1e  C8e  C7e  .  .  .  .  -4.8(12)
  Cu4  O1e  C8e  C9e  .  .  .  .  -128.8(9)
  Cu4  N1e  C1e  C2e  .  .  .  .  -3(2)
  Cu4  N1e  C1e  C6e  .  .  .  .  175.0(9)
  C7e  N1e  C1e  C2e  .  .  .  .  -179.4(13)
  C7e  N1e  C1e  C6e  .  .  .  .  -1.2(14)
  Cu4  N1e  C7e  N2e  .  .  .  .  -176.5(8)
  Cu4  N1e  C7e  C8e  .  .  .  .  1.4(17)
  C1e  N1e  C7e  N2e  .  .  .  .  .1(14)
  C1e  N1e  C7e  C8e  .  .  .  .  178.0(12)
  C7e  N2e  C6e  C1e  .  .  .  .  -1.7(14)
  C7e  N2e  C6e  C5e  .  .  .  .  177.9(15)
  C6e  N2e  C7e  N1e  .  .  .  .  1.0(14)
  C6e  N2e  C7e  C8e  .  .  .  .  -176.9(12)
  C11e  N3e  C10e  N4e  .  .  .  .  .5(14)
  C11e  N3e  C10e  C9e  .  .  .  .  -176.2(12)
  C10e  N3e  C11e  C12e  .  .  .  .  178.3(14)
  C10e  N3e  C11e  C16e  .  .  .  .  -.7(14)
  C16e  N4e  C10e  N3e  .  .  .  .  -.1(14)
  C16e  N4e  C10e  C9e  .  .  .  .  176.7(11)
  C10e  N4e  C16e  C11e  .  .  .  .  -.3(14)
  C10e  N4e  C16e  C15e  .  .  .  .  -179.8(14)
  N1e  C1e  C2e  C3e  .  .  .  .  176.0(13)
  C6e  C1e  C2e  C3e  .  .  .  .  -2(2)
  N1e  C1e  C6e  N2e  .  .  .  .  1.8(14)
  N1e  C1e  C6e  C5e  .  .  .  .  -177.9(13)
  C2e  C1e  C6e  N2e  .  .  .  .  -179.8(12)
  C2e  C1e  C6e  C5e  .  .  .  .  0(2)
  C1e  C2e  C3e  C4e  .  .  .  .  1(3)
  C2e  C3e  C4e  C5e  .  .  .  .  0(3)
  C3e  C4e  C5e  C6e  .  .  .  .  -2(3)
  C4e  C5e  C6e  N2e  .  .  .  .  -178.0(14)
  C4e  C5e  C6e  C1e  .  .  .  .  2(3)
  N1e  C7e  C8e  O1e  .  .  .  .  3.1(17)
  N1e  C7e  C8e  C9e  .  .  .  .  124.5(12)
  N2e  C7e  C8e  O1e  .  .  .  .  -179.3(11)
  N2e  C7e  C8e  C9e  .  .  .  .  -57.8(15)
  O1e  C8e  C9e  O2e  .  .  .  .  -177.9(10)
  O1e  C8e  C9e  C10e  .  .  .  .  60.8(12)
  C7e  C8e  C9e  O2e  .  .  .  .  60.5(12)
  C7e  C8e  C9e  C10e  .  .  .  .  -60.8(10)
  O2e  C9e  C10e  N3e  .  .  .  .  175.2(11)
  O2e  C9e  C10e  N4e  .  .  .  .  -1.1(16)
  C8e  C9e  C10e  N3e  .  .  .  .  -63.3(15)
  C8e  C9e  C10e  N4e  .  .  .  .  120.4(12)
  N3e  C11e  C12e  C13e  .  .  .  .  179.8(13)
  C16e  C11e  C12e  C13e  .  .  .  .  -1.4(19)
  N3e  C11e  C16e  N4e  .  .  .  .  .6(14)
  N3e  C11e  C16e  C15e  .  .  .  .  -179.9(12)
  C12e  C11e  C16e  N4e  .  .  .  .  -178.5(11)
  C12e  C11e  C16e  C15e  .  .  .  .  1(2)
  C11e  C12e  C13e  C14e  .  .  .  .  1(3)
  C12e  C13e  C14e  C15e  .  .  .  .  0(3)
  C13e  C14e  C15e  C16e  .  .  .  .  0(3)
  C14e  C15e  C16e  N4e  .  .  .  .  178.9(14)
  C14e  C15e  C16e  C11e  .  .  .  .  0(3)

#==END====================================================
 
 
